# Supplementary material for: Catalyst-dependent intrinsic ring-walking behavior on π-face of conjugated polymers
Source: Royal Society of Chemistry journal article supplement (doi:10.1039/c6py01934j), 2017-01-01
Supplement: c6py01934j1.pdf [file c6py01934j1.pdf]

Electronic Supplementary Information for

**Catalyst-Dependent Intrinsic Ring Walking Behavior on  $\pi$ -Face of Conjugated Polymers**

Koichiro Mikami,\* Masataka Nojima, Yui Masumoto, Yoshihide Mizukoshi, Ryo Takita

Tsutomu Yokozawa\* and Masanobu Uchiyama\*

\*To whom correspondence should be addressed. E-mail: K.M. (koichiro.mikami@sagami.or.jp),

T.Y. (yokozt01@kanagawa-u.ac.jp) and M.U. (uchiyama@mol.f.u-tokyo.ac.jp)

**Table of Contents**

|                                                                                |     |
|--------------------------------------------------------------------------------|-----|
| <b>1. Materials</b> .....                                                      | S2  |
| <b>2. General</b> .....                                                        | S2  |
| <b>3. Computational Details</b> .....                                          | S3  |
| <b>4. Synthesis</b> .....                                                      | S4  |
| <b>5. Supporting Figures (Figures S1-S12) and Tables (Tables S1-S23)</b> ..... | S10 |
| <b>6. Supporting References</b> .....                                          | S33 |
| <b>7. Appendix</b> .....                                                       | S35 |

## 1. Materials.

2-Bromo-3-hexyl-5-iodothiophene (1) and [1,3-bis(2,6-diisopropylphenyl)imidazol-2-ylidene]triphenylphosphine nickel(II) dichloride ( $\text{NiCl}_2(\text{PPh}_3)\text{IPr}$ ) were purchased from Tokyo Chemical Industry Co., Ltd.  $\text{NiCl}_2(\text{dppp})$ , PEPPSI-IPr, 2,5-dibromothiophene and isopropylmagnesium chloride (2.0 M solution in THF) were purchased from Sigma-Aldrich Co. Commercially available dehydrated tetrahydrofuran (THF, stabilizer-free, Kanto Chemical Co., Inc.) was used as a dry solvent. 2-Thienylmagnesium chloride (0.475 M solution in THF) was prepared from 2-chlorothiophene and magnesium turning in the presence of 1,2-dibromoethane, and titrated with hydrochloric acid (1.0 M), sodium hydroxide (0.5 M) by using methyl red as a pH indicator.

## 2. General.

$^1\text{H}$  NMR spectra were obtained on a JEOL ECA-600 spectrometer. The internal standard of  $^1\text{H}$  NMR spectra in  $\text{CDCl}_3$  was tetramethylsilane (0.00 ppm). Conversion of 2,5-dibromothiophene and ratio of 2-(5-bromothieryl)-2-thiophene to alpha-terthiophene were determined by analytical GC performed on a Shimadzu GC-2010 gas chromatograph equipped with a Restek dimethylpolysiloxane fluid Rtx-1 column (15 m) and flame ionization detector (FID). The  $M_n$  and  $M_w/M_n$  values of poly(3-hexylthiophen-2,5-diyl) (P3HT) were measured on a Tosoh HLC-8020 gel permeation chromatography (GPC) unit (eluent, THF; calibration, polystyrene standards) with two TSK-gel columns ( $2 \times$  Multipore  $\text{H}_{\text{XL}}\text{-M}$ ). MALDI-TOF mass spectra were recorded on a Shimadzu/Kratos AXIMA-CFR plus in the reflectron ion mode by use of a laser ( $\lambda = 337$  nm). Dithranol (1,8-dihydroxy-9[10H]-anthracenone) was used as the matrix for the MALDI-TOF mass measurements.

### 3. Computational Details.

Density functional theory (DFT) calculations were performed using Gaussian 09 program package.<sup>S1</sup> Geometry optimizations and vibrational analyses of all local equilibrium and transition state structures were performed using the Becke's three-parameter hybrid functional,<sup>S2</sup> LYP correlation functional<sup>S3-S4</sup> (B3LYP) together with effective core potentials (ECPs) with the LANL2DZ basis sets for Ni, Pd and Br, and 6-31G(d) basis sets for the other atoms. The energy diagram of the reaction pathway was obtained by the global reaction route mapping method (GRRM)<sup>S5-S12</sup> based on Gaussian 09. Second-order perturbation analysis of **TS4** was calculated with the natural bond orbital (NBO) 5.9 program package<sup>S13-S15</sup> at the same level as used for geometry optimization. The calculated geometries of starting material (**SM**), intermediates (**CP1–CP7**) and transition states (**TS1–TS5**) are shown in Figures S13–S27. All stationary points were optimized without any symmetry assumptions and were characterized by normal coordinate analysis at the same level of theory (number of imaginary frequencies, NIMAG, 0 for minima and 1 for transition states). The intrinsic reaction coordinate (IRC) method<sup>S16-S18</sup> was used to track minimum energy paths from transition structures to the corresponding local minima. The values of electronic energies ( $\Delta E$ ) were evaluated by single-point energy calculations using B3LYP functional together with ECPs with SDD basis sets for Ni, Pd, Br and 6-311++G(d,p) basis sets for the other atoms. The values of electronic energies ( $\Delta E$ ) were shown in kcal/mol unless otherwise noted. Cartesian coordinates and energies of the computed structures are listed in Appendix (pages S50–S94).

## 4. Synthesis.

### 4-1. General procedure for the model reaction (Table 1).

All glass apparatuses were dried prior to use. Addition of reagents into a reaction flask and withdrawal of a small aliquot of the reaction mixture for analysis were carried out via a syringe from a three-way stopcock under a stream of nitrogen. A round-bottomed flask equipped with a three-way stopcock was heated under reduced pressure, and then cooled to room temperature under an argon atmosphere. Ni or Pd catalyst (0.0095 mmol) was placed in the flask, and the atmosphere in the flask was replaced with argon. A solution of 2,5-dibromothiophene (91.9mg, 0.38 mmol) and naphthalene (used as an internal standard for GC analysis, 24.4 mg, 0.19 mmol) in dry THF (3.1 mL) was added via a syringe, and the reaction mixture was stirred at 0 °C. To the mixture was added 2-chloromagnesiothiophene (0.475 M solution in THF, 0.8 mL, 0.38 mmol) via a syringe, and stirring was continued at room temperature. The reaction was allowed to proceed for 2 h, followed by quenching in 5 M hydrochloric acid. The organic layer was extracted with diethyl ether and subjected to GC to determine the product composition and distribution.

### 4-2. General procedure for the polymerization (Table 2).

All glass apparatuses were dried prior to use. Addition of reagents into a reaction flask and withdrawal of a small aliquot of the reaction mixture for analysis were carried out via a syringe from a three-way stopcock under a stream of nitrogen. A round-bottomed flask equipped with a three-way stopcock was heated under reduced pressure, and then cooled to room temperature under an argon atmosphere. A solution of **1** (149.2 mg, 0.4 mmol) in dry THF (2.7 mL) was added via a syringe, and the reaction mixture was stirred at 0 °C. Isopropylmagnesium chloride (2.0 M solution in THF, 0.2 mL, 0.4 mmol) was added via a syringe, and stirring was continued at room temperature for 90 min. A suspension of NiCl<sub>2</sub>(dppp) or a solution of NiCl<sub>2</sub>(PPh<sub>3</sub>)IPr or PEPPSI-IPr (0.0114 mmol, 2.85 mol%) in dry THF (2.4 mL) was added via a syringe, and

stirring was continued at room temperature. After 90 min, 5 M hydrochloric acid was added. The mixture was extracted with chloroform, and the organic layer was washed with water, dried over anhydrous  $\text{MgSO}_4$ , and concentrated under reduced pressure. The residue was dissolved in  $\text{CHCl}_3$ , and the solution was added to methanol. Insoluble material was collected by filtration, washed with methanol, and dried in a desiccator to give P3HT as a dark purple solid.  $^1\text{H}$  NMR (600 MHz,  $\text{CDCl}_3$ )  $\delta$  6.98 (s, 1 H), 2.80 (t,  $J = 7.7$  Hz, 2 H), 1.71 (m, 2 H), 1.48-1.38 (m, 2 H), 1.37-1.30 (m, 4 H), 0.91 (t,  $J = 7.2$  Hz, 3 H).

### 4-3. Synthesis of monomers.

#### Synthesis of S3

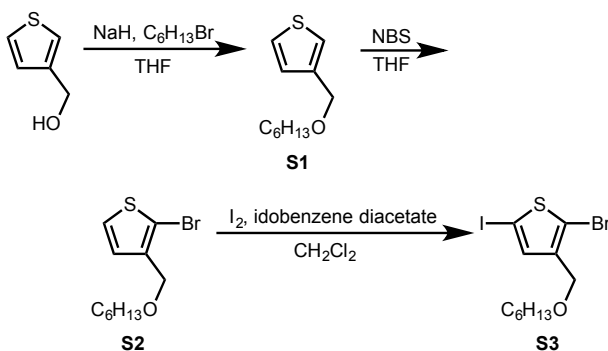

To a flask 50% sodium hydride (2.237 g, 59.95 mmol) was added and washed with dry hexane, to which dry THF (85 mL) was added. To the mixture 3-thiophenemethanol (5.00 g, 43.8 mmol) was added dropwise over 30 min, and the mixture was stirred at room temperature for 30 min. To the mixture 1-bromohexane (7.8 mL, 55 mmol) was added, and the mixture was refluxed for 12 h. The reaction mixture was cooled to room temperature, quenched with water, and extracted with ether. The collected organic layer was washed with brine, and dried over  $\text{MgSO}_4$ . After filtration, the solvent was removed under reduced pressure, and resultant residue was purified by distillation (55 °C/ 20 mmHg) to afford S1 (4.15g, 48%) as a colorless liquid.  $^1\text{H}$  NMR (600 MHz,  $\text{CDCl}_3$ )  $\delta$  7.29 (dd,  $J = 5.0$  and  $2.9$  Hz, 1H), 7.20 (d,  $J = 2.8$  Hz, 1 H), 7.07 (d,  $J = 4.8$  Hz, 1

H), 4.50 (s, 1H), 3.45 (t,  $J = 6.7$  Hz, 2 H), 1.60 (quint,  $J = 6.9$  Hz, 2 H), 1.36-1.26 (m, 6 H), 0.88 (t,  $J = 6.8$  Hz, 3 H);  $^{13}\text{C}$  NMR (150 MHz,  $\text{CDCl}_3$ )  $\delta$  139.9, 127.3, 125.8, 122.5, 70.4, 68.1, 31.7, 29.7, 25.8, 22.6, 14.0.

To a mixture of **S1** (3.968 g, 19.99 mmol) and dry THF (40 mL) was added NBS (3.596 g, 20.20 mmol), and the mixture was stirred at room temperature for 1.5 h. Additional dry THF (15 mL) was added to the mixture, which was stirred at room temperature for 4 h, quenched with 10wt% sodium thiosulfate aqueous solution, and extracted with hexane. The collected organic layer was washed with 10w% sodium thiosulfate aqueous solution and water, and dried over  $\text{MgSO}_4$ . After filtration, the solvent was removed under reduced pressure, and the residue was purified with distillation (82 °C, 0.3 mmHg) to afford **S2** (3.051 g, 56%) as a colorless viscous liquid.  $^1\text{H}$  NMR (600 MHz,  $\text{CDCl}_3$ )  $\delta$  7.24 (d,  $J = 5.5$  Hz, 1 H), 6.99 (d,  $J = 5.5$  Hz, 1 H), 4.44 (s, 1 H), 3.45 (t,  $J = 6.5$  Hz, 2 H), 1.59 (quint,  $J = 7.0$  Hz, 2 H), 1.37-1.24 (m, 6 H), 0.88 (t,  $J = 6.9$  Hz, 3 H);  $^{13}\text{C}$  NMR (150 MHz,  $\text{CDCl}_3$ )  $\delta$  138.6, 128.2, 125.8, 110.8, 70.5, 66.7, 31.6, 29.4, 25.8, 22.6, 14.0.

To a mixture of **S2** (2.778 g, 10.02 mmol) and dry  $\text{CH}_2\text{Cl}_2$  (26 mL) was added iodine (1.663 g, 6.55 mmol) and iodobenzene diacetate (1.937 g, 6.01 mmol) at 0 °C. The mixture was stirred at 0 °C for 8 h, quenched with 10w% sodium thiosulfate aqueous solution and extracted with  $\text{CH}_2\text{Cl}_2$ . The collected organic layer was washed with brine, and dried over  $\text{MgSO}_4$ . After filtration, the solvent was removed under reduced pressure, and the residue was purified with column chromatography ( $\text{SiO}_2$ ; hexane/ $\text{CH}_2\text{Cl}_2 = 19/1$ ) to afford **S3** (3.929 g, 97%) as a colorless liquid.  $^1\text{H}$  NMR (600 MHz,  $\text{CDCl}_3$ )  $\delta$  7.16 (s, 1 H), 4.38 (s, 1 H), 3.43 (t,  $J = 6.5$  Hz, 2 H), 1.59 (quint,  $J = 7.1$  Hz, 2 H), 1.37-1.25 (m, 6 H), 0.89 (t,  $J = 6.9$  Hz, 3 H);  $^{13}\text{C}$  NMR (150 MHz,  $\text{CDCl}_3$ )  $\delta$  140.8, 137.8, 113.4, 71.9, 70.7, 66.3, 31.6, 29.6, 25.8, 22.6, 14.1.

## Synthesis of S7

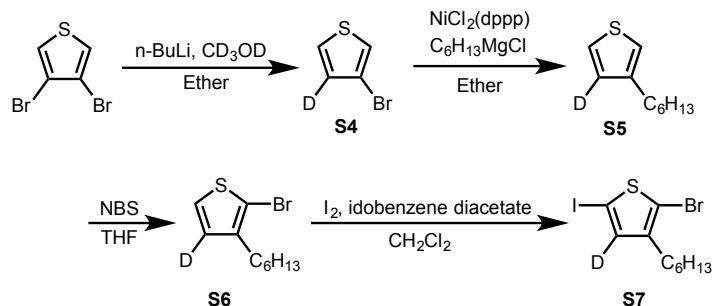

All glass apparatuses were dried prior to use. A round-bottomed flask equipped with a three-way stopcock was heated under reduced pressure, and then cooled to room temperature under an argon atmosphere. To the flask a mixture of 3,4-dibromothiophene (9.081 g, 37.54 mmol) and dry ether (75 mL) was added and stirred at  $-78\text{ }^{\circ}\text{C}$ . To the mixture 1.63 M n-buthyl lithium in hexane (25.5 mL, 41.57 mmol) was added at  $-78\text{ }^{\circ}\text{C}$ , and stirred for 25 min. To the mixture CD<sub>3</sub>CD (5.0 mL, 191 mmol) was added dropwise, and stirred at  $-78\text{ }^{\circ}\text{C}$  for 5 min and at room temperature for 1 h, quenched with water, and extracted with ether. The collected organic layer was washed with water, dried over MgSO<sub>4</sub>, and filtered. The solvent was removed under reduced pressure to afford **S4** (8.46 g) as a pale red viscous liquid. This compound was used for next reaction without further purification.

All glass apparatuses were dried prior to use. A round-bottomed flask equipped with a three-way stopcock was heated under reduced pressure, and then cooled to room temperature under an argon atmosphere. To the flask NiCl<sub>2</sub>(dppp) (207.9 mg, 0.384 mmol) was added, and the flask was replaced with Ar gas, to which a mixture of **S4** (8.455 g, 37.5 mmol) and dry ether (5.0 mL) was added with nitrogen gas flowing. To the mixture 1.62 M n-hexyl magnesium bromide in ether (24 mL, 39 mmol) was added. The mixture was stirred at room temperature overnight, quenched with 1 M HCl solution at  $0\text{ }^{\circ}\text{C}$ , and extracted with ether. The collected organic layer was washed with saturated NaHCO<sub>3</sub>aq and brine, and dried over MgSO<sub>4</sub>, and filtered. The

solvent was removed under reduce pressure, and the residue was purified by column chromatography (SiO<sub>2</sub>; hexane) and distillation (98-99 °C, 10 mmHg) to afford **S5** (3.872 g, 61%) as a colorless liquid. <sup>1</sup>H NMR (600 MHz, CDCl<sub>3</sub>) δ 7.23 (d, *J* = 2.7 Hz, 1 H), 6.91 (d, *J* = 2.7 Hz, 1 H), 2.62 (t, *J* = 7.7 Hz, 2 H), 1.61 (quint, *J* = 7.5 Hz, 2 H), 1.36-1.26 (m, 6 H), 0.90-0.87 (m, 3 H); <sup>13</sup>C NMR (150 MHz, CDCl<sub>3</sub>) δ 143.2, 128.9, 128.2, 128.0, 124.9, 119.7, 31.9, 31.7, 30.5, 30.3, 29.71, 29.67, 29.4, 29.0, 22.7, 22.6, 14.11, 14.8.

To a mixture of **S5** (3.389 g, 20.00 mmol) and dry THF (33 mL) was added NBS (3.596 g, 20.20 mmol), and the mixture was stirred at room temperature for 1.5 h. Additional dry THF (30 mL) was added to the mixture. The mixture was stirred at room temperature for 2.5 h, quenched with 10wt% sodium thiosulfate aqueous solution, and extracted with ether. The collected organic layer was washed with 10wt% sodium thiosulfate aqueous solution and 10wt% KOH<sub>aq</sub>, and dried over MgSO<sub>4</sub>. After filtration, the solvent was removed under reduced pressure, and purified with distillation (67 °C, 0.3 mmHg) to afford **S6** (3.766 g, 76%) as a colorless viscous liquid. <sup>1</sup>H NMR (600 MHz, CDCl<sub>3</sub>) δ 7.17 (s, 1 H), 2.56 (t, *J* = 7.7 Hz, 2 H), 1.57 (quint, *J* = 7.6 Hz, 2 H), 1.35-1.26 (m, 6 H), 0.89 (t, *J* = 7.6 Hz, 3 H); <sup>13</sup>C NMR (150 MHz, CDCl<sub>3</sub>) δ 141.9, 128.2, 128.0, 127.8, 125.0, 108.8, 31.6, 29.7, 29.4, 28.9, 22.6, 14.1.

To a mixture of **S6** (991.9 mg, 4.00 mmol) and dry CH<sub>2</sub>Cl<sub>2</sub> (20 mL) was added iodine (577.2 mg, 4.55 mmol) and iodobenzene diacetate (777.7 mg, 2.41 mmol) at 0 °C. The mixture was stirred at room temperature overnight, quenched with saturated NaHCO<sub>3aq</sub>, and extracted with ether. The collected organic layer was washed with saturated NaHCO<sub>3aq</sub>, dried over MgSO<sub>4</sub> and filtered. The solvent was removed under reduced pressure, and the residue was purified with column chromatography (SiO<sub>2</sub>; hexane) and distillation (120 °C, 0.25 mmHg) to afford **S7** (873.4 mg, 58%) as a colorless liquid. <sup>1</sup>H NMR (600 MHz, CDCl<sub>3</sub>) δ 2.52 (t, *J* = 7.7 Hz, 2 H), 1.55 (quint, *J* = 7.1 Hz, 2 H), 1.34-1.26 (m, 6 H), 0.88 (t, *J* = 6.9 Hz, 3 H); <sup>13</sup>C NMR (150 MHz, CDCl<sub>3</sub>) δ



144.2, 143.0, 138.0, 137.9, 137.7, 137.5, 111.7, 110.2, 70.9, 31.6, 29.60, 29.58, 29.53, 29.4, 29.2, 29.1, 28.80, 28.77, 22.5, 14.1.

#### 4-4. General procedure for the copolymerization (Fig. 3a).

All glass apparatuses were dried prior to use. Addition of reagents into a reaction flask and withdrawal of a small aliquot of the reaction mixture for analysis were carried out via a syringe from a three-way stopcock under a stream of nitrogen. A round-bottomed flask equipped with a three-way stopcock was heated under reduced pressure, and then cooled to room temperature under an argon atmosphere. A solution of **1** (223.88 mg, 0.600 mmol) and naphthalene (24.94 mg, 0.195 mmol) as an internal standard in dry THF (3.6 mL) was added via a syringe, and the reaction mixture was stirred at 0 °C. Isopropylmagnesium chloride (2.0 M solution in THF, 0.3 mL, 0.6 mmol) was added via a syringe, and stirring was continued at room temperature for 90 min. A suspension of NiCl<sub>2</sub>(dppp) or a solution of NiCl<sub>2</sub>(PPh<sub>3</sub>)IPr or PEPPSI-IPr (0.03 mmol) in dry THF (3.6 mL) was added via a syringe, and stirring was continued at room temperature for 1 h. To another flask a monomer (**S3**, **S7** or 1,4-dibromo-2,5-dihexyloxybenzene<sup>S19</sup>) (0.4 mmol) and dry THF (2.7 mL) was added, to which 2 M isopropyl magnesium chloride in THF (0.2 mL, 0.4 mmol) at 0 °C, and the mixture was stirred at room temperature for 1 h. The prepared chloromagnesium monomer (**2**, **1-d**, **3**<sup>S19</sup>) solution was added to the flask containing prepolymer via cannula, and stirred at room temperature. After 5 min, 5 M hydrochloric acid was added. The mixture was extracted with chloroform, and concentrated under reduced pressure. The residue was dissolved in CHCl<sub>3</sub>, and the solution was added to methanol. Insoluble material was collected by filtration, washed with methanol, and dried in a desiccator to give a desired copolymer.

## 5. Supporting Figures and Tables.

### 5-1. Energy decomposition analysis (EDA) in each step (unit = kcal/mol).

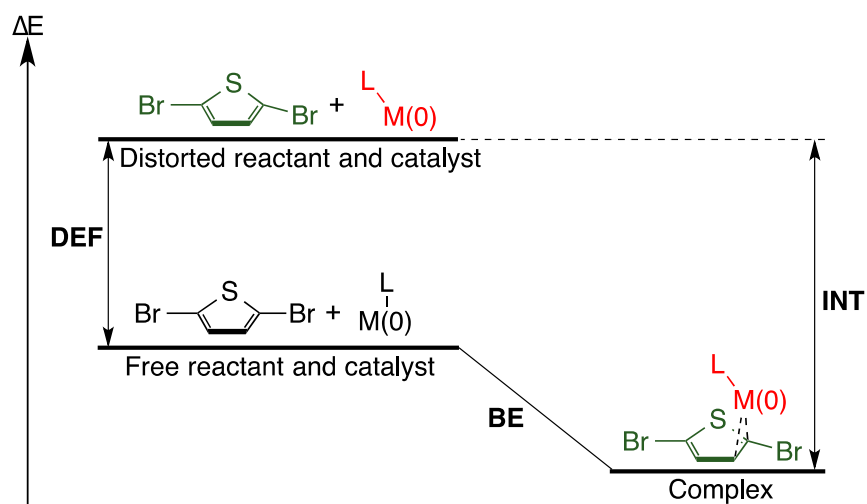

**Fig. S1** A representative model of EDA (formation of **CP1**). BE, DEF and INT indicate binding energy, deformation energy and interaction energy, respectively. The DEF of thiophene units and the catalyst were designated by  $DEF_{Th}$  and  $DEF_{cat}$  respectively. The total DEF was designated by  $DEF_{total}$  ( $DEF_{Th} + DEF_{cat}$ ).

**Table S1.** EDA of **CP1** and **TS1** in OA step.**CP1**

|                      | Ni(0)dppp | Ni(0)NHC | Pd(0)dppp | Pd(0)NHC |
|----------------------|-----------|----------|-----------|----------|
| DEF <sub>Th</sub>    | 18.6      | 15.2     | 17.6      | 10.8     |
| DEF <sub>cat</sub>   | 11.2      | 4.3      | 9.6       | 2.2      |
| DEF <sub>total</sub> | 29.9      | 19.4     | 27.2      | 13.0     |
| INT                  | -60.6     | -56.6    | -42.8     | -36.9    |
| BE                   | -30.8     | -37.2    | -15.6     | -23.9    |

**TS1**

|                      | Ni(0)dppp | Ni(0)NHC | Pd(0)dppp | Pd(0)NHC |
|----------------------|-----------|----------|-----------|----------|
| DEF <sub>Th</sub>    | 27.0      | 17.3     | 24.7      | 18.0     |
| DEF <sub>cat</sub>   | 12.2      | 4.1      | 9.6       | 2.3      |
| DEF <sub>total</sub> | 39.2      | 21.4     | 34.3      | 20.3     |
| INT                  | -61.8     | -55.0    | -39.1     | -40.0    |
| BE                   | -22.5     | -33.6    | -4.7      | -19.7    |

**Table S2.** EDA of **TS2** in RE step.

|                      | Ni(0)dppp | Ni(0)NHC | Pd(0)dppp | Pd(0)NHC |
|----------------------|-----------|----------|-----------|----------|
| DEF <sub>Th</sub>    | 54.9      | 55.8     | 61.0      | 72.1     |
| DEF <sub>cat</sub>   | 15.6      | 6.2      | 12.2      | 4.4      |
| DEF <sub>total</sub> | 70.5      | 62.0     | 73.2      | 76.5     |
| INT                  | -63.6     | -69.9    | -50.0     | -64.2    |
| BE                   | -6.9      | -7.9     | -23.2     | -12.3    |

**Table S3.** EDA of **CP4**, **TS3** and **CP6** in unidirectional pathway.**CP4**

|                      | Ni(0)dppp | Ni(0)NHC | Pd(0)dppp | Pd(0)NHC |
|----------------------|-----------|----------|-----------|----------|
| DEF <sub>Th</sub>    | 13.6      | 8.9      | 10.2      | 6.0      |
| DEF <sub>cat</sub>   | 10.4      | 3.4      | 7.1       | 1.6      |
| DEF <sub>total</sub> | 23.9      | 12.3     | 17.3      | 7.6      |
| INT                  | -47.5     | -42.4    | -27.8     | -27.0    |
| BE                   | -23.5     | -30.2    | -10.5     | -19.5    |

**TS3**

|                      | Ni(0)dppp | Ni(0)NHC | Pd(0)dppp | Pd(0)NHC |
|----------------------|-----------|----------|-----------|----------|
| DEF <sub>Th</sub>    | 6.3       | 5.2      | 0.4       | 1.6      |
| DEF <sub>cat</sub>   | 8.0       | 3.3      | 1.4       | 0.8      |
| DEF <sub>total</sub> | 14.2      | 8.5      | 1.7       | 2.4      |
| INT                  | -26.3     | -28.8    | -5.5      | -16.2    |
| BE                   | -12.1     | -20.3    | -3.7      | -13.8    |

**CP6**

|                      | Ni(0)dppp | Ni(0)NHC | Pd(0)dppp | Pd(0)NHC |
|----------------------|-----------|----------|-----------|----------|
| DEF <sub>Th</sub>    | 17.1      | 13.8     | 15.5      | 9.8      |
| DEF <sub>cat</sub>   | 11.2      | 4.2      | 8.6       | 2.1      |
| DEF <sub>total</sub> | 28.2      | 18.0     | 24.1      | 11.9     |
| INT                  | -57.7     | -54.1    | -38.4     | -35.1    |
| BE                   | -29.5     | -36.1    | -14.2     | -23.2    |

**Table S4.** EDA of **TS4**, **CP5**, **TS5** and **CP7** in bidirectional pathway.**TS4**

|                      | Ni(0)dppp | Ni(0)NHC | Pd(0)dppp | Pd(0)NHC |
|----------------------|-----------|----------|-----------|----------|
| DEF <sub>Th</sub>    | 3.3       | 4.6      | 0.6       | 1.4      |
| DEF <sub>cat</sub>   | 7.9       | 4.0      | 1.5       | 1.2      |
| DEF <sub>total</sub> | 11.1      | 8.6      | 2.1       | 2.6      |
| INT                  | -22.5     | -34.4    | -4.9      | -17.9    |
| BE                   | -11.4     | -25.9    | -2.7      | -15.3    |

**CP5**

|                      | Ni(0)dppp | Ni(0)NHC | Pd(0)dppp | Pd(0)NHC |
|----------------------|-----------|----------|-----------|----------|
| DEF <sub>Th</sub>    | 12.9      | 8.3      | 9.3       | 5.6      |
| DEF <sub>cat</sub>   | 9.6       | 3.1      | 6.8       | 1.4      |
| DEF <sub>total</sub> | 22.6      | 11.3     | 16.1      | 7.0      |
| INT                  | -44.4     | -40.1    | -25.3     | -25.5    |
| BE                   | -21.8     | -28.8    | -9.2      | -18.5    |

**TS5**

|                      | Ni(0)dppp | Ni(0)NHC | Pd(0)dppp | Pd(0)NHC |
|----------------------|-----------|----------|-----------|----------|
| DEF <sub>Th</sub>    | 5.1       | 4.3      | 0.2       | 1.5      |
| DEF <sub>cat</sub>   | 7.3       | 2.8      | 1.3       | 0.7      |
| DEF <sub>total</sub> | 12.4      | 7.1      | 1.5       | 2.3      |
| INT                  | -24.1     | -27.6    | -5.2      | -16.3    |
| BE                   | -11.7     | -20.5    | -3.6      | -14.1    |

**CP7**

|                      | Ni(0)dppp | Ni(0)NHC | Pd(0)dppp | Pd(0)NHC |
|----------------------|-----------|----------|-----------|----------|
| DEF <sub>Th</sub>    | 11.7      | 8.4      | 8.5       | 4.8      |
| DEF <sub>cat</sub>   | 9.9       | 3.4      | 6.8       | 1.6      |
| DEF <sub>total</sub> | 21.6      | 11.8     | 15.3      | 6.4      |
| INT                  | -46.8     | -42.4    | -28.0     | -28.4    |
| BE                   | -25.2     | -30.6    | -12.7     | -22.0    |

## 5-2. Differential EDA (unit = kcal/mol)

**Table S5.** Differential EDA between **TS1** and **CP1** in OA step (**TS1–CP1**).

|                                   | Ni(0)dppp | Ni(0)NHC | Pd(0)dppp | Pd(0)NHC |
|-----------------------------------|-----------|----------|-----------|----------|
| $\Delta\text{DEF}_{\text{Th}}$    | 8.4       | 2.1      | 7.1       | 7.2      |
| $\Delta\text{DEF}_{\text{cat}}$   | 1.0       | -0.1     | 0.04      | 0.1      |
| $\Delta\text{DEF}_{\text{total}}$ | 9.4       | 1.2      | 7.2       | 7.3      |
| $\Delta\text{INT}$                | -1.1      | 1.6      | 3.7       | -3.2     |
| $\Delta\text{BE}$                 | 8.3       | 3.6      | 10.9      | 4.2      |

**Table S6.** Differential EDA between **TS3**, **CP4** and **CP6** in unidirectional pathway.

### TS3–CP4

|                                   | Ni(0)dppp | Ni(0)NHC | Pd(0)dppp | Pd(0)NHC |
|-----------------------------------|-----------|----------|-----------|----------|
| $\Delta\text{DEF}_{\text{Th}}$    | -7.3      | -3.7     | -9.9      | -4.3     |
| $\Delta\text{DEF}_{\text{cat}}$   | -2.4      | -0.1     | -5.7      | -0.8     |
| $\Delta\text{DEF}_{\text{total}}$ | -9.7      | -3.8     | -15.6     | -5.2     |
| $\Delta\text{INT}$                | 21.1      | 13.6     | 22.3      | 10.9     |
| $\Delta\text{BE}$                 | 11.5      | 9.9      | 6.8       | 5.7      |

### TS3–CP6

|                                   | Ni(0)dppp | Ni(0)NHC | Pd(0)dppp | Pd(0)NHC |
|-----------------------------------|-----------|----------|-----------|----------|
| $\Delta\text{DEF}_{\text{Th}}$    | -10.8     | -8.6     | -15.2     | -8.2     |
| $\Delta\text{DEF}_{\text{cat}}$   | -3.2      | -0.9     | -7.3      | -1.3     |
| $\Delta\text{DEF}_{\text{total}}$ | -14.0     | -9.5     | -22.4     | -9.4     |
| $\Delta\text{INT}$                | 31.4      | 25.3     | 32.9      | 18.9     |
| $\Delta\text{BE}$                 | 17.4      | 15.7     | 10.5      | 9.4      |

**Table S7.** Differential EDA between **CP4**, **CP5**, **CP7**, **TS4** and **TS5** in bidirectional pathway.**TS4–CP4**

|                                   | Ni(0)dppp | Ni(0)NHC | Pd(0)dppp | Pd(0)NHC |
|-----------------------------------|-----------|----------|-----------|----------|
| $\Delta\text{DEF}_{\text{Th}}$    | -10.3     | -4.3     | -9.6      | -4.6     |
| $\Delta\text{DEF}_{\text{cat}}$   | -2.5      | 0.62     | -5.6      | -0.4     |
| $\Delta\text{DEF}_{\text{total}}$ | -12.8     | -3.7     | -15.2     | -5.0     |
| $\Delta\text{INT}$                | 24.9      | 8.0      | 22.9      | 9.2      |
| $\Delta\text{BE}$                 | 12.1      | 4.3      | 7.7       | 4.2      |

**TS4–CP5**

|                                   | Ni(0)dppp | Ni(0)NHC | Pd(0)dppp | Pd(0)NHC |
|-----------------------------------|-----------|----------|-----------|----------|
| $\Delta\text{DEF}_{\text{Th}}$    | -9.7      | -3.7     | -8.7      | -4.2     |
| $\Delta\text{DEF}_{\text{cat}}$   | -1.7      | 0.9      | -5.3      | -0.2     |
| $\Delta\text{DEF}_{\text{total}}$ | -11.4     | -2.8     | -14.0     | -4.4     |
| $\Delta\text{INT}$                | 21.9      | 5.7      | 20.4      | 7.6      |
| $\Delta\text{BE}$                 | 10.4      | 2.9      | 6.5       | 3.2      |

**TS5–CP5**

|                                   | Ni(0)dppp | Ni(0)NHC | Pd(0)dppp | Pd(0)NHC |
|-----------------------------------|-----------|----------|-----------|----------|
| $\Delta\text{DEF}_{\text{Th}}$    | -7.9      | -4.0     | -9.1      | -4.1     |
| $\Delta\text{DEF}_{\text{cat}}$   | -2.3      | -0.2     | -5.5      | -0.7     |
| $\Delta\text{DEF}_{\text{total}}$ | -10.2     | -4.2     | -14.6     | -4.8     |
| $\Delta\text{INT}$                | 20.3      | 12.5     | 20.1      | 9.2      |
| $\Delta\text{BE}$                 | 10.1      | 8.2      | 5.6       | 4.4      |

**TS5–CP7**

|                                   | Ni(0)dppp | Ni(0)NHC | Pd(0)dppp | Pd(0)NHC |
|-----------------------------------|-----------|----------|-----------|----------|
| $\Delta\text{DEF}_{\text{Th}}$    | -6.6      | -4.1     | -8.3      | -3.4     |
| $\Delta\text{DEF}_{\text{cat}}$   | -2.6      | -0.6     | -5.5      | -0.8     |
| $\Delta\text{DEF}_{\text{total}}$ | -9.2      | -4.6     | -13.8     | -4.2     |
| $\Delta\text{INT}$                | 22.7      | 14.8     | 22.8      | 12.0     |
| $\Delta\text{BE}$                 | 13.5      | 10.1     | 9.1       | 7.9      |

**5-3. Comparison among important bond lengths in OA and RE (unit = Å).**

**Table S8.** Comparison among bond lengths of C-Br bond of **CP1** and **TS1**.

|                            | Ni(0)dppp | Ni(0)NHC | Pd(0)dppp | Pd(0)NHC |
|----------------------------|-----------|----------|-----------|----------|
| <b>CP1</b>                 | 2.033     | 2.041    | 2.022     | 2.004    |
| <b>TS1</b>                 | 2.303     | 2.184    | 2.277     | 2.197    |
| $\Delta(\mathbf{TS1-CP1})$ | 0.270     | 0.143    | 0.255     | 0.193    |

**Table S9.** Comparison among bond lengths of C-C bond of **CP3** and **TS2**.

|                            | Ni(0)dppp | Ni(0)NHC | Pd(0)dppp | Pd(0)NHC |
|----------------------------|-----------|----------|-----------|----------|
| <b>CP3</b>                 | 2.631     | 2.625    | 2.716     | 2.729    |
| <b>TS2</b>                 | 1.878     | 1.915    | 1.924     | 2.061    |
| $\Delta(\mathbf{CP3-TS2})$ | 0.753     | 0.710    | 0.792     | 0.668    |



**5-4. Important bond lengths of CPs and TSs (unit = Å).**

**Table S10.** Important bond lengths of **CP1**.

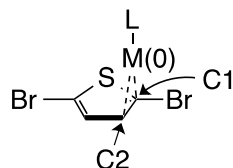

| Catalyst  | C1-M(0) | C2-M(0) | C1-Br | M(0)-Br |
|-----------|---------|---------|-------|---------|
| Ni(0)dppp | 1.912   | 2.020   | 2.033 | 3.311   |
| Ni(0)NHC  | 1.862   | 2.029   | 2.041 | 3.264   |
| Pd(0)dppp | 2.130   | 2.197   | 2.022 | 3.519   |
| Pd(0)NHC  | 2.080   | 2.273   | 2.004 | 3.348   |

**Table S11.** Important bond lengths of **TS1**.

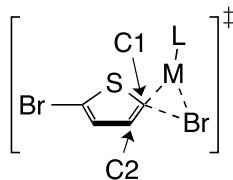

| Catalyst  | C1-M  | C2-M  | C1-Br | M-Br  |
|-----------|-------|-------|-------|-------|
| Ni(0)dppp | 1.842 | 2.319 | 2.303 | 2.838 |
| Ni(0)NHC  | 1.808 | 2.280 | 2.184 | 2.876 |
| Pd(0)dppp | 2.055 | 2.659 | 2.277 | 2.956 |
| Pd(0)NHC  | 2.009 | 2.825 | 2.197 | 2.897 |

**Table S12.** Important bond lengths of **CP2**.

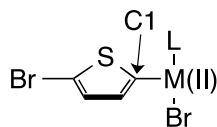

| Catalyst  | C1-M(II) | M(II)-Br |
|-----------|----------|----------|
| Ni(0)dppp | 1.914    | 2.429    |
| Ni(0)NHC  | 1.853    | 2.338    |
| Pd(0)dppp | 2.045    | 2.583    |
| Pd(0)NHC  | 1.985    | 2.518    |

**Table S13.** Important bond lengths of **CP3**.

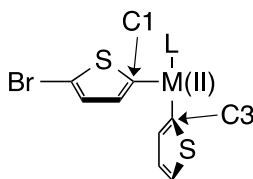

| Catalyst  | C1-M(II) | C3-M(II) | C1-C3 |
|-----------|----------|----------|-------|
| Ni(0)dppp | 1.913    | 1.918    | 2.631 |
| Ni(0)NHC  | 1.857    | 1.851    | 2.625 |
| Pd(0)dppp | 2.059    | 2.046    | 2.716 |
| Pd(0)NHC  | 1.986    | 2.002    | 2.729 |

**Table S14.** Important bond lengths of **TS2**.

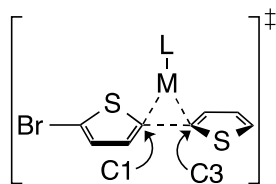

| Catalyst  | C1-M  | C3-M  | C1-C3 |
|-----------|-------|-------|-------|
| Ni(0)dppp | 1.906 | 1.910 | 1.878 |
| Ni(0)NHC  | 1.857 | 1.848 | 1.915 |
| Pd(0)dppp | 2.084 | 2.082 | 1.924 |
| Pd(0)NHC  | 2.030 | 2.011 | 2.061 |

**Table S15.** Important bond lengths of **CP4**.

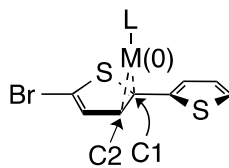

| Catalyst  | C1-M(0) | C2-M(0) |
|-----------|---------|---------|
| Ni(0)dppp | 2.023   | 1.999   |
| Ni(0)NHC  | 1.952   | 1.999   |
| Pd(0)dppp | 2.270   | 2.213   |
| Pd(0)NHC  | 2.199   | 2.252   |

**Table S16.** Important bond lengths of **CP5**.

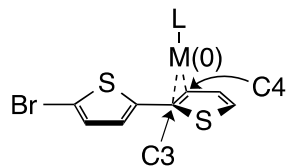

| Catalyst  | C3-M(0) | C4-M(0) |
|-----------|---------|---------|
| Ni(0)dppp | 2.039   | 2.005   |
| Ni(0)NHC  | 1.960   | 2.007   |
| Pd(0)dppp | 2.294   | 2.228   |
| Pd(0)NHC  | 2.213   | 2.263   |

**Table S17.** Important bond lengths of **TS3**.

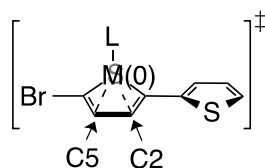

| Catalyst  | C2-M(0) | C5-M(0) |
|-----------|---------|---------|
| Ni(0)dppp | 2.116   | 2.169   |
| Ni(0)NHC  | 2.018   | 2.114   |
| Pd(0)dppp | 2.723   | 2.594   |
| Pd(0)NHC  | 2.367   | 2.329   |

**Table S18.** Important bond lengths of **CP6**.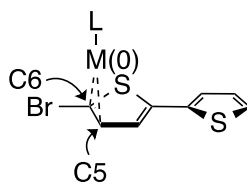

| Catalyst  | C6-M(0) | C5-M(0) |
|-----------|---------|---------|
| Ni(0)dppp | 1.914   | 2.035   |
| Ni(0)NHC  | 1.860   | 2.054   |
| Pd(0)dppp | 2.141   | 2.216   |
| Pd(0)NHC  | 2.081   | 2.309   |

**Table S19.** Important bond lengths of **TS4**.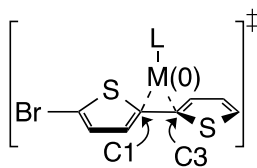

| Catalyst  | C1-M(0) | C3-M(0) | C1-C3 |
|-----------|---------|---------|-------|
| Ni(0)dppp | 2.155   | 2.093   | 1.457 |
| Ni(0)NHC  | 2.154   | 1.972   | 1.442 |
| Pd(0)dppp | 2.665   | 2.724   | 1.460 |
| Pd(0)NHC  | 2.339   | 2.318   | 1.453 |

**Table S20.** Important bond lengths of **TS5**.

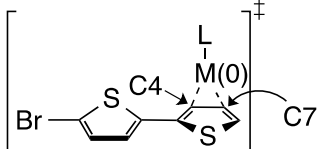

The diagram shows the transition state TS5, which is a five-membered ring containing a metal atom M(0) and two sulfur atoms (S). The metal atom M(0) is coordinated to a ligand L. The ring also includes a carbon atom C4 and another carbon atom C7. A bromine atom (Br) is attached to the ring. The structure is enclosed in brackets with a double dagger symbol (‡) as a superscript.

| Catalyst  | C4-M(0) | C7-M(0) |
|-----------|---------|---------|
| Ni(0)dppp | 2.132   | 2.173   |
| Ni(0)NHC  | 2.028   | 2.124   |
| Pd(0)dppp | 2.673   | 2.669   |
| Pd(0)NHC  | 2.311   | 2.410   |

**Table S21.** Important bond lengths of **CP7**.

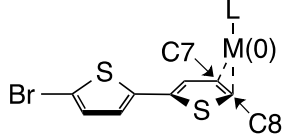

The diagram shows the complex CP7, which is a five-membered ring containing a metal atom M(0) and two sulfur atoms (S). The metal atom M(0) is coordinated to a ligand L. The ring also includes two carbon atoms, C7 and C8. A bromine atom (Br) is attached to the ring.

| Catalyst  | C7-M(0) | C8-M(0) |
|-----------|---------|---------|
| Ni(0)dppp | 2.028   | 1.984   |
| Ni(0)NHC  | 2.019   | 1.939   |
| Pd(0)dppp | 2.263   | 2.207   |
| Pd(0)NHC  | 2.280   | 2.181   |

### Important NBOs in TS4.

**Table 22.** Donation. (unit: kcal/mol)

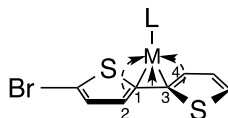

| Catalyst  | $\pi_{C1-C2} \rightarrow d$ | $\pi_{C3-C4} \rightarrow d$ | $\sigma_{C1-C3} \rightarrow d$ |
|-----------|-----------------------------|-----------------------------|--------------------------------|
| Ni(0)dppp | 9.0                         | 8.1                         | 16.8                           |
| Ni(0)NHC  | 11.8                        | 41.6                        | 12.5                           |
| Pd(0)dppp | 6.0                         | N.D.                        | N.D.                           |
| Pd(0)NHC  | 13.5                        | 16.0                        | 11.5                           |

(N.D. indicates not determined (the value was less than 5.0 kcal/mol))

**Table 23.** Backdonation. (unit: kcal/mol)

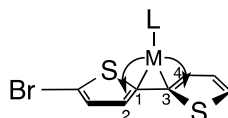

| Catalyst  | $d \rightarrow \pi^*_{C1-C2}$ | $d \rightarrow \pi^*_{C3-C4}$ |
|-----------|-------------------------------|-------------------------------|
| Ni(0)dppp | 10.4                          | 16.4                          |
| Ni(0)NHC  | 13.1                          | 37.7                          |
| Pd(0)dppp | N.D.                          | N.D.                          |
| Pd(0)NHC  | 7.5                           | 5.8                           |

(N.D. indicates not determined (the value was less than 5.0 kcal/mol))

## 5-5. GPC profiles.

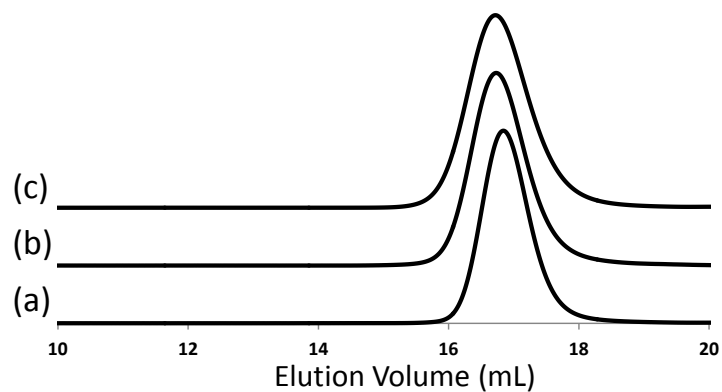

**Fig. S2** GPC profiles of the P3HT obtained by treatment of **1** with 1.0 equiv. of  $t\text{PrMgCl}$ , followed by polymerization with 2.85 mol% of catalysts in THF at rt for 90 min, (a)  $\text{NiCl}_2(\text{dppp})$  ( $M_n = 7270$ ,  $M_w/M_n = 1.12$ ), (b)  $\text{NiCl}_2(\text{PPh}_3)\text{IPr}$  ( $M_n = 7540$ ,  $M_w/M_n = 1.18$ ), (c) PEPPSI-IPr ( $M_n = 7630$ ,  $M_w/M_n = 1.19$ ).



## 5-6. MALDI-TOF mass spectra.

Not only Br/H end set but also Br/Br end set should be observed in MALDI-TOF mass spectra, if the  $\pi$ -arene complex were as stable as the complex of C–Pd(II)L–Br. In this case, however, the energy difference between these states is still high, and the catalyst should favor the oxidative addition state at either of end groups even if a  $\pi$ -arene complex formed. Therefore, Br/H end sets are observed in MALDI-TOF mass spectra.

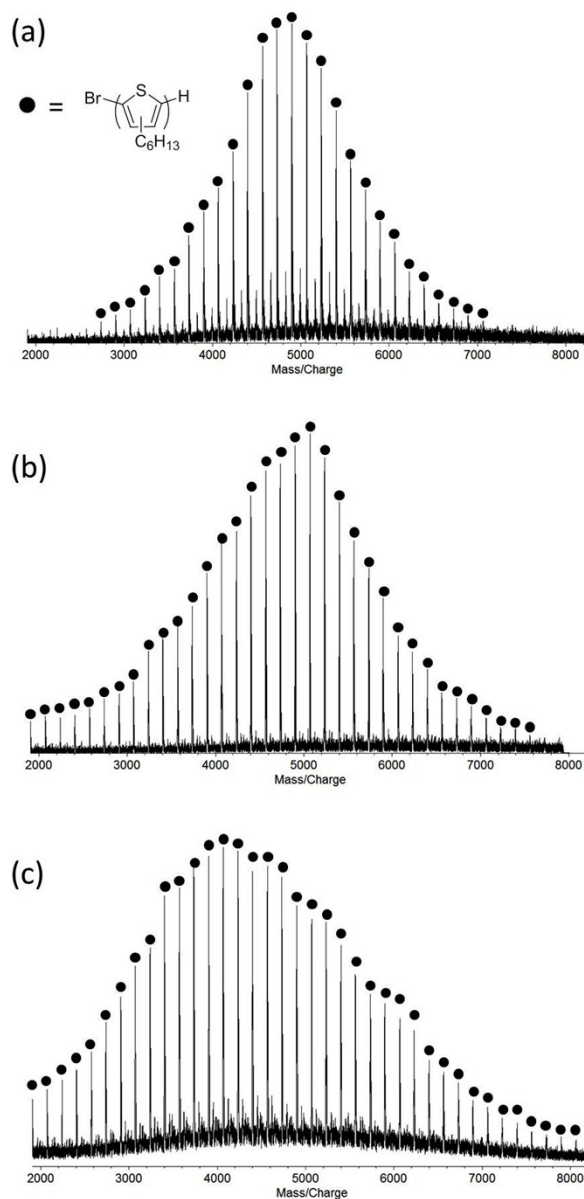

**Fig. S3** MALDI-TOF-MS spectra of the P3HT obtained by treatment of **1** with 1.0 equiv. of  $t\text{-PrMgCl}$ , followed by polymerization with 2.85 mol% of catalysts in THF at rt for 90 min, (a)  $\text{NiCl}_2(\text{dppp})$  ( $M_n = 7270$ ,  $M_w/M_n = 1.12$ ), (b)  $\text{NiCl}_2(\text{PPh}_3)\text{IPr}$  ( $M_n = 7540$ ,  $M_w/M_n = 1.18$ ), (c)  $\text{PEPPSI-IPr}$  ( $M_n = 7630$ ,  $M_w/M_n = 1.19$ ).

**5-7.  $^1\text{H}$  NMR spectra in  $\text{CDCl}_3$  of the polythiophenes obtained by polymerizations with  $\text{NiCl}_2(\text{dppp})$ ,  $\text{NiCl}_2(\text{PPh}_3)\text{IPr}$ , and PEPPSI-IPr.**

According to a literature,<sup>S20</sup> these ratio of the structure **A**, **B**, and **C** (Table 2 in the manuscript) were calculated using the integral ratio of signals **a**, **c**, and **d** ( $\text{A}:\text{B}:\text{C} = \text{a}:\text{c}:(\text{d}-\text{c})$ ) on the polythiophene obtained by the use of  $\text{NiCl}_2(\text{dppp})$ ,  $\text{NiCl}_2(\text{PPh}_3)\text{IPr}$ , and PEPPSI-IPr, respectively (Figure S4-S6).

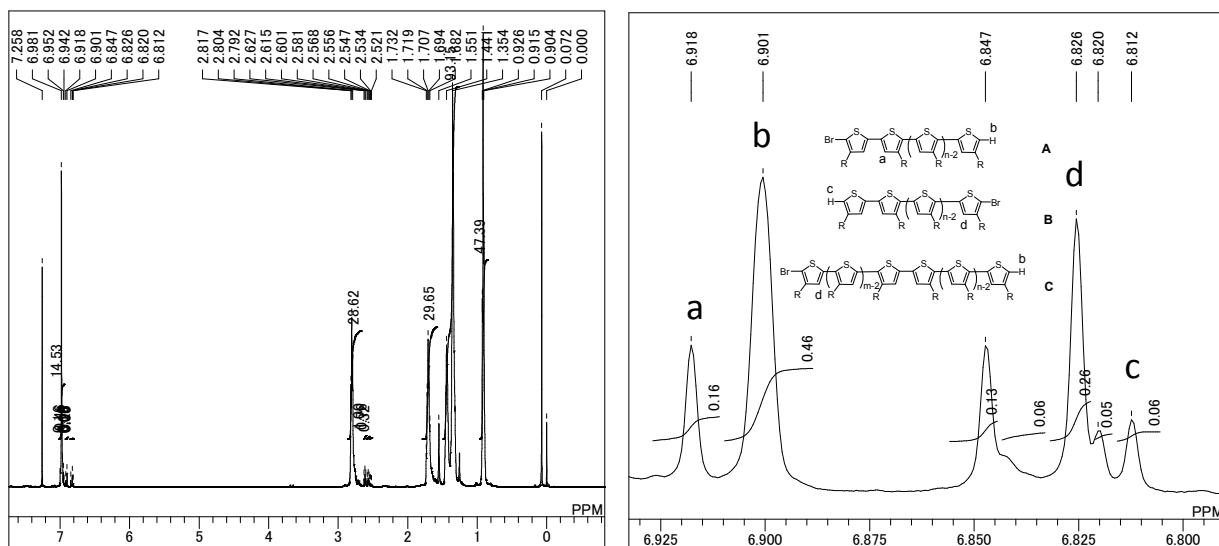

**Fig. S4**  $^1\text{H}$  NMR spectrum of P3HT ( $M_n = 7270$ ,  $M_w/M_n = 1.12$ ), which was purified by reprecipitation from MeOH, obtained by the polymerization with 2.85 mol% of  $\text{NiCl}_2(\text{dppp})$ .

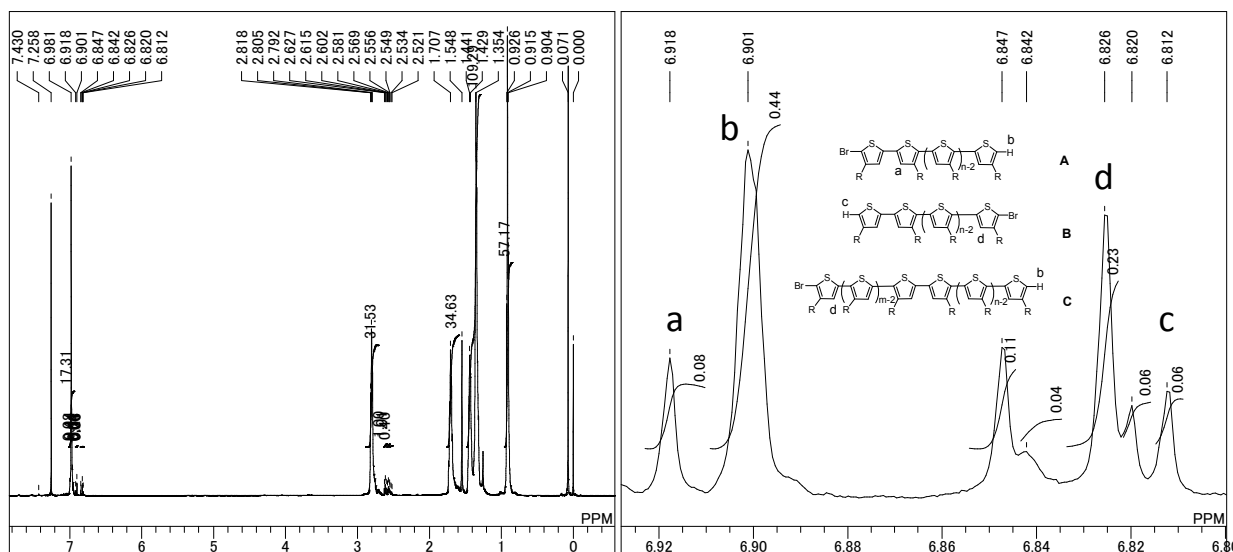

**Fig. S5**  $^1\text{H}$  NMR spectrum of P3HT ( $M_n = 7540$ ,  $M_w/M_n = 1.18$ ), which was purified by reprecipitation from MeOH, obtained by the polymerization with 2.85 mol% of  $\text{NiCl}_2(\text{PPh}_3)\text{IPr}$ .

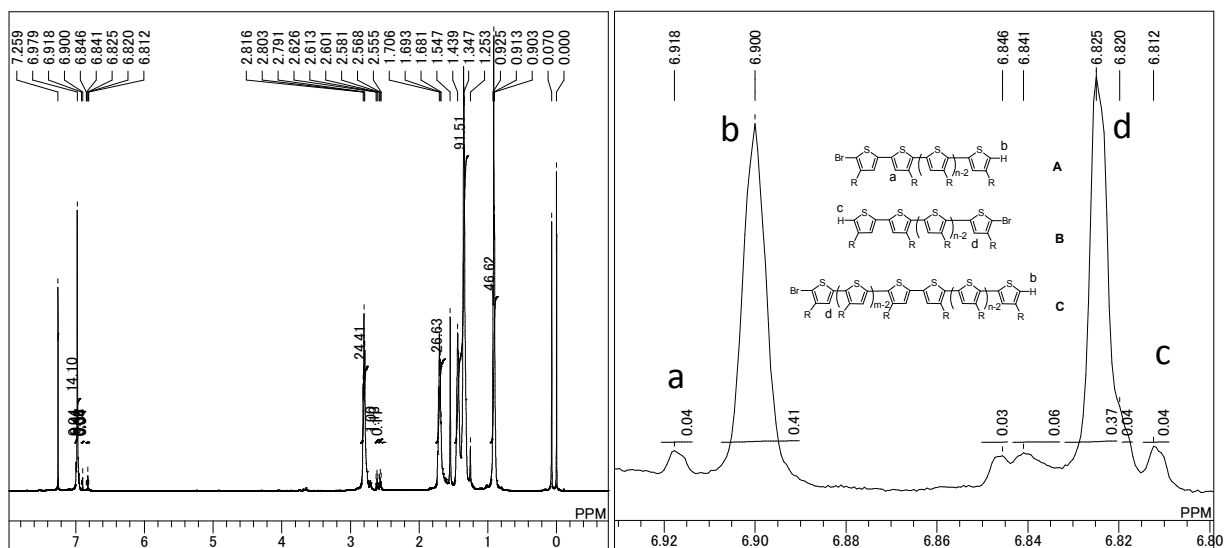

**Fig. S6**  $^1\text{H}$  NMR spectrum of P3HT (7630,  $M_w/M_n = 1.19$ ), which was purified by reprecipitation from MeOH, obtained by the polymerization with 2.85 mol% of PEPPSI-IPr.

### 5-8. GPC profiles and $^1\text{H}$ NMR spectra in $\text{CDCl}_3$ of block copolymers, and estimation of block copolymerization nature.

The block copolymerization nature discussed in the manuscript (Fig. 3) was estimated from  $^1\text{H}$  NMR spectra in  $\text{CDCl}_3$  (Figure S8, S10, and S12). The integral ratio of signal 1-5 decreased in the case of copolymerization between **1** and **1-d** or **3** (Figure S10, and 12), indicating that these copolymers have high triblock nature due to the catalysts bidirectionally walking. On the other hand, the integral ratio of the signal 3 dramatically decreased, and signals 1, 2, 4, and 5 almost unchanged even after consumption of **2** (Figure S8), which suggest that the catalyst moved unidirectionally to afford block copolymer with high diblock nature.

On the other hand, if the block copolymerization completely proceeded, the signals derived from the end group of prepolymer should disappear. In fact, these signals almost disappeared in the case of phenylene monomer **3**. In the case of block copolymerization with **2** and **1-d**, however, signals of the end group of the prepolymer were observed, presumably because living polymerization nature of the homopolymerization of **2** is not so high, and because the deuterium ratio of the monomer **1d** is not 100%.

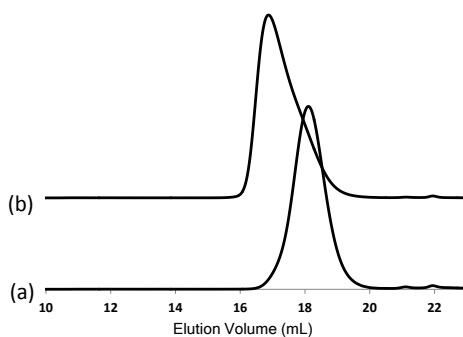

**Fig. S7** GPC profile of products obtained by the polymerization of **1** with 5.0 mol% of PEPPSI-IPr in THF ( $[\mathbf{1}]_0 = 0.08$  M) at room temperature for (a) 1 h ( $M_n = 4740$ ,  $M_w/M_n = 1.18$ ) and (b) followed by addition of **2** ( $[\mathbf{2}]_0/[\text{catalyst}]_0 = 20$ ) and stirring for 5 min ( $M_n = 8740$ ,  $M_w/M_n = 1.29$ ).

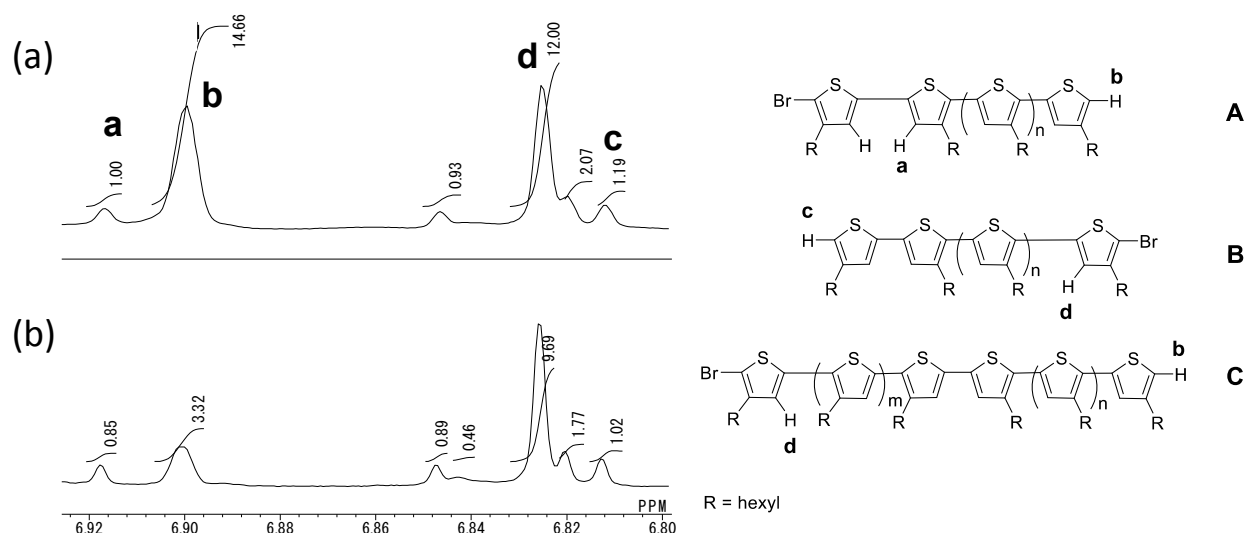

**Fig. S8**  $^1\text{H}$  NMR spectra of products obtained by polymerization of **1** with 5.0 mol% of PEPPSI-IPr in THF ( $[\mathbf{1}]_0 = 0.08$  M) at room temperature for (a) 1 h ( $M_n = 4740$ ,  $M_w/M_n = 1.18$ ) and (b) followed by addition of **2** ( $[\mathbf{2}]_0/[\text{catalyst}]_0 = 20$ ) and stirring for 5 min ( $M_n = 8740$ ,  $M_w/M_n = 1.29$ ).

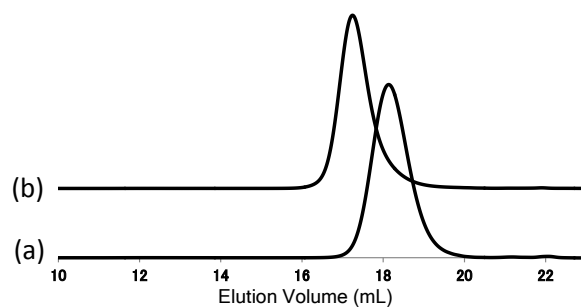

**Fig. S9** GPC profile of products obtained by the polymerization of **1** with 5.0 mol% of PEPPSI-IPr in THF ( $[\mathbf{1}]_0 = 0.08$  M) at room temperature for (a) 1 h ( $M_n = 4480$ ,  $M_w/M_n = 1.14$ ) and (b) followed by addition of **1-d** ( $[\mathbf{1-d}]_0/[\text{catalyst}]_0 = 20$ ) and stirring for 90 min ( $M_n = 8590$ ,  $M_w/M_n = 1.12$ ).

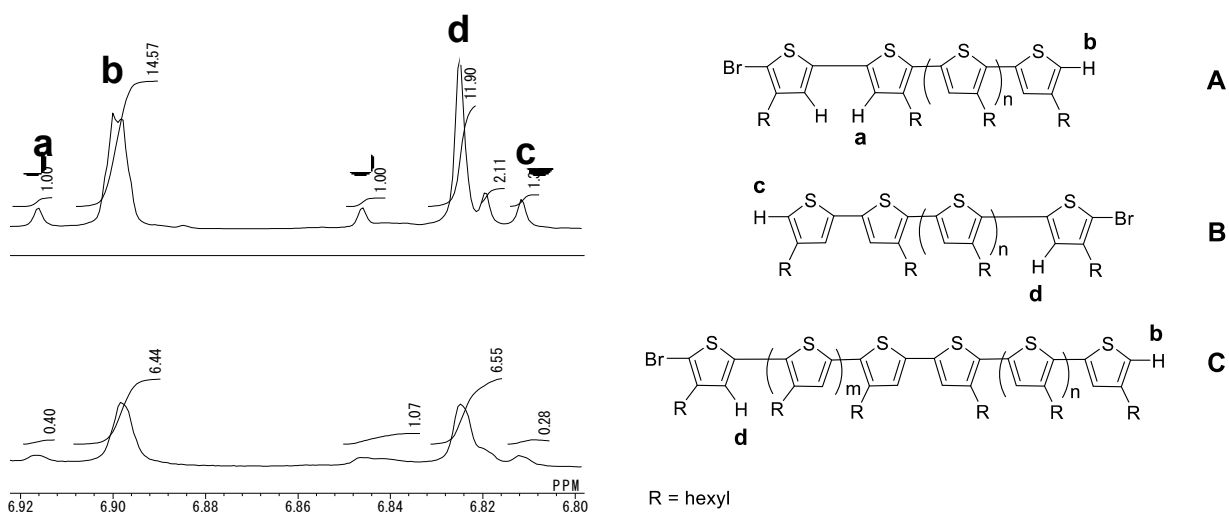

**Fig. S10**  $^1\text{H}$  NMR spectra of products obtained by polymerization of **1** with 5.0 mol% of PEPPSI-IPr in THF ( $[\mathbf{1}]_0 = 0.08$  M) at room temperature for (a) 1 h ( $M_n = 4480$ ,  $M_w/M_n = 1.14$ ) and (b) followed by addition of **1-d** ( $[\mathbf{1-d}]_0/[\text{catalyst}]_0 = 20$ ) and stirring for 90 min ( $M_n = 8590$ ,  $M_w/M_n = 1.12$ ).

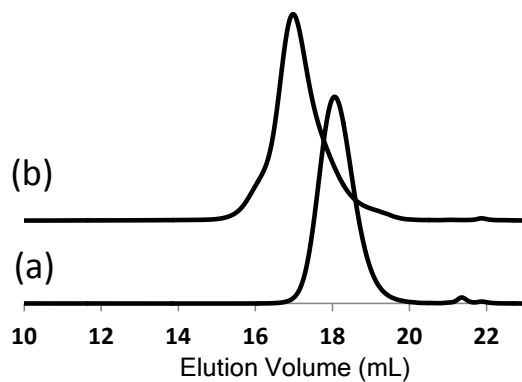

**Fig. S11** GPC profile of products obtained by the polymerization of **1** with 5.0 mol% of PEPPSI-IPr in THF ( $[\mathbf{1}]_0 = 0.08$  M) at room temperature for (a) 1 h ( $M_n = 4810$ ,  $M_w/M_n = 1.15$ ) and (b) followed by addition of **3** ( $[\mathbf{3}]_0/[\text{catalyst}]_0 = 20$ ) and stirring for 3 h ( $M_n = 9220$ ,  $M_w/M_n = 1.37$ ).

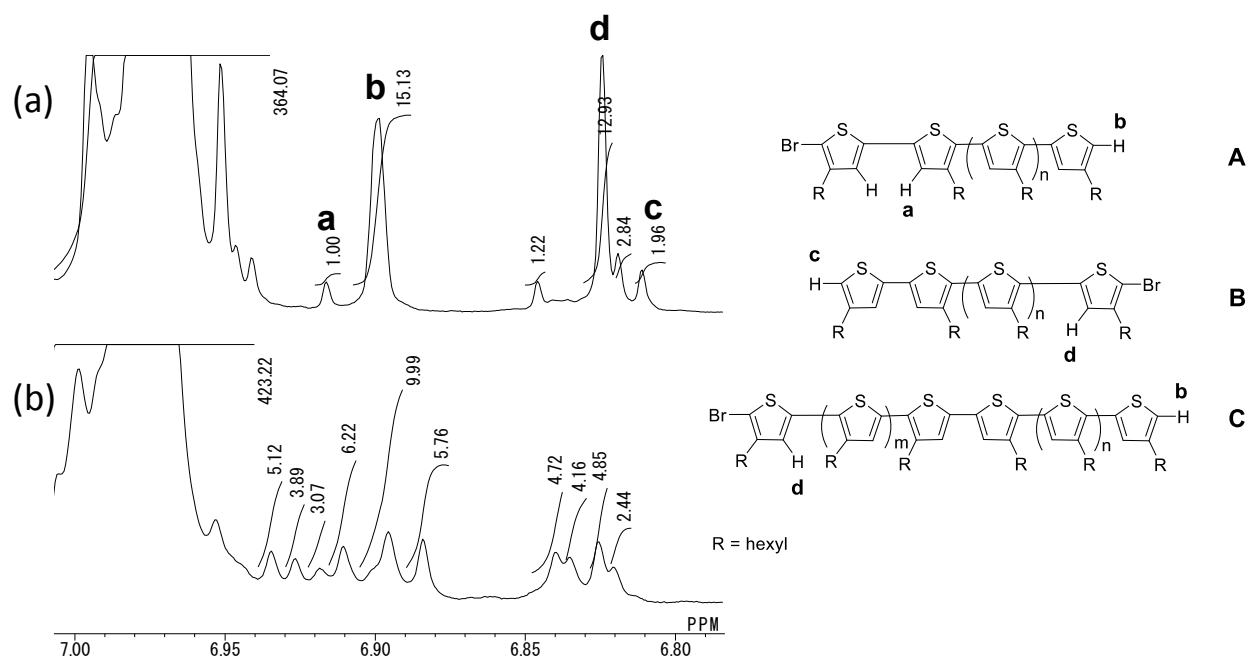

**Fig. S12**  $^1\text{H}$  NMR spectra of products obtained by polymerization of **1** with 5.0 mol% of PEPPSI-IPr in THF in THF ( $[\mathbf{1}]_0 = 0.08 \text{ M}$ ) at room temperature for (a) 1 h ( $M_n = 4810$ ,  $M_w/M_n = 1.15$ ) and (b) followed by addition of **3** ( $[\mathbf{3}]_0/[\text{catalyst}]_0 = 20$ ) and stirring for 3 h ( $M_n = 9220$ ,  $M_w/M_n = 1.37$ ).



## 6. Supporting References

- S1. (Complete reference of ref. 5 in main text) Gaussian 09, Revision D.1, Frisch, M. J.; Trucks, G. W.; Schlegel, H. B.; Scuseria, G. E.; Robb, M. A.; Cheeseman, J. R.; Scalmani, G.; Barone, V.; Mennucci, B.; Petersson, G. A.; Nakatsuji, H.; Caricato, M.; Li, X.; Hratchian, H. P.; Izmaylov, A. F.; Bloino, J.; Zheng, G.; Sonnenberg, J. L.; Hada, M.; Ehara, M.; Toyota, K.; Fukuda, R.; Hasegawa, J.; Ishida, M.; Nakajima, T.; Honda, Y.; Kitao, O.; Nakai, H.; Vreven, T.; Montgomery Jr., J. A.; Peralta, J. E.; Ogliaro, F.; Bearpark, M.; Heyd, J. J.; Brothers, E.; Kudin, K. N.; Staroverov, V. N.; Kobayashi, R.; Normand, J.; Raghavachari, K.; Rendell, A.; Burant, J. C.; Iyengar, S. S.; Tomasi, J.; Cossi, M.; Rega, N.; Millam, J. M.; Klene, M.; Knox, J. E.; Cross, J. B.; Bakken, V.; Adamo, C.; Jaramillo, J.; Gomperts, R.; Stratmann, R. E.; Yazyev, O.; Austin, A. J.; Cammi, R.; Pomelli, C.; Ochterski, J. W.; Martin, R. L.; Morokuma, K.; Zakrzewski, V. G.; Voth, G. A.; Salvador, P.; Dannenberg, J. J.; Dapprich, S.; Daniels, A. D.; Farkas, Ö.; Foresman, J. B.; Ortiz, J. V.; Cioslowski, J.; Fox, D. J. Gaussian, Inc., Wallingford CT (2010).
- S2. Becke, A. D. *Phys. Rev. A* 1988, **38**, 3098–3100.
- S3. Lee, C.; Yang, W.; Parr, R. G. *Phys. Rev. B* 1988, **37**, 785–89.
- S4. Miehlich, B.; Savin, A.; Stoll, H.; Preuss, H. *Chem. Phys. Lett.* 1989, **157**, 200–206.
- S5. Ohno, K.; Maeda, S. *Chem. Phys. Lett.* 2004, **384**, 277–282.
- S6. Maeda, S.; Ohno, K. *J. Phys. Chem. A* 2005, **109**, 5742–5753.
- S7. Yang, X.; Maeda, S.; Ohno, K. *J. Phys. Chem. A* 2005, **109**, 7319–7328.
- S8. Ohno, K.; Maeda, S. *J. Phys. Chem. A* 2006, **110**, 8933–8941.
- S9. Yang, X.; Maeda, S.; Ohno, K. *Chem. Phys. Lett.* 2006, **418**, 208–216.
- S10. Maeda, S.; Ohno, K. *J. Phys. Chem. A* 2007, **111**, 4527–4534.
- S11. Yang, X.; Maeda, S.; Ohno, K. *J. Phys. Chem. A* 2007, **111**, 5099–5110.
- S12. Watanabe, Y.; Maeda, S.; Ohno, K. *Chem. Phys. Lett.* 2007, **447**, 21–26.

- S13. NBO 5.9, Glendening, E. D.; Badenhop, J. K.; Reed, A. E.; Carpenter, J. E.; Bohmann, J. A.; Marales, C. M.; Weinhold, F. Theoretical Chemistry Institute, University of Wisconsin, Madison, WI (2009).
- S14. Reed, A. E.; Weinhold, F. *J. Chem. Phys.* 1983, **78**, 4066–4073.
- S15. Reed, A. E.; Weinstock, R. B.; Weinhold, F. *J. Chem. Phys.* 1985, **83**, 735–746.
- S16. Fukui, K. *Acc. Chem. Res.* 1981, **14**, 363–368.
- S17. Ishida, K.; Morokuma, K.; Komornicki, A. *J. Chem. Phys.* 1977, **66**, 2153–2156.
- S18. Gonzalez, C.; Schlegel, H. B. *J. Chem. Phys.* 1989, **90**, 2154–2161.
- S19. Miyakoshi, R.; Shimono, K.; Yokoyama, A.; Yokozawa, T. *J. Am. Chem. Soc.* **2006**, *128*, 16012-16013.
- S20. Kohn, P.; Huettner, S.; Komber, H.; Senkovskyy, V.; Tkachov, R.; Kiriy, A.; Friend, R. H.; Steiner, U.; Huck, W. T. S.; Sommer, J.-U.; Sommer, M. *J. Am. Chem. Soc.* 2012, **134**, 4790-4805.

## 7. Appendix.

### 7-1. Optimized geometries.

The geometries were given by tube type model (atom color: yellow = sulfur, silver = carbon, red = bromide, white = hydrogen, light yellow = magnesium, dark yellow = phosphine, light green = chloride, blue = nitrogen, light blue = nickel, dark blue = palladium).

a

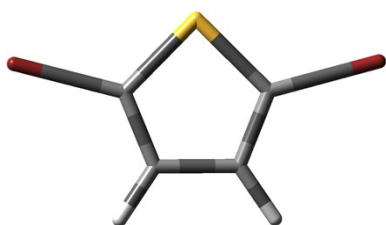

b

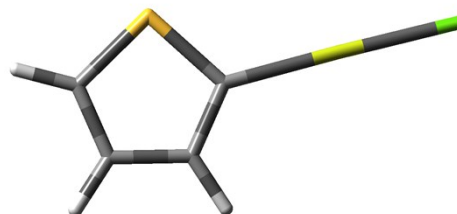

c

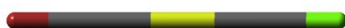

d

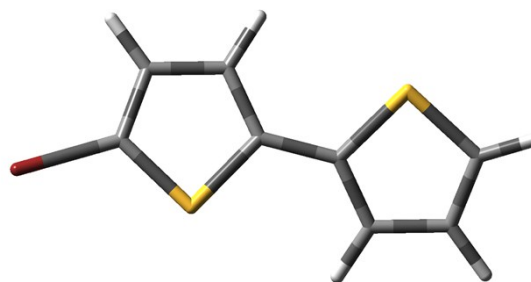

**Fig. S13** Optimized geometries of (a) 2,5-dibromothiophene, (b) 2-chloromagnesium thiophene, (c) MgBrCl and (d) 2-bromobithiophene.

a

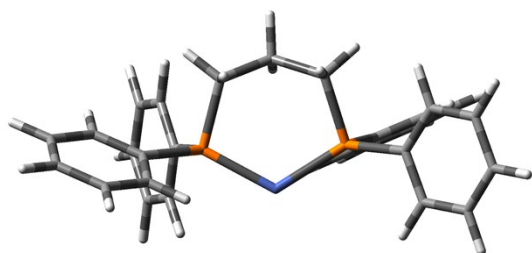

b

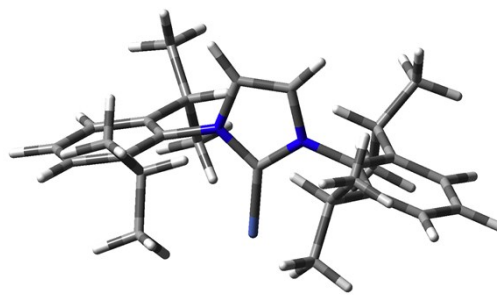

c

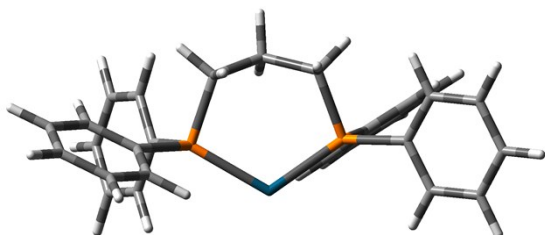

d

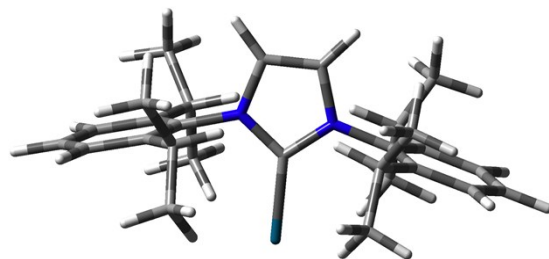

**Fig. S14** Optimized geometries of (a) Ni(0)dppp, (b) Ni(0)NHC, (c) Pd(0)dppp and (d) Pd(0)NHC.

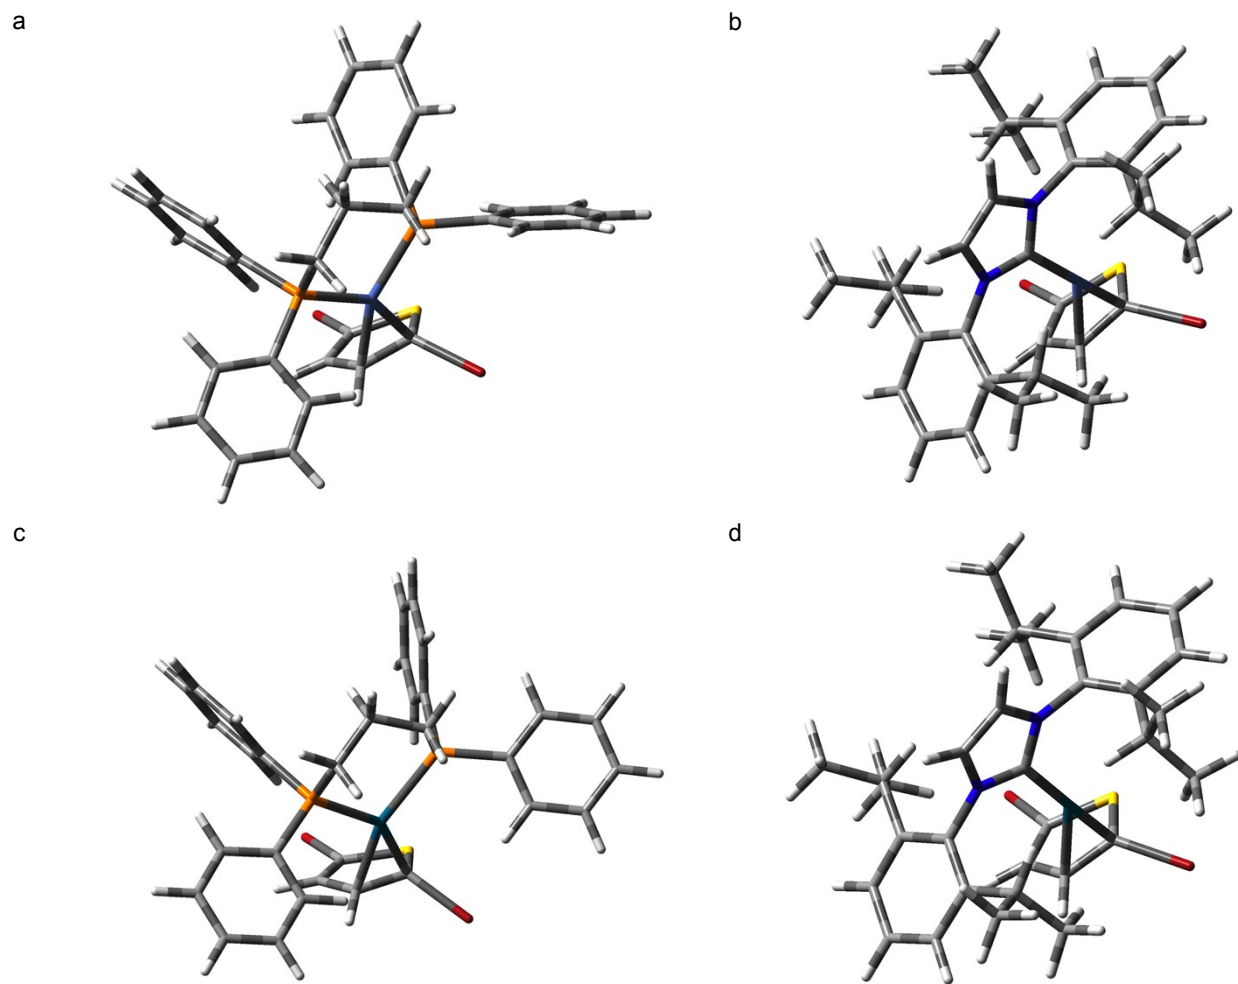

**Fig. S15** Optimized geometries of **CP1s** with (a) Ni(0)dppp, (b) Ni(0)NHC, (c) Pd(0)dppp and (d) Pd(0)NHC.

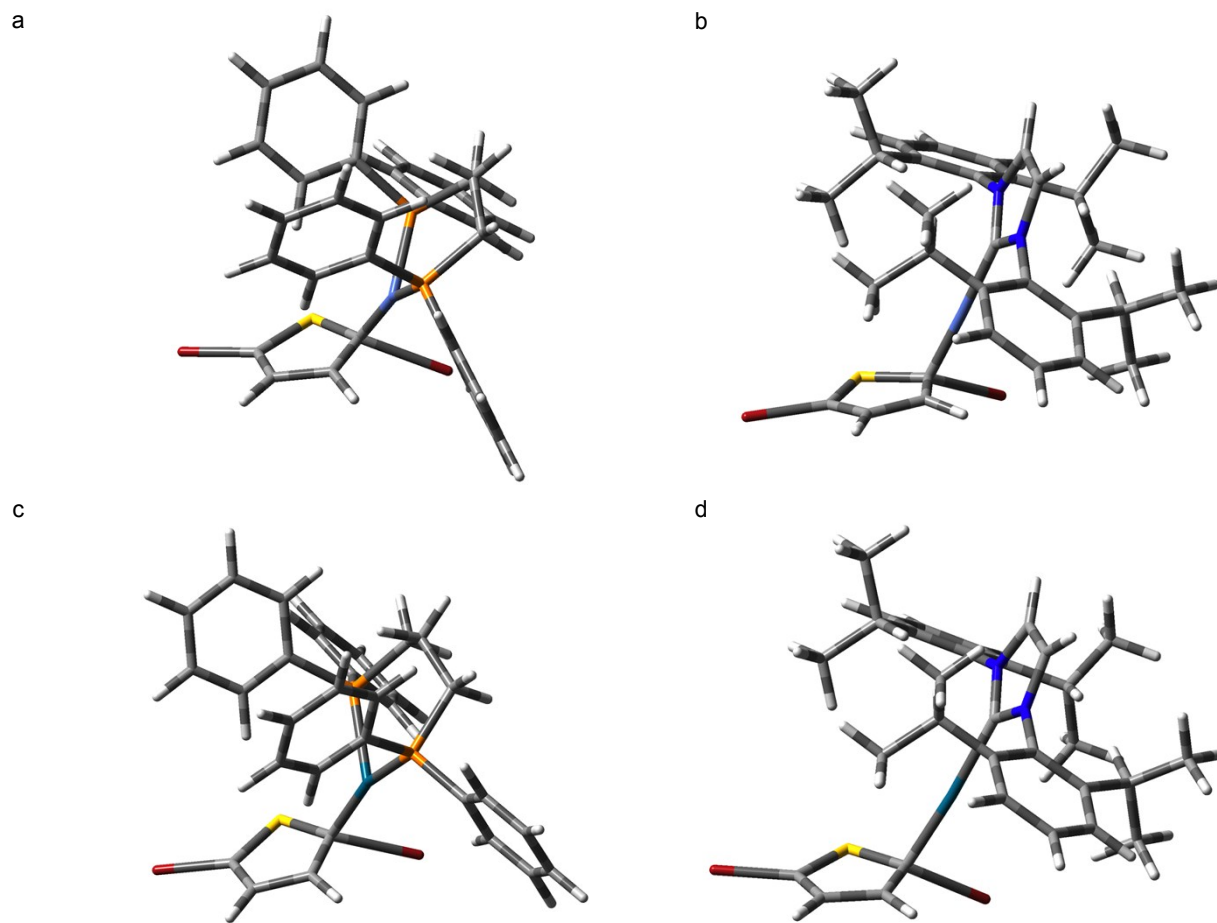

**Fig. S16** Optimized geometries of TS1s with (a) Ni(0)dppp, (b) Ni(0)NHC, (c) Pd(0)dppp and (d) Pd(0)NHC.

a

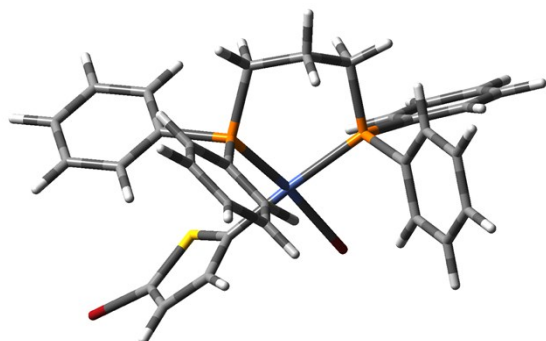

b

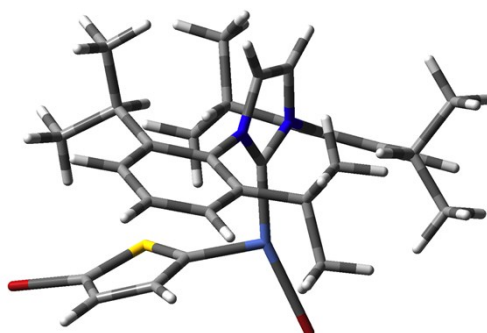

c

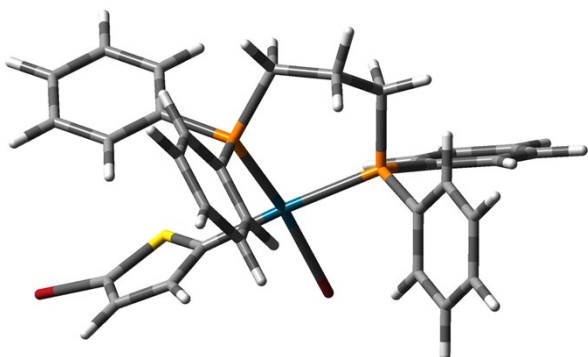

d

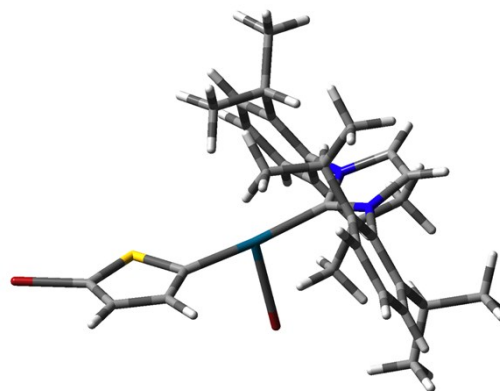

**Fig. S17** Optimized geometries of **CP2s** with (a) Ni(0)dppp, (b) Ni(0)NHC, (c) Pd(0)dppp and (d) Pd(0)NHC.

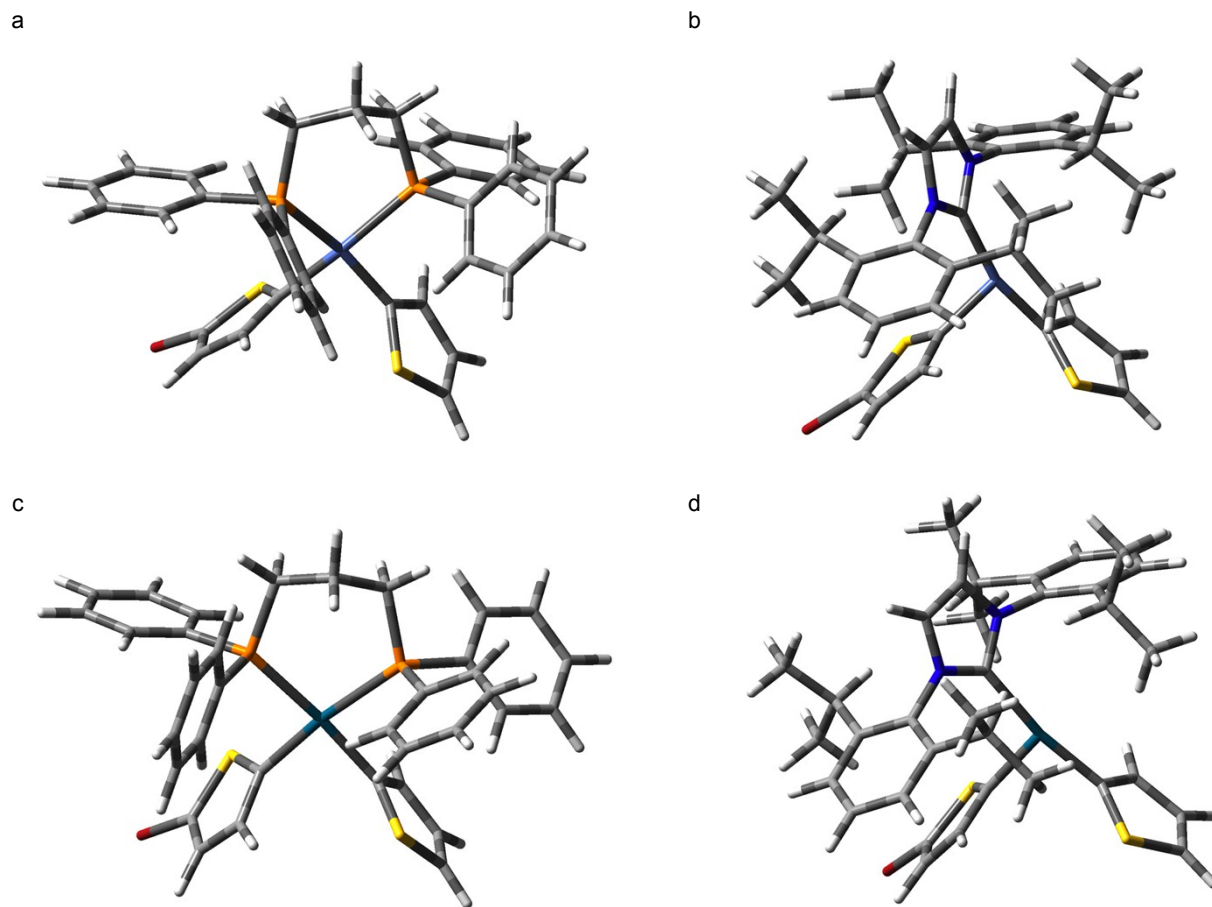

**Fig. S18** Optimized geometries of **CP3s** with (a) Ni(0)dppp, (b) Ni(0)NHC, (c) Pd(0)dppp and (d) Pd(0)NHC.



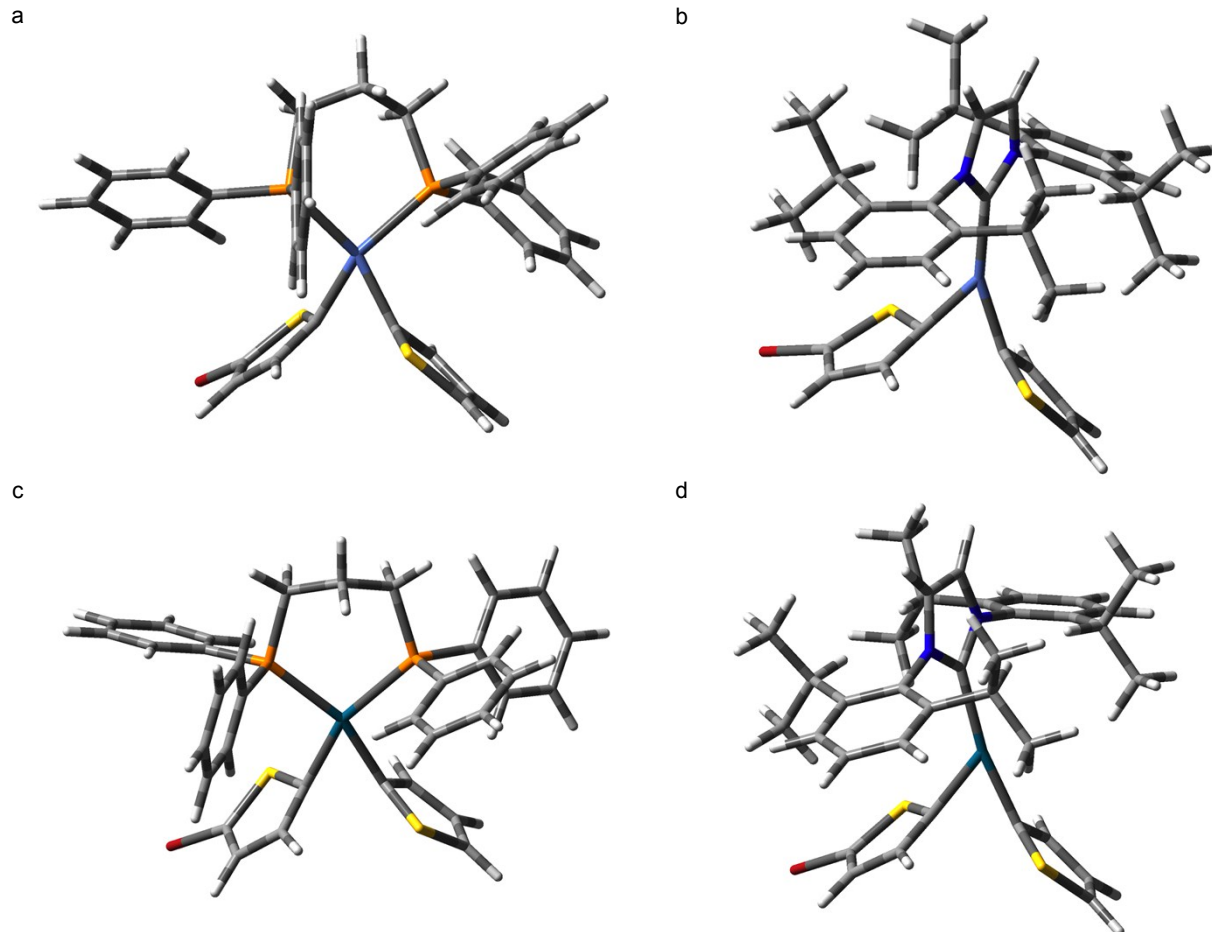

**Fig. S19** Optimized geometries of TS2s with (a) Ni(0)dppp, (b) Ni(0)NHC, (c) Pd(0)dppp and (d) Pd(0)NHC.

a

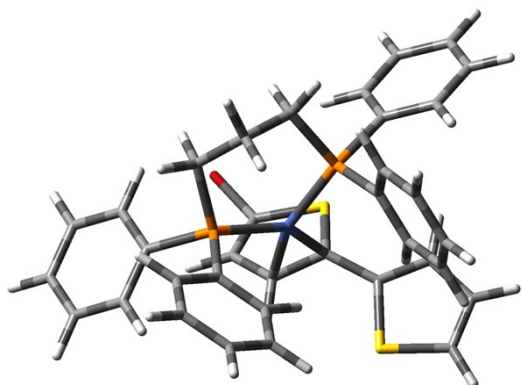

b

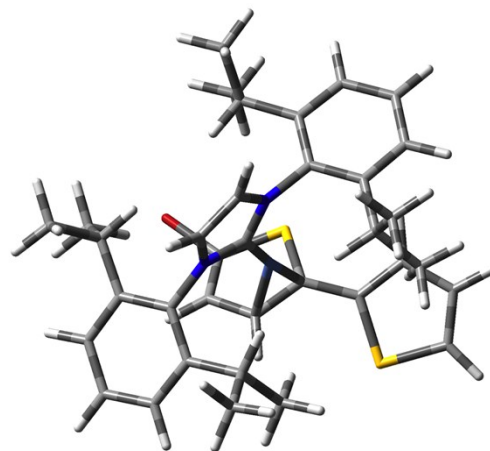

c

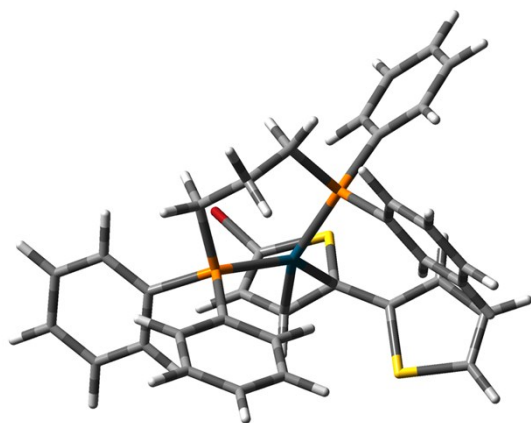

d

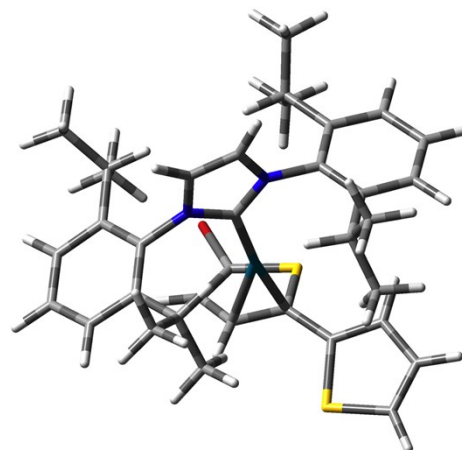

**Fig. S20** Optimized geometries of CP4s with (a) Ni(0)dppp, (b) Ni(0)NHC, (c) Pd(0)dppp and (d) Pd(0)NHC.

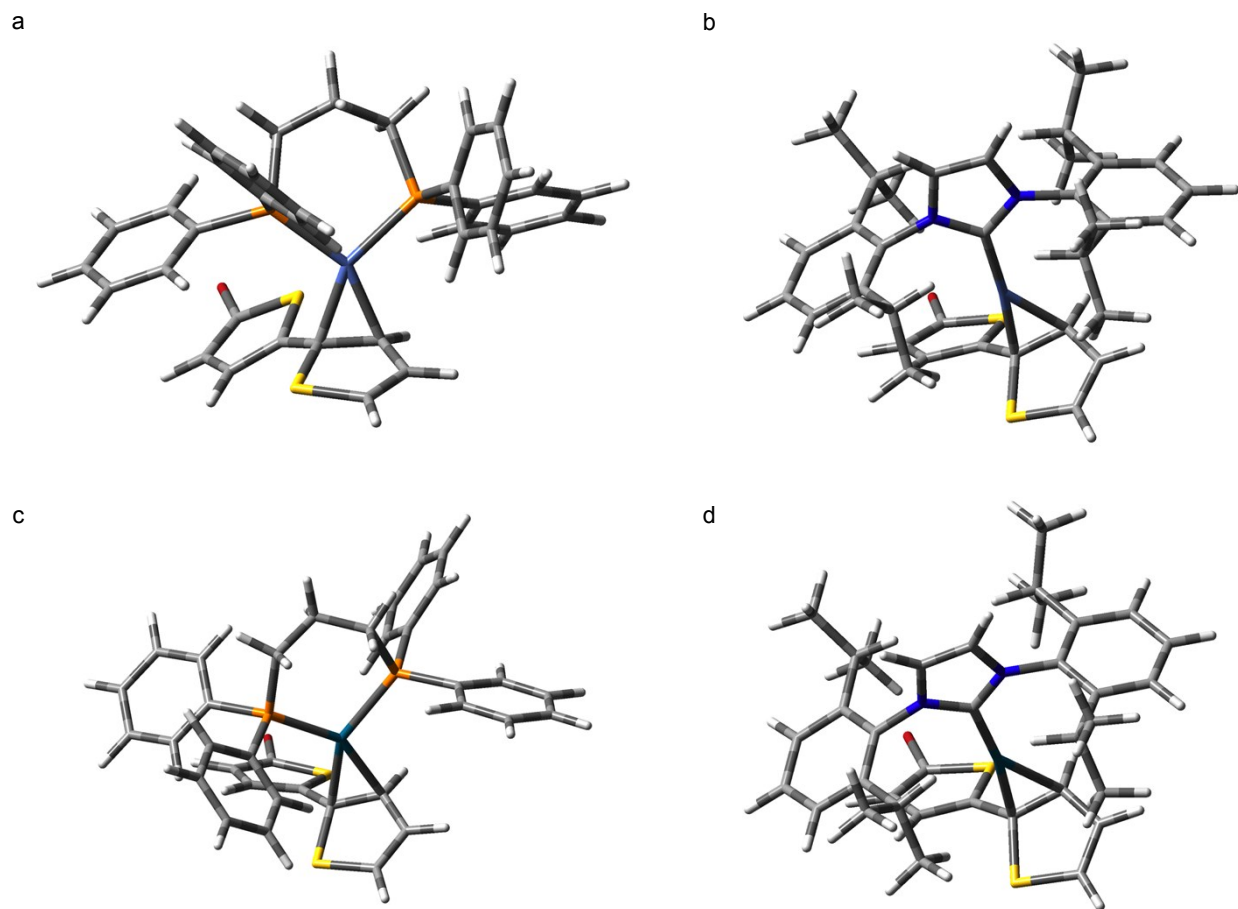

**Fig. S21** Optimized geometries of **CP5s** with (a) Ni(0)dppp, (b) Ni(0)NHC, (c) Pd(0)dppp and (d) Pd(0)NHC.

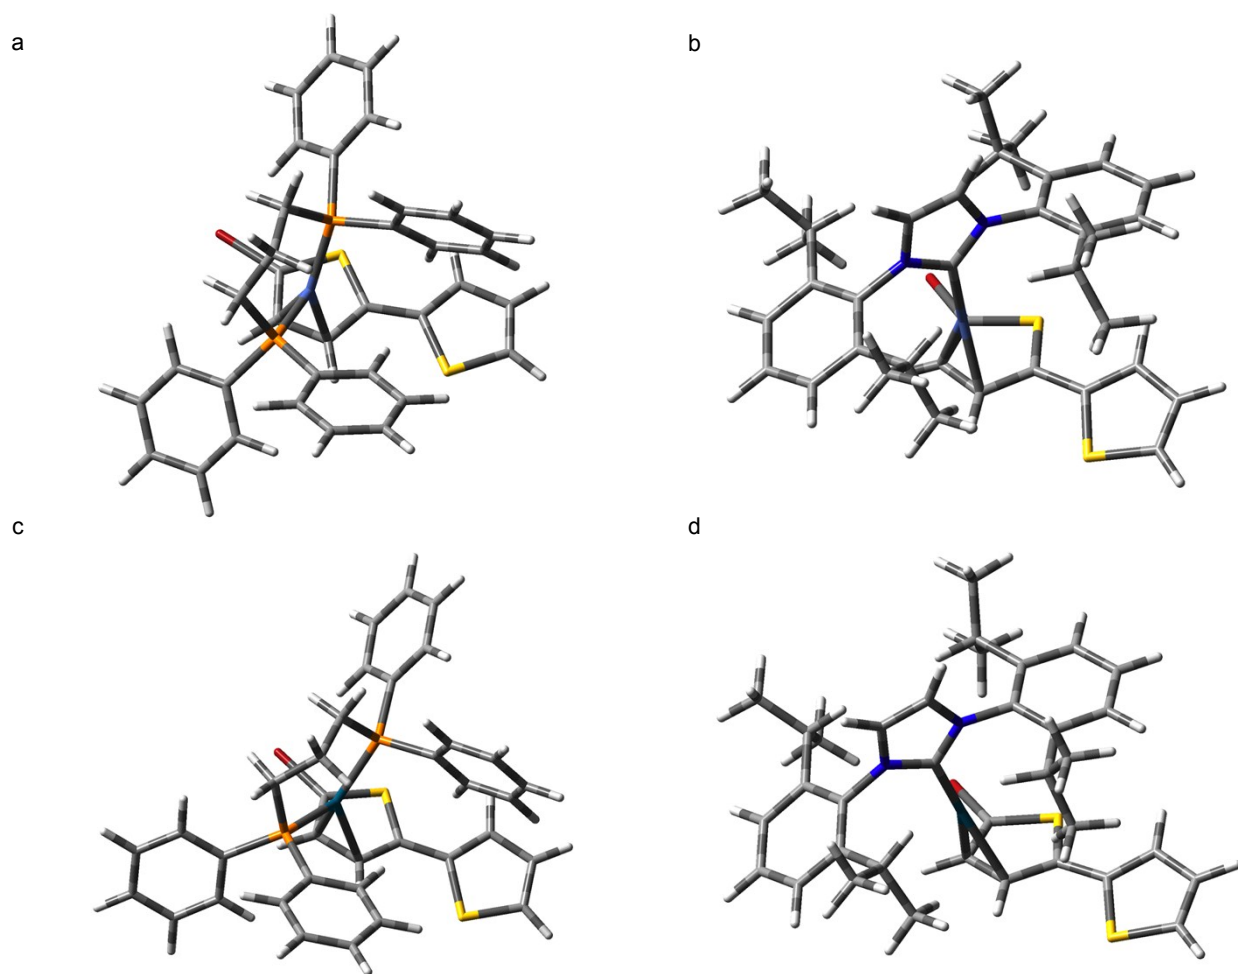

**Fig. S22** Optimized geometries of TS3s with (a) Ni(0)dppp, (b) Ni(0)NHC, (c) Pd(0)dppp and (d) Pd(0)NHC.

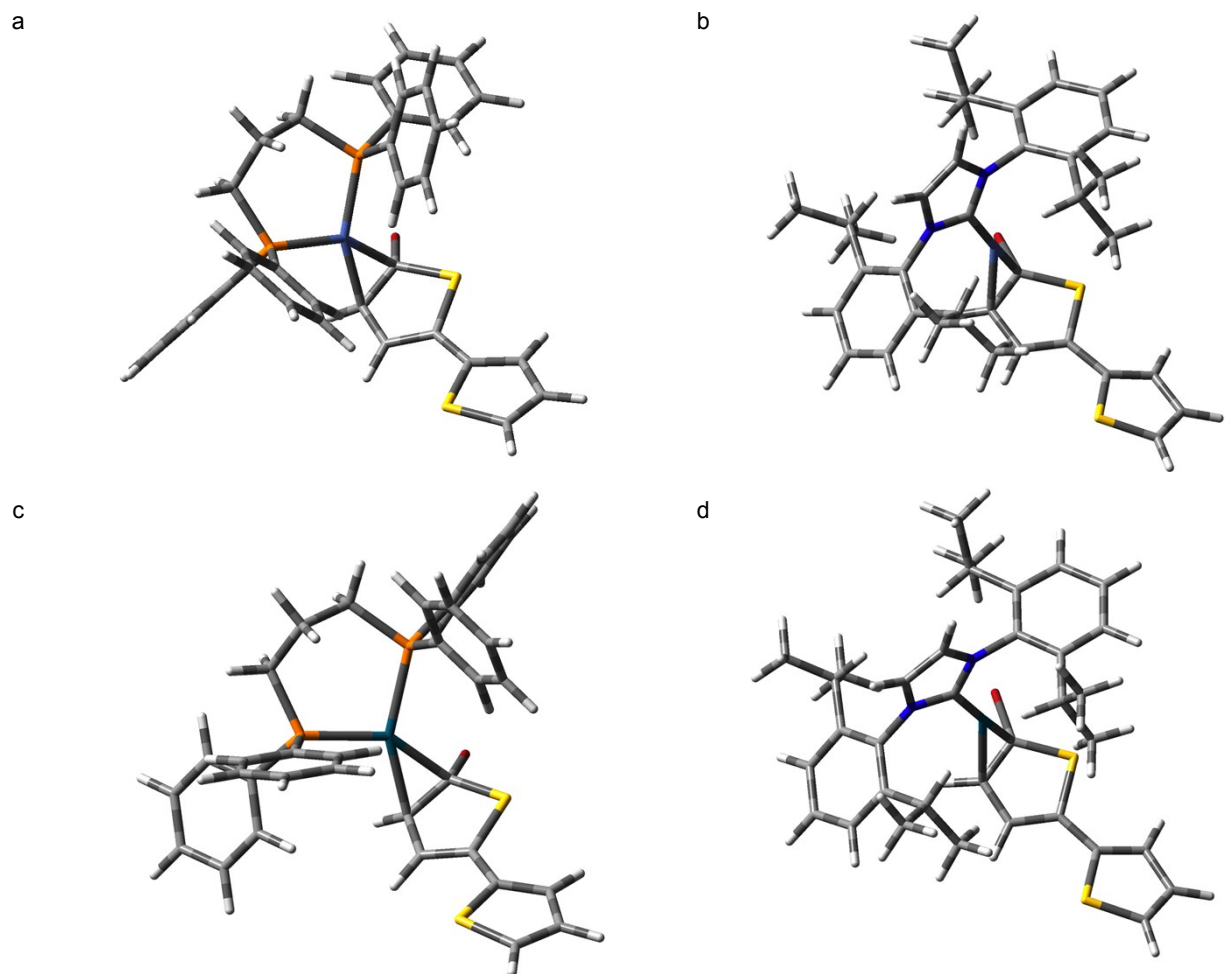

**Fig. S23** Optimized geometries of CP6s with (a) Ni(0)dppp, (b) Ni(0)NHC, (c) Pd(0)dppp and (d) Pd(0)NHC.

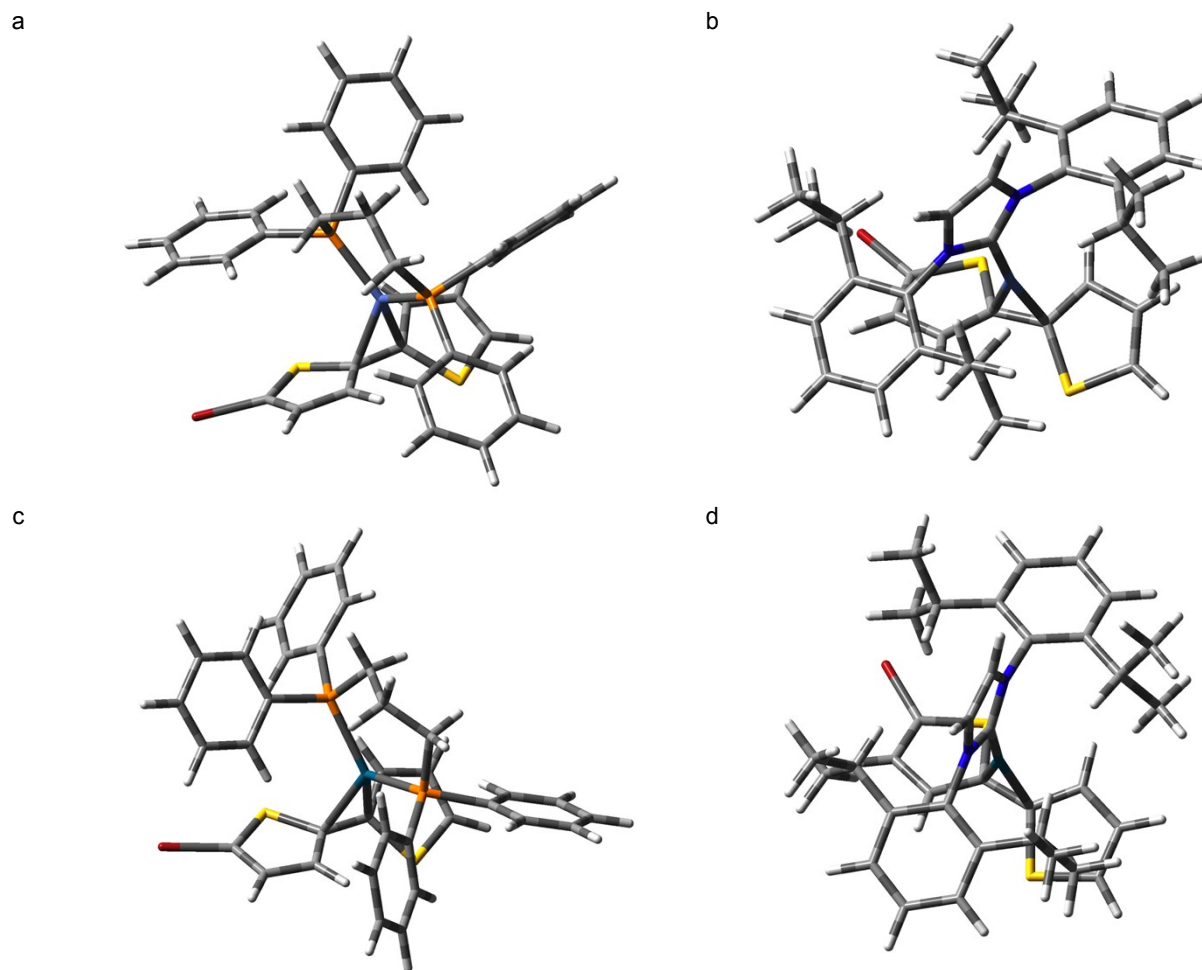

**Fig. S24** Optimized geometries of TS4s with (a) Ni(0)dppp, (b) Ni(0)NHC, (c) Pd(0)dppp and (d) Pd(0)NHC.

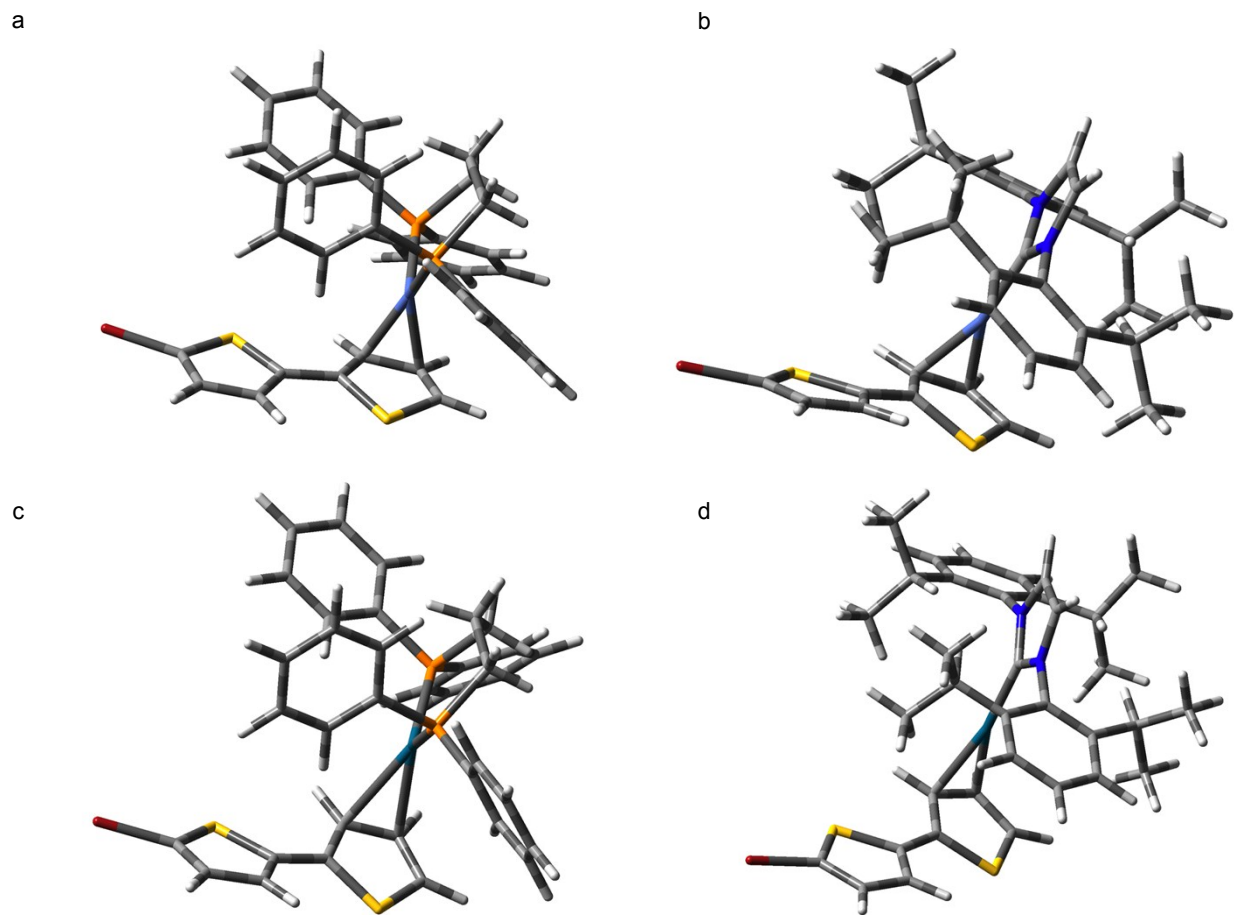

**Fig. S25** Optimized geometries of TS5s with (a) Ni(0)dppp, (b) Ni(0)NHC, (c) Pd(0)dppp and (d) Pd(0)NHC.

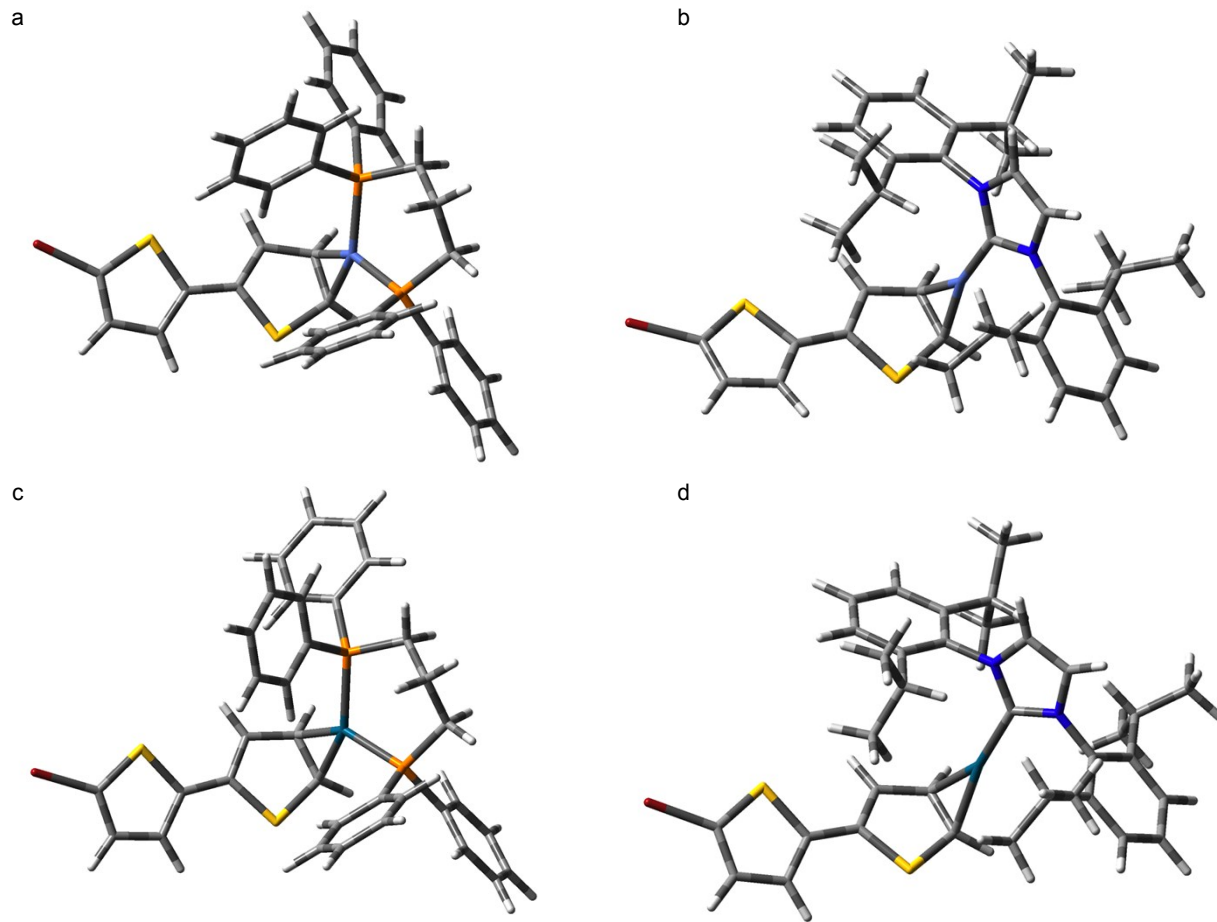

**Fig. S26** Optimized geometries of CP7s with (a) Ni(0)dppp, (b) Ni(0)NHC, (c) Pd(0)dppp and (d) Pd(0)NHC.



a

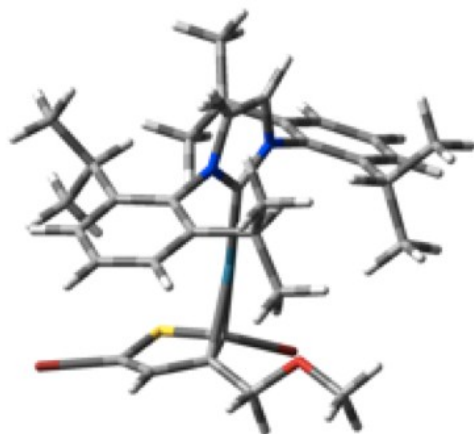

b

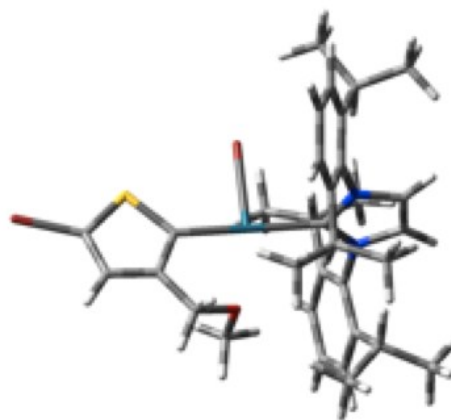

**Fig. S27** Optimized geometries of (a) **CP8** and (b) **CP9** with Pd(0)NHC.

## 7-2. Cartesian Coordinates (in Å) and Energies

### SM

#### Dibromothiophene

Energy (RB3LYP) = -578.100651074622 A.U.

Free Energy = -578.087551752611 A.U.

|    |             |             |             |
|----|-------------|-------------|-------------|
| C  | 0.71604200  | 1.57153400  | 0.00003900  |
| S  | 0.00001500  | -0.92503200 | 0.00015800  |
| C  | -0.71606200 | 1.57151600  | 0.00008300  |
| H  | 1.32221900  | 2.46931500  | -0.00002700 |
| C  | -1.22960200 | 0.30795100  | 0.00015400  |
| H  | -1.32226100 | 2.46928300  | 0.00001500  |
| Br | -3.10220300 | -0.18131500 | -0.00006900 |
| C  | 1.22960800  | 0.30797900  | 0.00006100  |
| Br | 3.10220000  | -0.18131300 | -0.00006100 |

#### 2-magnecioclorothiophene

Energy (RB3LYP) = -1212.764690363633 A.U.

Free Energy = -1212.741298320730 A.U.

|    |             |             |             |
|----|-------------|-------------|-------------|
| C  | 0.55966600  | 0.21982300  | -0.00001700 |
| C  | 1.35795100  | 1.35095400  | -0.00000800 |
| C  | 2.76299100  | 1.09693900  | 0.00000800  |
| C  | 3.05620300  | -0.23983600 | 0.00001500  |
| S  | 1.60573800  | -1.18676700 | -0.00000400 |
| H  | 0.95470700  | 2.36065500  | -0.00001400 |
| H  | 3.51911400  | 1.87541700  | 0.00001200  |
| H  | 4.02962100  | -0.71269300 | 0.00002100  |
| Mg | -1.48683300 | 0.08654000  | -0.00000400 |
| Cl | -3.69259600 | -0.00828600 | 0.00000600  |

#### Br-Th-Th

Energy (RB3LYP) = -1117.357193399719 A.U.

Free Energy = -1117.291270001274 A.U.

|   |             |             |             |
|---|-------------|-------------|-------------|
| C | -0.73634800 | 0.27303200  | 0.10697500  |
| C | -0.18951500 | 1.51762700  | 0.29913700  |
| C | 1.22875200  | 1.53251700  | 0.26592300  |
| S | 0.51587400  | -0.92360700 | -0.13750700 |
| H | -0.79595100 | 2.40226100  | 0.48244400  |
| H | 1.84265800  | 2.41706500  | 0.40657200  |
| C | -2.12816200 | -0.11644700 | 0.07662800  |
| C | -2.68248000 | -1.35690200 | 0.27750800  |
| S | -3.36890500 | 1.06289900  | -0.26134400 |
| C | -4.09658800 | -1.36227400 | 0.17209400  |

|    |             |             |             |
|----|-------------|-------------|-------------|
| H  | -2.08725000 | -2.23556500 | 0.51800800  |
| C  | -4.60992600 | -0.12878600 | -0.10583600 |
| H  | -4.71019400 | -2.24861000 | 0.30748300  |
| C  | 1.73818800  | 0.28810100  | 0.04801700  |
| Br | 3.59726100  | -0.18860000 | -0.05555400 |
| H  | -5.64842400 | 0.15596600  | -0.23117300 |

#### BrMgCl

Energy (RB3LYP) = -673.597620404358 A.U.

Free Energy = -673.622017823457 A.U.

|    |            |            |             |
|----|------------|------------|-------------|
| Cl | 0.00000000 | 0.00000000 | -2.90701500 |
| Mg | 0.00000000 | 0.00000000 | -0.71269200 |
| Br | 0.00000000 | 0.00000000 | 1.65633000  |

## CPs and TSs with Ni(0)dppp

### Ni(0)dppp

Energy (RB3LYP) = -1896.527249213089 A.U.

Free Energy = -1896.137431604210 A.U.

|    |             |             |             |
|----|-------------|-------------|-------------|
| Ni | 0.01495000  | -0.63595700 | -1.01217300 |
| P  | -1.81087300 | -0.37294600 | 0.01115800  |
| P  | 1.82666100  | -0.29405200 | 0.02722900  |
| C  | 1.32826900  | -0.45542400 | 1.83988000  |
| H  | 2.12702000  | -0.03675600 | 2.46579300  |
| H  | 1.26865400  | -1.52868200 | 2.06204700  |
| C  | -1.30037600 | -0.51334900 | 1.81761200  |
| H  | -1.18285400 | -1.58954500 | 1.99638900  |
| H  | -2.12925300 | -0.19207900 | 2.46195800  |
| C  | -0.00474700 | 0.22656200  | 2.21970900  |
| H  | -0.01371000 | 0.31524200  | 3.31510300  |
| H  | -0.01889700 | 1.25596200  | 1.83930300  |
| C  | -2.56333400 | 1.31736000  | -0.11804200 |
| C  | -2.77361800 | 1.82338300  | -1.41314100 |
| C  | -2.90929400 | 2.12842600  | 0.97431700  |
| C  | -3.33163000 | 3.08584100  | -1.61096000 |
| H  | -2.48895600 | 1.21797000  | -2.27063900 |
| C  | -3.45664900 | 3.39960600  | 0.77826400  |
| H  | -2.75271100 | 1.77895300  | 1.99023100  |
| C  | -3.67351300 | 3.88018400  | -0.51335400 |
| H  | -3.49075300 | 3.45350300  | -2.62142800 |
| H  | -3.71356900 | 4.01287500  | 1.63837900  |
| H  | -4.09971100 | 4.86842600  | -0.66459600 |
| C  | -3.30237100 | -1.48291700 | 0.02456200  |
| C  | -4.54414100 | -1.11564600 | 0.56597000  |
| C  | -3.15811700 | -2.76939300 | -0.51702500 |
| C  | -5.61091900 | -2.01589500 | 0.57129100  |
| H  | -4.68426200 | -0.11858600 | 0.97480900  |
| C  | -4.22142600 | -3.67411200 | -0.50410500 |
| H  | -2.20413600 | -3.05393900 | -0.95568300 |
| C  | -5.45117000 | -3.29789100 | 0.03947000  |
| H  | -6.56864500 | -1.71567600 | 0.98933300  |
| H  | -4.09202900 | -4.66737500 | -0.92652000 |
| H  | -6.28341600 | -3.99705200 | 0.04300200  |
| C  | 2.52927000  | 1.42601000  | 0.00752200  |
| C  | 1.71776900  | 2.46460800  | -0.47720600 |
| C  | 3.81480200  | 1.74055700  | 0.47599800  |
| C  | 2.17296800  | 3.78475600  | -0.48009400 |
| H  | 0.72604500  | 2.22965200  | -0.85572000 |
| C  | 4.27319600  | 3.05890200  | 0.46498200  |
| H  | 4.46712500  | 0.95215200  | 0.84091200  |
| C  | 3.45270400  | 4.08479200  | -0.01018000 |
| H  | 1.52952000  | 4.57598600  | -0.85636800 |
| H  | 5.27368700  | 3.28470300  | 0.82577400  |
| H  | 3.81189500  | 5.11068900  | -0.01923600 |
| C  | 3.34810400  | -1.35499700 | -0.05723900 |
| C  | 4.06395300  | -1.82131300 | 1.05731600  |

|   |            |             |             |
|---|------------|-------------|-------------|
| C | 3.78673900 | -1.73671200 | -1.33650300 |
| C | 5.18659400 | -2.63796100 | 0.89580600  |
| H | 3.75188300 | -1.55303600 | 2.06209000  |
| C | 4.91463400 | -2.54010800 | -1.50044000 |
| H | 3.22781700 | -1.40376500 | -2.20836000 |
| C | 5.61733700 | -2.99601200 | -0.38222000 |
| H | 5.72476700 | -2.99239400 | 1.77147100  |
| H | 5.23847500 | -2.81976100 | -2.49969400 |
| H | 6.49042600 | -3.63122000 | -0.50644100 |

### CP1

Energy (RB3LYP) = -2474.678360319427 A.U.

Free Energy = -2474.253168841656 A.U.

|    |             |             |             |
|----|-------------|-------------|-------------|
| Ni | -0.03786000 | -0.03859600 | -0.64537800 |
| P  | 1.42328100  | -1.54006300 | 0.16665700  |
| P  | -1.92788800 | -1.22845400 | -0.44961200 |
| C  | -1.64735500 | -3.07186700 | -0.59374900 |
| H  | -2.58801400 | -3.60589000 | -0.41477200 |
| H  | -1.40247500 | -3.24287900 | -1.65005200 |
| C  | 0.90739100  | -3.31016300 | -0.15648200 |
| H  | 0.99197400  | -3.48935500 | -1.23565100 |
| H  | 1.61650800  | -3.98454500 | 0.33817500  |
| C  | -0.52792700 | -3.64388400 | 0.29797800  |
| H  | -0.62760500 | -4.73740200 | 0.29204500  |
| H  | -0.67388100 | -3.33639400 | 1.34131400  |
| C  | 1.55277100  | -1.52594500 | 2.01154700  |
| C  | 0.74787600  | -0.64753200 | 2.74984400  |
| C  | 2.43057600  | -2.38130600 | 2.69917500  |
| C  | 0.80922600  | -0.62921000 | 4.14591000  |
| H  | 0.07556100  | 0.02683300  | 2.22826600  |
| C  | 2.49123500  | -2.36416500 | 4.09167600  |
| H  | 3.08129200  | -3.05165800 | 2.14348100  |
| C  | 1.67848800  | -1.48808700 | 4.81796400  |
| H  | 0.17892200  | 0.05847600  | 4.70300900  |
| H  | 3.17592700  | -3.02956700 | 4.61117400  |
| H  | 1.72926600  | -1.47328900 | 5.90353100  |
| C  | 3.19788600  | -1.52616700 | -0.33868100 |
| C  | 3.74141500  | -2.44023600 | -1.25285700 |
| C  | 4.02342700  | -0.50391900 | 0.16146300  |
| C  | 5.07732000  | -2.34092600 | -1.64994100 |
| H  | 3.13204200  | -3.23768800 | -1.66622900 |
| C  | 5.35596700  | -0.40749000 | -0.23412100 |
| H  | 3.62197700  | 0.21906100  | 0.86636000  |
| C  | 5.88818600  | -1.32651600 | -1.14205300 |
| H  | 5.48117100  | -3.06009500 | -2.35788000 |
| H  | 5.97829800  | 0.38925600  | 0.16438800  |
| H  | 6.92659200  | -1.24942600 | -1.45278400 |
| C  | -2.86153000 | -1.01577700 | 1.12891600  |
| C  | -2.86534200 | 0.26701300  | 1.70477500  |
| C  | -3.55111200 | -2.04709500 | 1.78583100  |
| C  | -3.55149700 | 0.51382900  | 2.89429400  |

|    |             |             |             |
|----|-------------|-------------|-------------|
| H  | -2.32227900 | 1.07333000  | 1.21921200  |
| C  | -4.22970000 | -1.80176300 | 2.98194100  |
| H  | -3.56635900 | -3.05085600 | 1.37248500  |
| C  | -4.23403900 | -0.52123400 | 3.53716600  |
| H  | -3.54492100 | 1.51303700  | 3.32136500  |
| H  | -4.75498500 | -2.61346900 | 3.47840800  |
| H  | -4.76266700 | -0.33222200 | 4.46759800  |
| C  | -3.20012200 | -0.99106200 | -1.77061300 |
| C  | -4.58220500 | -1.04523400 | -1.53935600 |
| C  | -2.74030100 | -0.76454100 | -3.07895400 |
| C  | -5.48290500 | -0.88200100 | -2.59440900 |
| H  | -4.95929700 | -1.20879300 | -0.53427800 |
| C  | -3.64094800 | -0.61399800 | -4.13378600 |
| H  | -1.67134300 | -0.69731700 | -3.26835800 |
| C  | -5.01569900 | -0.66993900 | -3.89262800 |
| H  | -6.55159000 | -0.92074200 | -2.39965400 |
| H  | -3.26889600 | -0.44143400 | -5.14019000 |
| H  | -5.71873400 | -0.54246700 | -4.71141400 |
| C  | -0.02110500 | 3.32978700  | 0.24637200  |
| C  | -1.00431500 | 2.79421800  | -0.50993700 |
| C  | -0.52366900 | 1.76201400  | -1.42235200 |
| C  | 0.88648000  | 1.52116900  | -1.25216100 |
| S  | 1.58437100  | 2.66814300  | -0.04600600 |
| H  | -2.03816400 | 3.12016200  | -0.46670000 |
| H  | -1.01815300 | 1.61795800  | -2.37938100 |
| Br | -0.26190000 | 4.66566100  | 1.64681300  |
| Br | 2.03642200  | 1.21541600  | -2.90050100 |

### CP2

Energy (RB3LYP) = -2474.718558580249 A.U.

Free Energy = -2474.289656515730 A.U.

|    |             |             |             |
|----|-------------|-------------|-------------|
| Ni | -0.29005100 | -0.43232000 | -0.07045900 |
| P  | 0.42788900  | 1.36401400  | 1.06029400  |
| P  | -2.52390800 | -0.23150000 | 0.59610000  |
| C  | -2.83294700 | 0.74358700  | 2.15714300  |
| H  | -3.91296700 | 0.87965400  | 2.28162200  |
| H  | -2.52147000 | 0.08097800  | 2.97483300  |
| C  | -0.58744700 | 1.94165400  | 2.52463400  |
| H  | -0.42667300 | 1.23590000  | 3.34723900  |
| H  | -0.16380400 | 2.90066400  | 2.84365600  |
| C  | -2.09427600 | 2.08681200  | 2.26873100  |
| H  | -2.52286700 | 2.64202600  | 3.11352200  |
| H  | -2.27130200 | 2.70536200  | 1.38031000  |
| C  | 0.38331100  | 2.85860200  | -0.01220600 |
| C  | -0.27024200 | 2.79420700  | -1.25137800 |
| C  | 0.92016500  | 4.08615800  | 0.41159000  |
| C  | -0.38502300 | 3.93264500  | -2.05247600 |
| H  | -0.68949300 | 1.85109200  | -1.59013300 |
| C  | 0.80900500  | 5.22056900  | -0.39175100 |
| H  | 1.44009900  | 4.15457200  | 1.36317000  |
| C  | 0.15542000  | 5.14566400  | -1.62492000 |

|    |             |             |             |
|----|-------------|-------------|-------------|
| H  | -0.89531900 | 3.86634000  | -3.00912000 |
| H  | 1.23383500  | 6.16259300  | -0.05573400 |
| H  | 0.07015400  | 6.03081200  | -2.24941400 |
| C  | 2.10934300  | 1.31539000  | 1.80789300  |
| C  | 2.30026400  | 0.69832300  | 3.05477600  |
| C  | 3.22633800  | 1.82256400  | 1.12717800  |
| C  | 3.57395500  | 0.61067800  | 3.61672200  |
| H  | 1.46284900  | 0.26485800  | 3.59356700  |
| C  | 4.49879500  | 1.73313800  | 1.69185800  |
| H  | 3.10785700  | 2.27114300  | 0.14758300  |
| C  | 4.67656500  | 1.13117300  | 2.93816600  |
| H  | 3.70277700  | 0.12817800  | 4.58166900  |
| H  | 5.35349000  | 2.12569700  | 1.14832100  |
| H  | 5.66951300  | 1.05801200  | 3.37288600  |
| C  | -3.52698900 | 0.63951000  | -0.68926300 |
| C  | -3.35913300 | 0.26360700  | -2.03464000 |
| C  | -4.43817100 | 1.66483600  | -0.38596400 |
| C  | -4.09107700 | 0.89329800  | -3.04179300 |
| H  | -2.65936700 | -0.52816400 | -2.28574300 |
| C  | -5.16396300 | 2.29666800  | -1.39857600 |
| H  | -4.59493100 | 1.98464800  | 0.63876100  |
| C  | -4.99324600 | 1.91231800  | -2.72872300 |
| H  | -3.95227000 | 0.58390200  | -4.07417500 |
| H  | -5.86287800 | 3.08880200  | -1.14321400 |
| H  | -5.55940600 | 2.40353700  | -3.51561200 |
| C  | -3.46481400 | -1.75749500 | 1.01376900  |
| C  | -4.86180200 | -1.81115100 | 0.90629700  |
| C  | -2.77273200 | -2.86044300 | 1.53472800  |
| C  | -5.55597800 | -2.94879500 | 1.32159300  |
| H  | -5.40960000 | -0.97142300 | 0.48812000  |
| C  | -3.47070500 | -3.99174700 | 1.95812900  |
| H  | -1.68835500 | -2.84538800 | 1.57753400  |
| C  | -4.86220100 | -4.03830800 | 1.85145300  |
| H  | -6.63802600 | -2.98404600 | 1.22643300  |
| H  | -2.92393000 | -4.84334700 | 2.35340000  |
| H  | -5.40349900 | -4.92470500 | 2.17130800  |
| C  | 3.86736400  | -1.22293400 | -1.17852800 |
| C  | 3.46530400  | -0.24054000 | -2.03381700 |
| C  | 2.11095200  | 0.15768300  | -1.77741200 |
| C  | 1.49599700  | -0.52333000 | -0.75157900 |
| S  | 2.60692000  | -1.69196100 | -0.07412900 |
| H  | 4.09292400  | 0.18120300  | -2.81085600 |
| H  | 1.61591000  | 0.92665000  | -2.36161600 |
| Br | 5.61670500  | -2.07845400 | -1.14552700 |
| Br | -0.84454500 | -2.36631700 | -1.43119000 |

### CP3

Energy (RB3LYP) = -3013.888025309811 A.U.

Free Energy = -3013.410125246395 A.U.

|    |             |             |             |
|----|-------------|-------------|-------------|
| Ni | 0.20653200  | -0.21184300 | 0.10088800  |
| P  | -0.40409400 | 1.81068800  | -0.86223500 |

|   |             |             |             |
|---|-------------|-------------|-------------|
| P | 2.29087700  | -0.25628200 | -0.92525000 |
| C | 2.44357000  | 0.72964000  | -2.51195100 |
| H | 3.48281200  | 0.67605200  | -2.85219300 |
| H | 1.84760700  | 0.20414500  | -3.26819200 |
| C | 0.46480800  | 2.37435000  | -2.41976100 |
| H | 0.02065700  | 1.79443500  | -3.23893200 |
| H | 0.20193500  | 3.42014900  | -2.61307600 |
| C | 1.99054500  | 2.19578500  | -2.42298000 |
| H | 2.38903800  | 2.72687300  | -3.29745400 |
| H | 2.43646500  | 2.68465100  | -1.54705500 |
| C | 0.00847700  | 3.13661500  | 0.35433300  |
| C | 0.24034000  | 2.76665200  | 1.68932800  |
| C | 0.11698500  | 4.49385900  | 0.00592200  |
| C | 0.56569000  | 3.72560700  | 2.65054400  |
| H | 0.16620400  | 1.72116100  | 1.97514800  |
| C | 0.44540400  | 5.45186900  | 0.96601600  |
| H | -0.06181100 | 4.81574200  | -1.01578100 |
| C | 0.66984200  | 5.06970100  | 2.29061500  |
| H | 0.73894500  | 3.41856900  | 3.67820500  |
| H | 0.52506300  | 6.49685900  | 0.67848300  |
| H | 0.92567400  | 5.81693500  | 3.03693200  |
| C | -2.15355300 | 2.10173400  | -1.36408900 |
| C | -2.74095000 | 1.17064900  | -2.23603200 |
| C | -2.90763400 | 3.20505400  | -0.94294000 |
| C | -4.04650000 | 1.35007700  | -2.69100300 |
| H | -2.18811300 | 0.28626200  | -2.54108500 |
| C | -4.21740100 | 3.37960600  | -1.39560200 |
| H | -2.48194600 | 3.92717800  | -0.25410800 |
| C | -4.78819800 | 2.45673200  | -2.27222600 |
| H | -4.48921400 | 0.61578100  | -3.35816000 |
| H | -4.79203500 | 4.23738200  | -1.05606300 |
| H | -5.80901400 | 2.59177100  | -2.61912800 |
| C | 3.74913500  | 0.32659100  | 0.03974400  |
| C | 3.59131700  | 0.62133500  | 1.40167200  |
| C | 5.01370700  | 0.50755400  | -0.54903800 |
| C | 4.66888500  | 1.09223500  | 2.15582400  |
| H | 2.63096500  | 0.45965700  | 1.87746700  |
| C | 6.08807600  | 0.97778700  | 0.20499100  |
| H | 5.17204100  | 0.26824000  | -1.59671700 |
| C | 5.91637000  | 1.27455000  | 1.55989300  |
| H | 4.52886300  | 1.31104700  | 3.21075200  |
| H | 7.05902400  | 1.11094200  | -0.26469700 |
| H | 6.75424800  | 1.64163300  | 2.14662600  |
| C | 2.74785700  | -1.92458200 | -1.56662400 |
| C | 3.87880700  | -2.63082100 | -1.13721700 |
| C | 1.88858700  | -2.52625400 | -2.50175900 |
| C | 4.15456400  | -3.90195000 | -1.64683700 |
| H | 4.54327200  | -2.19652600 | -0.39802800 |
| C | 2.16602300  | -3.79441400 | -3.01086400 |
| H | 0.98535900  | -2.01279500 | -2.82337800 |
| C | 3.30322100  | -4.48550400 | -2.58531800 |
| H | 5.03473200  | -4.43774000 | -1.30157400 |
| H | 1.48962900  | -4.24532100 | -3.73190700 |

|    |             |             |             |
|----|-------------|-------------|-------------|
| H  | 3.51837000  | -5.47560300 | -2.97776400 |
| C  | -3.92161500 | -1.40782900 | 0.81087300  |
| C  | -3.77359800 | -0.32932000 | 1.62972200  |
| C  | -2.44084600 | 0.19898200  | 1.57162300  |
| C  | -1.58479500 | -0.46506100 | 0.72287900  |
| S  | -2.44066000 | -1.80971800 | -0.01215000 |
| H  | -4.56839600 | 0.07794300  | 2.24460200  |
| H  | -2.14412000 | 1.06376000  | 2.15760300  |
| Br | -5.55075100 | -2.44467600 | 0.54569500  |
| C  | 0.70253700  | -1.63473400 | 1.28826300  |
| C  | 1.05994800  | -2.95220600 | 1.10867800  |
| S  | 0.72001300  | -1.28778500 | 3.01279700  |
| C  | 1.37493600  | -3.66038700 | 2.31539600  |
| H  | 1.09393100  | -3.42620700 | 0.13401300  |
| C  | 1.25737700  | -2.88878500 | 3.43615600  |
| H  | 1.67844100  | -4.70312800 | 2.33655800  |
| H  | 1.44187800  | -3.16133300 | 4.46726100  |

---

#### CP4

Energy (RB3LYP) = -3013.923239401618 A.U.

Free Energy = -3013.444334914759 A.U.

---

|    |             |             |             |
|----|-------------|-------------|-------------|
| Ni | -0.20140900 | -0.01919800 | 0.12711300  |
| P  | 1.55094500  | -0.33327900 | -1.22992200 |
| P  | -0.95244200 | 1.91285800  | -0.68864700 |
| C  | -0.69739600 | 2.07191700  | -2.53930200 |
| H  | -1.02777500 | 3.06522500  | -2.86503100 |
| H  | -1.35899400 | 1.34424400  | -3.02480300 |
| C  | 1.23601000  | 0.36784100  | -2.93939900 |
| H  | 0.47836600  | -0.28947000 | -3.38524100 |
| H  | 2.13708100  | 0.24425800  | -3.55200500 |
| C  | 0.75362500  | 1.83080700  | -2.99629300 |
| H  | 0.82748100  | 2.16094600  | -4.04137300 |
| H  | 1.43395000  | 2.47917400  | -2.42990500 |
| C  | 3.11151000  | 0.49656900  | -0.68525700 |
| C  | 3.46036200  | 0.39125100  | 0.67247000  |
| C  | 3.95904800  | 1.22027100  | -1.53910200 |
| C  | 4.62598300  | 0.98461700  | 1.15823400  |
| H  | 2.82242700  | -0.16840100 | 1.34912600  |
| C  | 5.11887800  | 1.82576800  | -1.04927700 |
| H  | 3.72631000  | 1.31763900  | -2.59474300 |
| C  | 5.45621600  | 1.70871600  | 0.29988300  |
| H  | 4.87922000  | 0.88150400  | 2.20992500  |
| H  | 5.75922300  | 2.38625400  | -1.72555500 |
| H  | 6.36000200  | 2.17842700  | 0.67909500  |
| C  | 2.11105600  | -2.03324000 | -1.70170800 |
| C  | 1.11988900  | -2.98074800 | -2.00867500 |
| C  | 3.45869000  | -2.41608700 | -1.78021400 |
| C  | 1.46859000  | -4.27328300 | -2.40256500 |
| H  | 0.07102000  | -2.71289400 | -1.91949600 |
| C  | 3.80532900  | -3.71311000 | -2.16491100 |
| H  | 4.24100300  | -1.70274800 | -1.54050900 |

|    |             |             |             |
|----|-------------|-------------|-------------|
| C  | 2.81295800  | -4.64316200 | -2.48040800 |
| H  | 0.68860100  | -4.99344700 | -2.63494000 |
| H  | 4.85380400  | -3.99524200 | -2.21911000 |
| H  | 3.08526500  | -5.65202500 | -2.77918100 |
| C  | -0.13685200 | 3.44995700  | -0.06526900 |
| C  | 0.84325600  | 3.33204900  | 0.93084800  |
| C  | -0.44108700 | 4.72783500  | -0.56600800 |
| C  | 1.50757900  | 4.46235000  | 1.41446700  |
| H  | 1.08837300  | 2.34903200  | 1.32294500  |
| C  | 0.22130100  | 5.85606600  | -0.08372700 |
| H  | -1.20976400 | 4.84590600  | -1.32536900 |
| C  | 1.19866100  | 5.72448200  | 0.90751300  |
| H  | 2.26695000  | 4.35203900  | 2.18372900  |
| H  | -0.02538600 | 6.83805700  | -0.47909300 |
| H  | 1.71472800  | 6.60460600  | 1.28212500  |
| C  | -2.75743400 | 2.28618900  | -0.53339800 |
| C  | -3.25049100 | 3.17654600  | 0.43414500  |
| C  | -3.68289300 | 1.56897400  | -1.31196000 |
| C  | -4.62473600 | 3.35873200  | 0.60337500  |
| H  | -2.55999400 | 3.73709000  | 1.05663800  |
| C  | -5.05559200 | 1.75643200  | -1.14684200 |
| H  | -3.33780800 | 0.84641000  | -2.04644700 |
| C  | -5.53230200 | 2.65368400  | -0.18850800 |
| H  | -4.98417000 | 4.05564900  | 1.35615500  |
| H  | -5.75213400 | 1.19439600  | -1.76330600 |
| H  | -6.60133100 | 2.79693300  | -0.05699700 |
| C  | -0.42708000 | -1.49657100 | 1.49218600  |
| C  | -1.46996100 | -0.50300900 | 1.59251300  |
| C  | -2.74955300 | -0.99023600 | 1.09734600  |
| C  | -2.69772400 | -2.27400800 | 0.68247700  |
| S  | -1.13145600 | -3.04740100 | 0.85654000  |
| H  | -1.45161200 | 0.27178700  | 2.35834500  |
| H  | -3.64248200 | -0.37836800 | 1.05302600  |
| C  | 0.72326000  | -1.61884900 | 2.39200700  |
| C  | 1.75363800  | -2.53454300 | 2.36772900  |
| S  | 0.94145600  | -0.51406600 | 3.74591400  |
| C  | 2.71524800  | -2.34620600 | 3.40512800  |
| H  | 1.82895400  | -3.30878000 | 1.61162800  |
| C  | 2.42606400  | -1.28700900 | 4.22003200  |
| H  | 3.59093600  | -2.97450200 | 3.53106300  |
| Br | -4.15327100 | -3.25352000 | -0.17225800 |
| H  | 2.97982600  | -0.91911400 | 5.07328000  |

-----

**CP5**

Energy (RB3LYP) = -3013.921189211170 A.U.

Free Energy = -3013.441716737629 A.U.

-----

|   |            |             |            |
|---|------------|-------------|------------|
| C | 4.31203300 | 1.12917200  | 0.25079100 |
| C | 4.62671000 | 0.17207800  | 1.16667500 |
| C | 3.47919900 | -0.26525100 | 1.89856400 |
| C | 2.30707300 | 0.35609200  | 1.53767000 |
| S | 2.61253400 | 1.51222400  | 0.23819800 |

|    |             |             |             |
|----|-------------|-------------|-------------|
| H  | 5.63031500  | -0.20266200 | 1.32875900  |
| H  | 3.52663900  | -1.01124600 | 2.68354400  |
| Br | 5.53599000  | 2.04097700  | -0.95088300 |
| C  | 0.94492700  | 0.17600900  | 2.04263400  |
| C  | -0.02395200 | 1.23374000  | 2.21000200  |
| S  | 0.67876900  | -1.10197900 | 3.29509500  |
| C  | -0.95198700 | 0.93371300  | 3.29110100  |
| H  | 0.20987400  | 2.26763800  | 1.96216200  |
| C  | -0.71697800 | -0.24026000 | 3.92593300  |
| H  | -1.75280300 | 1.61022800  | 3.57678900  |
| H  | -1.28626000 | -0.68019700 | 4.73562800  |
| Ni | -0.41797100 | 0.17693000  | 0.55339000  |
| P  | -0.04410000 | -1.57278400 | -0.78220100 |
| P  | -1.98479500 | 1.23127500  | -0.61185000 |
| C  | -0.24733400 | -1.12483100 | -2.59019900 |
| C  | -1.24279800 | -2.97312300 | -0.61584700 |
| C  | 1.57809300  | -2.45854700 | -0.76509200 |
| C  | -1.76377100 | 0.99328000  | -2.45620700 |
| C  | -3.72861900 | 0.70793400  | -0.28701100 |
| C  | -2.06790000 | 3.08087900  | -0.53927200 |
| H  | 0.56233400  | -0.43277700 | -2.85186900 |
| H  | -0.11198200 | -2.02365000 | -3.20350100 |
| C  | -1.60105700 | -0.46638800 | -2.92521500 |
| C  | -2.27120900 | -2.87854300 | 0.33171600  |
| C  | -1.16680600 | -4.12414400 | -1.41870100 |
| C  | 2.63562700  | -2.09986200 | -1.61534400 |
| C  | 1.80438400  | -3.45682400 | 0.19898500  |
| H  | -2.58972000 | 1.47385500  | -2.99430100 |
| H  | -0.86406200 | 1.56699700  | -2.71358100 |
| C  | -4.07185600 | 0.40862000  | 1.04324300  |
| C  | -4.71719400 | 0.58404300  | -1.27584300 |
| C  | -3.26559400 | 3.81113100  | -0.54663000 |
| C  | -0.85126700 | 3.78188600  | -0.48288100 |
| H  | -1.70674800 | -0.47361900 | -4.01838300 |
| H  | -2.42328700 | -1.08390500 | -2.54178300 |
| C  | -3.20964000 | -3.90492400 | 0.47015200  |
| H  | -2.33296000 | -1.99611400 | 0.96136900  |
| C  | -2.10277600 | -5.14829500 | -1.28189600 |
| H  | -0.36339000 | -4.22811800 | -2.14340200 |
| C  | 3.87673500  | -2.73285700 | -1.51800200 |
| H  | 2.50485600  | -1.32052500 | -2.35949300 |
| C  | 3.04390000  | -4.08877200 | 0.29426600  |
| H  | 1.00487800  | -3.74679000 | 0.87448400  |
| C  | -5.36782800 | 0.01281300  | 1.37572700  |
| H  | -3.31350300 | 0.48029700  | 1.81851200  |
| C  | -6.01181600 | 0.17641300  | -0.94474500 |
| H  | -4.48835200 | 0.80540200  | -2.31375900 |
| C  | -3.24538400 | 5.20724200  | -0.50442700 |
| H  | -4.21845900 | 3.29193200  | -0.58188200 |
| C  | -0.83170400 | 5.17656700  | -0.45383600 |
| H  | 0.08564300  | 3.23104100  | -0.45589400 |
| C  | -3.12797600 | -5.03930900 | -0.33710900 |
| H  | -4.00238800 | -3.81389300 | 1.20783400  |

|   |             |             |             |
|---|-------------|-------------|-------------|
| H | -2.03136800 | -6.03339700 | -1.90886500 |
| C | 4.08450800  | -3.73142400 | -0.56626000 |
| H | 4.68063000  | -2.44114900 | -2.18868600 |
| H | 3.19536800  | -4.86293900 | 1.04219700  |
| C | -6.34140200 | -0.10695000 | 0.38144100  |
| H | -5.61485000 | -0.20911800 | 2.41074000  |
| H | -6.76233000 | 0.08248300  | -1.72535200 |
| C | -2.03056500 | 5.89332000  | -0.46152600 |
| H | -4.18244300 | 5.75834400  | -0.50629400 |
| H | 0.11912200  | 5.70150100  | -0.41379800 |
| H | -3.85638800 | -5.83898500 | -0.23053300 |
| H | 5.04996800  | -4.22497100 | -0.49276000 |
| H | -7.34926500 | -0.42244100 | 0.63776800  |
| H | -2.01758100 | 6.97951600  | -0.42871400 |

-----

**CP6**

Energy (RB3LYP) = -3013.932680227658 A.U.

Free Energy = -3013.453952330182 A.U.

-----

|    |             |             |             |
|----|-------------|-------------|-------------|
| Ni | -0.17071900 | -0.49684500 | -0.58644900 |
| P  | -1.84916500 | -1.03464700 | 0.80365500  |
| P  | 1.37935500  | -1.94783800 | 0.13522800  |
| C  | 0.64588000  | -3.51514700 | 0.84486500  |
| H  | 1.44267700  | -4.14601100 | 1.25628000  |
| H  | 0.24690100  | -4.06221200 | -0.01917400 |
| C  | -1.82080500 | -2.83424700 | 1.31962800  |
| H  | -2.06914800 | -3.43649400 | 0.43669400  |
| H  | -2.61231600 | -3.00570600 | 2.05888900  |
| C  | -0.46899700 | -3.31041900 | 1.88891200  |
| H  | -0.64262600 | -4.27701600 | 2.38026200  |
| H  | -0.13233400 | -2.62922400 | 2.68071100  |
| C  | -1.75207900 | -0.18324100 | 2.44324200  |
| C  | -0.67788700 | 0.67756000  | 2.70720900  |
| C  | -2.72122200 | -0.38360200 | 3.44102900  |
| C  | -0.56618400 | 1.31725100  | 3.94475300  |
| H  | 0.06899400  | 0.85052500  | 1.93848500  |
| C  | -2.60963800 | 0.25338600  | 4.67590100  |
| H  | -3.57525500 | -1.02726200 | 3.24627100  |
| C  | -1.52960900 | 1.10447600  | 4.93041000  |
| H  | 0.27276400  | 1.98165200  | 4.13271900  |
| H  | -3.36707400 | 0.09094600  | 5.43841700  |
| H  | -1.44531800 | 1.60294200  | 5.89258400  |
| C  | -3.61640900 | -0.76699700 | 0.34369700  |
| C  | -4.46972800 | -1.80512100 | -0.05739700 |
| C  | -4.10636500 | 0.55059900  | 0.32562200  |
| C  | -5.78111100 | -1.53491100 | -0.45674700 |
| H  | -4.12364500 | -2.83387700 | -0.06440200 |
| C  | -5.41513900 | 0.81810000  | -0.07031700 |
| H  | -3.46029300 | 1.37146400  | 0.62476400  |
| C  | -6.25810400 | -0.22461800 | -0.46327600 |
| H  | -6.42803500 | -2.35323500 | -0.76232100 |
| H  | -5.77559400 | 1.84329100  | -0.07657400 |

|    |             |             |             |
|----|-------------|-------------|-------------|
| H  | -7.27782700 | -0.01550200 | -0.77519500 |
| C  | 2.51730900  | -1.32301400 | 1.44798000  |
| C  | 2.89875000  | 0.02826900  | 1.37390400  |
| C  | 3.00948700  | -2.10099500 | 2.50779900  |
| C  | 3.75859800  | 0.58142300  | 2.32320000  |
| H  | 2.51408700  | 0.64957300  | 0.56965600  |
| C  | 3.86278400  | -1.54447200 | 3.46366700  |
| H  | 2.73314700  | -3.14696100 | 2.59919400  |
| C  | 4.24122100  | -0.20401200 | 3.37236200  |
| H  | 4.04184800  | 1.62756600  | 2.24431900  |
| H  | 4.23101000  | -2.16095500 | 4.27959700  |
| H  | 4.90504800  | 0.22670800  | 4.11723100  |
| C  | 2.50537300  | -2.66995100 | -1.14225700 |
| C  | 3.85010100  | -2.98883000 | -0.90443800 |
| C  | 1.96302700  | -2.92560800 | -2.41307400 |
| C  | 4.63202300  | -3.55559000 | -1.91362400 |
| H  | 4.29225400  | -2.78978000 | 0.06718000  |
| C  | 2.74174900  | -3.50307900 | -3.41636000 |
| H  | 0.92786400  | -2.66176600 | -2.61785200 |
| C  | 4.08018700  | -3.81710000 | -3.16889300 |
| H  | 5.67452400  | -3.79235000 | -1.71688800 |
| H  | 2.30642600  | -3.69599700 | -4.39328000 |
| H  | 4.69111400  | -4.25717500 | -3.95251700 |
| C  | 0.83129100  | 2.80526700  | -1.26591400 |
| C  | 1.48867600  | 1.71220300  | -1.75549700 |
| C  | 0.64596600  | 0.58662500  | -2.10330100 |
| C  | -0.73749400 | 0.85454300  | -1.81765100 |
| S  | -0.93032100 | 2.53573800  | -1.21007000 |
| H  | 2.56344700  | 1.70563700  | -1.91768300 |
| H  | 0.95088700  | -0.10780200 | -2.88091800 |
| C  | 1.38545600  | 4.05811100  | -0.79412100 |
| C  | 0.75621200  | 5.27156100  | -0.61316400 |
| S  | 3.08405700  | 4.19319200  | -0.35498300 |
| C  | 1.62287100  | 6.30214300  | -0.14668000 |
| H  | -0.29592600 | 5.42149200  | -0.83015800 |
| C  | 2.91023200  | 5.87781400  | 0.03331700  |
| H  | 1.29914200  | 7.32085200  | 0.03854300  |
| Br | -2.15015700 | 0.24555100  | -3.15113200 |
| H  | 3.76770600  | 6.44816100  | 0.36420800  |

-----

**CP7**

Energy (RB3LYP) = -3013.926605224619 A.U.

Free Energy = -3013.448679807625 A.U.

-----

|    |            |             |             |
|----|------------|-------------|-------------|
| Ni | 1.28606000 | 0.29237800  | -0.85342700 |
| P  | 2.96580300 | -0.69117500 | 0.20857700  |
| P  | 1.16464800 | 2.20886500  | 0.27136100  |
| C  | 2.81772800 | 2.75860000  | 0.96110400  |
| H  | 2.68424800 | 3.65002400  | 1.58520300  |
| H  | 3.40670500 | 3.08339500  | 0.09352300  |
| C  | 4.19750000 | 0.55189700  | 0.87848400  |
| H  | 4.68913900 | 0.98306500  | -0.00322600 |

|   |             |             |             |
|---|-------------|-------------|-------------|
| H | 4.98456300  | 0.03042600  | 1.43594000  |
| C | 3.59232300  | 1.67809900  | 1.74036700  |
| H | 4.42004100  | 2.17723500  | 2.26233800  |
| H | 2.95618700  | 1.25251000  | 2.52719700  |
| C | 2.51225000  | -1.70706400 | 1.68428800  |
| C | 1.29861100  | -2.41365300 | 1.62617300  |
| C | 3.29157000  | -1.80604400 | 2.84846800  |
| C | 0.88341700  | -3.20546800 | 2.69767300  |
| H | 0.67917400  | -2.34298200 | 0.73595300  |
| C | 2.87014100  | -2.59102100 | 3.92405800  |
| H | 4.23485300  | -1.27405800 | 2.92756200  |
| C | 1.66622700  | -3.29382000 | 3.85048100  |
| H | -0.05661000 | -3.74689700 | 2.63262200  |
| H | 3.48422800  | -2.65245100 | 4.81890500  |
| H | 1.33915900  | -3.90394100 | 4.68831300  |
| C | 4.11069200  | -1.78327800 | -0.75438500 |
| C | 4.43075500  | -1.38764100 | -2.06429400 |
| C | 4.67280000  | -2.96652100 | -0.25374200 |
| C | 5.30600300  | -2.14208500 | -2.84562800 |
| H | 3.98159700  | -0.48559800 | -2.47420700 |
| C | 5.53882800  | -3.72920500 | -1.04113600 |
| H | 4.43149500  | -3.29882700 | 0.75127200  |
| C | 5.86098400  | -3.31823100 | -2.33546500 |
| H | 5.54504300  | -1.81870000 | -3.85550200 |
| H | 5.96177400  | -4.64685600 | -0.64021100 |
| H | 6.53458600  | -3.91368400 | -2.94598800 |
| C | 0.05506700  | 2.15955100  | 1.74706800  |
| C | -1.03464000 | 1.27356100  | 1.70114400  |
| C | 0.23498700  | 2.94223400  | 2.89937500  |
| C | -1.92623000 | 1.18094200  | 2.77096300  |
| H | -1.18266600 | 0.65442600  | 0.82056100  |
| C | -0.65109200 | 2.84252100  | 3.97390600  |
| H | 1.06504500  | 3.63943900  | 2.96717700  |
| C | -1.73437500 | 1.96350300  | 3.91099300  |
| H | -2.76591700 | 0.49399100  | 2.71191100  |
| H | -0.49488400 | 3.45330800  | 4.85941600  |
| H | -2.42368700 | 1.88784000  | 4.74778000  |
| C | 0.66733300  | 3.75115000  | -0.62658500 |
| C | -0.24127000 | 4.69537100  | -0.12752000 |
| C | 1.23383700  | 3.96829400  | -1.89477900 |
| C | -0.56646200 | 5.83126800  | -0.87371000 |
| H | -0.70151400 | 4.54519900  | 0.84405500  |
| C | 0.91995500  | 5.10888900  | -2.63311800 |
| H | 1.91943300  | 3.23176100  | -2.30870400 |
| C | 0.01521000  | 6.04414000  | -2.12403000 |
| H | -1.27656100 | 6.55071800  | -0.47392500 |
| H | 1.37201000  | 5.26197300  | -3.60973600 |
| H | -0.23913800 | 6.92858700  | -2.70197400 |
| C | -1.77007100 | -1.02590500 | -1.77434000 |
| C | -1.36517600 | 0.24153700  | -2.09032500 |
| C | 0.03027700  | 0.37082400  | -2.44412900 |
| C | 0.72862400  | -0.87910100 | -2.35422300 |
| S | -0.43033300 | -2.18870000 | -1.92952100 |

|    |             |             |             |
|----|-------------|-------------|-------------|
| H  | -2.04579500 | 1.08896600  | -2.09114300 |
| H  | 0.36754500  | 1.19228800  | -3.07246000 |
| C  | -3.07429200 | -1.47495400 | -1.33629900 |
| C  | -3.57665100 | -2.75761800 | -1.27731700 |
| S  | -4.28610800 | -0.32462800 | -0.76824400 |
| C  | -4.91933500 | -2.83970900 | -0.80345500 |
| H  | -3.00154600 | -3.62437500 | -1.58459100 |
| C  | -5.42637800 | -1.61091300 | -0.49835100 |
| H  | -5.47618500 | -3.76366000 | -0.70370800 |
| Br | -7.20927500 | -1.22194600 | 0.15893000  |
| H  | 1.53404600  | -1.18460200 | -3.01604800 |

-----

**TS1**

Energy (RB3LYP) = -2474.667287331640 A.U.

Free Energy = -2474.242280460076 A.U.

-----

|    |             |             |             |
|----|-------------|-------------|-------------|
| Ni | 0.31288000  | -0.46831500 | -0.37341500 |
| P  | -0.64929300 | 1.39360300  | -1.22708300 |
| P  | 2.46109300  | 0.23458500  | -0.31938500 |
| C  | 2.85196400  | 1.43873600  | -1.69116100 |
| H  | 3.88692700  | 1.78757100  | -1.59257500 |
| H  | 2.82030300  | 0.84173500  | -2.61169200 |
| C  | 0.49613400  | 2.32508100  | -2.38229400 |
| H  | 0.59370600  | 1.71013400  | -3.28532100 |
| H  | 0.00959400  | 3.25687500  | -2.69276500 |
| C  | 1.89367400  | 2.64026200  | -1.81332500 |
| H  | 2.36421100  | 3.36682500  | -2.48922300 |
| H  | 1.79758400  | 3.15108800  | -0.84677600 |
| C  | -1.02159900 | 2.65235000  | 0.07298500  |
| C  | -1.03076800 | 2.24355700  | 1.41501400  |
| C  | -1.29286700 | 3.99933500  | -0.22353400 |
| C  | -1.30203100 | 3.15654200  | 2.43682200  |
| H  | -0.82674400 | 1.20368400  | 1.65398100  |
| C  | -1.55770100 | 4.91260700  | 0.79690600  |
| H  | -1.31220200 | 4.33946000  | -1.25531900 |
| C  | -1.56204100 | 4.49229300  | 2.12986500  |
| H  | -1.30799100 | 2.82175100  | 3.47045200  |
| H  | -1.76423800 | 5.95118500  | 0.55178700  |
| H  | -1.76989600 | 5.20453000  | 2.92400500  |
| C  | -2.19379100 | 1.31723900  | -2.23464700 |
| C  | -2.15867400 | 0.65825600  | -3.47610100 |
| C  | -3.41879600 | 1.82907100  | -1.77899700 |
| C  | -3.31039800 | 0.54488600  | -4.25338000 |
| H  | -1.23570700 | 0.20895600  | -3.83012800 |
| C  | -4.57298400 | 1.70494600  | -2.55569200 |
| H  | -3.47635200 | 2.32754600  | -0.81714900 |
| C  | -4.52169000 | 1.06933200  | -3.79638100 |
| H  | -3.26294500 | 0.03360000  | -5.21107500 |
| H  | -5.51282900 | 2.10683900  | -2.18620300 |
| H  | -5.42050800 | 0.97381700  | -4.39962900 |
| C  | 2.96613800  | 1.09811800  | 1.23042900  |
| C  | 2.43671400  | 0.61028900  | 2.43737600  |



|    |             |             |             |
|----|-------------|-------------|-------------|
| C  | 3.83873800  | 2.19660300  | 1.27516100  |
| C  | 2.78585700  | 1.19204600  | 3.65596800  |
| H  | 1.74260900  | -0.22615200 | 2.41351300  |
| C  | 4.17908200  | 2.78629000  | 2.49500900  |
| H  | 4.25969400  | 2.60417400  | 0.36094800  |
| C  | 3.65701700  | 2.28336900  | 3.68746000  |
| H  | 2.37043500  | 0.79845400  | 4.57983000  |
| H  | 4.85294000  | 3.63886400  | 2.51105300  |
| H  | 3.92322400  | 2.74265400  | 4.63562900  |
| C  | 3.77023000  | -1.04265900 | -0.58002500 |
| C  | 5.09848300  | -0.87115900 | -0.16014900 |
| C  | 3.41345300  | -2.22157800 | -1.25407400 |
| C  | 6.05216500  | -1.85701500 | -0.41648000 |
| H  | 5.38788100  | 0.02615800  | 0.37948100  |
| C  | 4.37235000  | -3.20264000 | -1.51575400 |
| H  | 2.38388500  | -2.37319200 | -1.56978500 |
| C  | 5.69169800  | -3.02277400 | -1.09695500 |
| H  | 7.07660100  | -1.71593900 | -0.08163500 |
| H  | 4.08302000  | -4.10988700 | -2.03922600 |
| H  | 6.43589500  | -3.78999900 | -1.29366900 |
| C  | -2.27071700 | -2.09494500 | 2.09762400  |
| C  | -0.96709100 | -2.46339600 | 2.20062800  |
| C  | -0.25120800 | -2.27943900 | 0.96136700  |
| C  | -1.04175400 | -1.66679900 | -0.02652700 |
| S  | -2.70472500 | -1.44286500 | 0.52450600  |
| H  | -0.53931200 | -2.91773200 | 3.08733600  |
| H  | 0.67290000  | -2.80120700 | 0.74454300  |
| Br | -3.61374800 | -2.22484000 | 3.49942900  |
| Br | -0.58831600 | -2.51684000 | -2.11864800 |

## TS2

Energy (RB3LYP) = -3013.872841600292 A.U.

Free Energy = -3013.395035631298 A.U.

|    |             |             |             |
|----|-------------|-------------|-------------|
| Ni | 0.07849700  | -0.18839200 | 0.14444600  |
| P  | -0.28484400 | 1.89597300  | -0.77762400 |
| P  | 2.01518700  | -0.63751500 | -1.01317500 |
| C  | 2.00825300  | 0.12031400  | -2.72446700 |
| H  | 2.93128800  | -0.16657700 | -3.24187400 |
| H  | 1.17312600  | -0.32133300 | -3.28207800 |
| C  | 0.43679800  | 2.18102300  | -2.48077100 |
| H  | -0.26129600 | 1.68331200  | -3.16665000 |
| H  | 0.38171900  | 3.24977400  | -2.72171200 |
| C  | 1.86299700  | 1.65436700  | -2.72861600 |
| H  | 2.17463900  | 2.01357300  | -3.71854800 |
| H  | 2.56752600  | 2.09820300  | -2.01477600 |
| C  | 0.57106500  | 3.13081600  | 0.30008200  |
| C  | 0.33856800  | 3.04224500  | 1.68472200  |
| C  | 1.43797200  | 4.12969700  | -0.16852900 |
| C  | 0.94762500  | 3.93012700  | 2.57075000  |
| H  | -0.32450600 | 2.27150500  | 2.06778500  |
| C  | 2.05559100  | 5.01397900  | 0.72050700  |

|    |             |             |             |
|----|-------------|-------------|-------------|
| H  | 1.64172800  | 4.22988800  | -1.22983900 |
| C  | 1.81171300  | 4.91786900  | 2.09063500  |
| H  | 0.75172300  | 3.84587200  | 3.63624300  |
| H  | 2.72677000  | 5.77849600  | 0.33788200  |
| H  | 2.29184600  | 5.60658600  | 2.78056900  |
| C  | -1.95499600 | 2.65187000  | -1.01985700 |
| C  | -3.05019000 | 1.80578900  | -1.24716000 |
| C  | -2.15579800 | 4.04192700  | -1.02748900 |
| C  | -4.31833200 | 2.33873100  | -1.48978700 |
| H  | -2.91583800 | 0.72941200  | -1.22351300 |
| C  | -3.42395500 | 4.57195500  | -1.26573100 |
| H  | -1.32315200 | 4.71330900  | -0.83723900 |
| C  | -4.50748800 | 3.72108300  | -1.49936400 |
| H  | -5.15718600 | 1.66895800  | -1.65785100 |
| H  | -3.56648000 | 5.64963000  | -1.26590500 |
| H  | -5.49568700 | 4.13554300  | -1.68113700 |
| C  | 3.63878000  | -0.04618500 | -0.35926000 |
| C  | 3.65529800  | 0.84107600  | 0.72616000  |
| C  | 4.85913400  | -0.43401700 | -0.93906300 |
| C  | 4.86582700  | 1.33881000  | 1.21700300  |
| H  | 2.72114800  | 1.13600100  | 1.19278700  |
| C  | 6.06571700  | 0.06154200  | -0.44776300 |
| H  | 4.86599400  | -1.13680200 | -1.76809600 |
| C  | 6.07054300  | 0.95111000  | 0.63138500  |
| H  | 4.86165800  | 2.02533700  | 2.05918000  |
| H  | 7.00280400  | -0.24786100 | -0.90340300 |
| H  | 7.01233900  | 1.33480500  | 1.01502400  |
| C  | 2.34623800  | -2.41807900 | -1.35619300 |
| C  | 2.86457500  | -3.21883500 | -0.32267800 |
| C  | 2.01945600  | -3.02926200 | -2.57738100 |
| C  | 3.07107700  | -4.58428200 | -0.51655000 |
| H  | 3.11244500  | -2.77334800 | 0.63558800  |
| C  | 2.22210800  | -4.39819100 | -2.76690800 |
| H  | 1.60789600  | -2.44591800 | -3.39484700 |
| C  | 2.75136400  | -5.17922600 | -1.73900900 |
| H  | 3.47846000  | -5.18458400 | 0.29263900  |
| H  | 1.96788600  | -4.85072600 | -3.72184200 |
| H  | 2.91032100  | -6.24386900 | -1.88780800 |
| C  | -3.95412500 | -1.44759400 | 0.59558500  |
| C  | -3.81122600 | -0.61882800 | 1.67095500  |
| C  | -2.45463100 | -0.23551700 | 1.88181700  |
| C  | -1.54778600 | -0.75008100 | 0.96433200  |
| S  | -2.43126200 | -1.78081400 | -0.19091300 |
| H  | -4.63743200 | -0.29866600 | 2.29591700  |
| H  | -2.14429000 | 0.37267100  | 2.72490300  |
| Br | -5.61531200 | -2.22386600 | -0.05605400 |
| C  | 0.08172300  | -1.46547400 | 1.56505700  |
| C  | 0.19267600  | -2.84365100 | 1.68856400  |
| S  | 0.77262100  | -0.71347200 | 3.02092800  |
| C  | 0.82413800  | -3.28050800 | 2.88920600  |
| H  | -0.20902800 | -3.52599400 | 0.94807500  |
| C  | 1.19581800  | -2.25615800 | 3.71671300  |
| H  | 0.98597700  | -4.32700900 | 3.13010900  |

H 1.68955300 -2.30882300 4.67816500

**TS3**

Energy (RB3LYP) = -3013.907788216182 A.U.

Free Energy = -3013.427909077884 A.U.

-----  
Ni -0.14052300 -0.49667600 0.04186800  
P 1.17746300 0.47264100 -1.44281300  
P -2.12524100 -0.20107500 -0.87380900  
C -2.02871700 -0.30238500 -2.74491100  
H -3.02024100 -0.10576000 -3.17005300  
H -1.76707000 -1.33447000 -3.00742800  
C 0.48152900 0.28066600 -3.17425000  
H 0.62778900 -0.77828300 -3.42374600  
H 1.10661500 0.84386400 -3.87799300  
C -0.99988800 0.66053000 -3.36825900  
H -1.19089500 0.68773400 -4.44986000  
H -1.18186700 1.68090500 -3.00805800  
C 1.31898400 2.30611500 -1.22268900  
C 1.54626500 2.77878100 0.08100600  
C 1.21564000 3.24282700 -2.26315500  
C 1.67629900 4.14416800 0.33624700  
H 1.61973100 2.07142500 0.90166100  
C 1.33309800 4.61164400 -2.00647000  
H 1.04444800 2.91643800 -3.28425200  
C 1.56534300 5.06588400 -0.70753600  
H 1.85527400 4.48211700 1.35349500  
H 1.24434800 5.32140500 -2.82508200  
H 1.65725300 6.13079300 -0.51023200  
C 2.93220200 -0.03268500 -1.77883900  
C 3.25303000 -1.39371700 -1.66044900  
C 3.93687900 0.86546300 -2.17095300  
C 4.54041000 -1.85055700 -1.94608000  
H 2.49287300 -2.09639800 -1.33282100  
C 5.22778500 0.40928900 -2.44539700  
H 3.71551700 1.92471600 -2.25942900  
C 5.53226700 -0.94919400 -2.33742300  
H 4.76913800 -2.90861100 -1.84874800  
H 5.99625100 1.11792200 -2.74432500  
H 6.53818700 -1.30169800 -2.55033100  
C -3.00180900 1.41727100 -0.65673700  
C -2.38965200 2.41018100 0.12105300  
C -4.23674800 1.70283900 -1.26538700  
C -2.99289800 3.66015900 0.28669300  
H -1.43286700 2.20252900 0.59151500  
C -4.84016200 2.94888300 -1.09963200  
H -4.73802000 0.94328600 -1.85998300  
C -4.21746500 3.93126900 -0.32318100  
H -2.50107800 4.41843000 0.88987700  
H -5.79615400 3.15439500 -1.57461700  
H -4.68830900 4.90261400 -0.19553100  
C -3.44950000 -1.43903000 -0.49416700

C -4.46653400 -1.16931900 0.43802300  
C -3.36639700 -2.74000300 -1.02435100  
C -5.38086500 -2.15768500 0.80827300  
H -4.55409900 -0.17689600 0.86990000  
C -4.28428000 -3.72536000 -0.65849500  
H -2.57687300 -2.99449200 -1.72663700  
C -5.29756500 -3.43799800 0.25882000  
H -6.16208000 -1.92258900 1.52676200  
H -4.20451300 -4.71994600 -1.08979700  
H -6.01073100 -4.20589300 0.54580400  
C 0.81939500 -0.45672400 2.40940600  
C -0.44732800 -0.96535900 2.08243800  
C -0.38317100 -2.20349900 1.35801200  
C 0.92751000 -2.57661200 1.12594000  
S 2.10920500 -1.64200700 2.04322800  
H -1.37481700 -0.53818900 2.44758400  
H -1.24492500 -2.79475700 1.07459800  
C 1.13514000 0.72669500 3.17728200  
C 2.37235600 1.20918700 3.55920300  
S -0.13325500 1.78928300 3.77913200  
C 2.30705000 2.40966300 4.32455700  
H 3.30204000 0.71881400 3.29071400  
C 1.02776000 2.84895500 4.52464600  
H 3.18175200 2.92267100 4.71009800  
Br 1.45553700 -4.29111600 0.36086800  
H 0.68985200 3.72197100 5.06638400

**TS4**

Energy (RB3LYP) = -3013.907241709024 A.U.

Free Energy = -3013.426547463246 A.U.

-----  
C 3.32726300 -2.09862100 0.29992400  
C 2.28546300 -2.73000600 -0.31350700  
C 1.02943400 -2.39038700 0.27668800  
C 1.13385300 -1.46803000 1.31875800  
S 2.84373700 -1.06900900 1.61191400  
H 2.40173200 -3.42044800 -1.14026800  
H 0.09876600 -2.87672000 0.01264500  
Br 5.20138100 -2.26889700 -0.18170200  
C 0.06463800 -0.99743100 2.18945000  
C -0.02748400 0.27938900 2.76236500  
S -1.15509000 -2.07474800 2.90931600  
C -1.10568500 0.39319800 3.69555400  
H 0.72318700 1.04542300 2.61422900  
C -1.79564100 -0.77365500 3.86983600  
H -1.34186000 1.30959900 4.22652000  
H -2.65104400 -0.95062400 4.50919500  
Ni -0.20299600 -0.11044700 0.31239700  
P -1.98961200 -0.64136200 -0.90042700  
P 0.59140200 1.69099600 -0.69942300  
C -1.77240900 -0.06383200 -2.67539100  
C -3.61305800 0.13280100 -0.43642800

|   |             |             |             |
|---|-------------|-------------|-------------|
| C | -2.49804600 | -2.40807000 | -1.18988900 |
| C | 0.18296900  | 1.65530100  | -2.53311800 |
| C | -0.12574500 | 3.34711900  | -0.25435100 |
| C | 2.40783500  | 2.06859300  | -0.73112000 |
| H | -1.03035000 | -0.72739200 | -3.13495300 |
| H | -2.70505100 | -0.21706000 | -3.23020700 |
| C | -1.30700700 | 1.39697500  | -2.83534400 |
| C | -3.75851200 | 0.62940700  | 0.86735200  |
| C | -4.70576200 | 0.22947200  | -1.31426500 |
| C | -1.72464900 | -3.24082100 | -2.01940200 |
| C | -3.58140000 | -2.98434500 | -0.50544800 |
| H | 0.49452800  | 2.60245700  | -2.98934300 |
| H | 0.78585400  | 0.86443400  | -2.99533700 |
| C | -1.13900700 | 3.41253000  | 0.71128400  |
| C | 0.28302200  | 4.53796300  | -0.88004500 |
| C | 2.97637700  | 2.93103900  | 0.22238900  |
| C | 3.27093800  | 1.40099300  | -1.61577100 |
| H | -1.48365000 | 1.68305400  | -3.88100000 |
| H | -1.93767500 | 2.06562900  | -2.23500300 |
| C | -4.95884300 | 1.21234500  | 1.28261200  |
| H | -2.92699400 | 0.54723200  | 1.56142300  |
| C | -5.90129700 | 0.82078800  | -0.90513300 |
| H | -4.63543900 | -0.16913500 | -2.32239100 |
| C | -2.03756000 | -4.59179700 | -2.17825500 |
| H | -0.86594000 | -2.83737400 | -2.54992400 |
| C | -3.89031300 | -4.33718200 | -0.65872800 |
| H | -4.19428200 | -2.37124600 | 0.14772300  |
| C | -1.73468000 | 4.63297200  | 1.04307400  |
| H | -1.45985700 | 2.49700600  | 1.19823000  |
| C | -0.30750000 | 5.75681600  | -0.54861300 |
| H | 1.07904900  | 4.51576900  | -1.61973700 |
| C | 4.35588100  | 3.13272100  | 0.27630100  |
| H | 2.33579300  | 3.46047500  | 0.92198600  |
| C | 4.65077600  | 1.60508200  | -1.56445800 |
| H | 2.87360300  | 0.70601800  | -2.34988200 |
| C | -6.03037800 | 1.31565000  | 0.39536700  |
| H | -5.05324400 | 1.58673400  | 2.29888300  |
| H | -6.73439000 | 0.89072400  | -1.59997900 |
| C | -3.12369100 | -5.14658800 | -1.49849900 |
| H | -1.43041500 | -5.21061200 | -2.83436500 |
| H | -4.73661000 | -4.75736200 | -0.12101900 |
| C | -1.32036200 | 5.80667100  | 0.41408600  |
| H | -2.52273400 | 4.66319600  | 1.79118000  |
| H | 0.02233200  | 6.66864500  | -1.04014000 |
| C | 5.19959100  | 2.47315500  | -0.61949800 |
| H | 4.77079200  | 3.80917600  | 1.01943600  |
| H | 5.29690500  | 1.07788600  | -2.26128700 |
| H | -6.96272400 | 1.77478500  | 0.71375800  |
| H | -3.36698500 | -6.19868500 | -1.61966800 |
| H | -1.78109600 | 6.75701700  | 0.67112400  |
| H | 6.27409800  | 2.62964900  | -0.57795500 |

### TS5

Energy (RB3LYP) = -3013.907253938963 A.U.

Free Energy = -3013.430103025902 A.U.

|    |             |             |             |
|----|-------------|-------------|-------------|
| Ni | -1.16322500 | 0.02101100  | -0.71215400 |
| P  | -1.60709100 | 1.68628900  | 0.65427700  |
| P  | -1.86257600 | -1.72438300 | 0.42384700  |
| C  | -3.34120900 | -1.29393600 | 1.49765200  |
| H  | -3.61090600 | -2.16446700 | 2.10756200  |
| H  | -4.19064500 | -1.09267200 | 0.83389700  |
| C  | -3.11081300 | 1.29793200  | 1.70791300  |
| H  | -3.96686000 | 1.36329000  | 1.02385400  |
| H  | -3.25546400 | 2.09677600  | 2.44527300  |
| C  | -3.10984800 | -0.07403500 | 2.41100500  |
| H  | -3.91925500 | -0.06256300 | 3.15374600  |
| H  | -2.18277900 | -0.20684900 | 2.98325600  |
| C  | -0.27442400 | 2.02123300  | 1.89642900  |
| C  | 1.05368200  | 1.97425000  | 1.43970500  |
| C  | -0.50402300 | 2.31054400  | 3.25100500  |
| C  | 2.11937200  | 2.21949800  | 2.30640400  |
| H  | 1.25189500  | 1.73769500  | 0.39829900  |
| C  | 0.56298500  | 2.54393800  | 4.12254000  |
| H  | -1.51626700 | 2.35791500  | 3.64073700  |
| C  | 1.87656300  | 2.50124100  | 3.65267800  |
| H  | 3.13735500  | 2.17915000  | 1.92818000  |
| H  | 0.36478800  | 2.76009100  | 5.16931400  |
| H  | 2.70524700  | 2.68269100  | 4.33209800  |
| C  | -2.08907100 | 3.39222300  | 0.09090500  |
| C  | -2.93274200 | 3.49622300  | -1.02679600 |
| C  | -1.67484700 | 4.57078000  | 0.72894400  |
| C  | -3.36970500 | 4.74030400  | -1.48164500 |
| H  | -3.23643100 | 2.59191800  | -1.54862600 |
| C  | -2.10010500 | 5.81805200  | 0.26475700  |
| H  | -1.01585700 | 4.51951200  | 1.59001600  |
| C  | -2.95138000 | 5.90706400  | -0.83743600 |
| H  | -4.02685200 | 4.79999100  | -2.34573500 |
| H  | -1.76482000 | 6.72132300  | 0.76838900  |
| H  | -3.28129600 | 6.87831100  | -1.19671500 |
| C  | -0.74828100 | -2.50897000 | 1.68066800  |
| C  | 0.52261800  | -1.95425700 | 1.88677200  |
| C  | -1.13649500 | -3.61358400 | 2.45913100  |
| C  | 1.38713000  | -2.48672900 | 2.84754200  |
| H  | 0.83109300  | -1.09826600 | 1.29355000  |
| C  | -0.27458600 | -4.14674900 | 3.41674000  |
| H  | -2.11127300 | -4.06993000 | 2.30625700  |
| C  | 0.98990600  | -3.58262100 | 3.61325700  |
| H  | 2.36804400  | -2.04268700 | 2.99332800  |
| H  | -0.58737900 | -5.00291300 | 4.00916600  |
| H  | 1.66110400  | -3.99932100 | 4.35978500  |
| C  | -2.48817400 | -3.18425500 | -0.52971200 |
| C  | -1.66748800 | -4.29941500 | -0.77581100 |
| C  | -3.74159700 | -3.13433000 | -1.16711200 |
| C  | -2.09336300 | -5.33475400 | -1.60992300 |

|    |             |             |             |
|----|-------------|-------------|-------------|
| H  | -0.69279800 | -4.36715700 | -0.30156000 |
| C  | -4.16928200 | -4.17231400 | -1.99627200 |
| H  | -4.39561200 | -2.27888000 | -1.01982800 |
| C  | -3.34732200 | -5.27880000 | -2.22079600 |
| H  | -1.44245800 | -6.18895500 | -1.77862200 |
| H  | -5.14732000 | -4.11494200 | -2.46752100 |
| H  | -3.67938700 | -6.08619300 | -2.86771100 |
| C  | 0.85778300  | 0.41712100  | -2.26827500 |
| C  | 0.05464200  | -0.73454100 | -2.28992900 |
| C  | -1.25443500 | -0.48381400 | -2.82325800 |
| C  | -1.43598500 | 0.84547300  | -3.15755000 |
| S  | 0.05477500  | 1.77380900  | -3.10704500 |
| H  | 0.43089200  | -1.72737500 | -2.06925000 |
| H  | -2.00594200 | -1.25202600 | -2.96564600 |
| C  | 2.24142200  | 0.53126600  | -1.87477600 |
| C  | 3.07597800  | 1.63168100  | -1.93270000 |
| S  | 3.11493700  | -0.85343900 | -1.21283400 |
| C  | 4.39992500  | 1.38748300  | -1.46315900 |
| H  | 2.74849300  | 2.59689200  | -2.30377700 |
| C  | 4.56316800  | 0.09961400  | -1.04452000 |
| H  | 5.18563700  | 2.13316100  | -1.44100000 |
| Br | 6.17784500  | -0.69227000 | -0.31973500 |
| H  | -2.31962300 | 1.28623700  | -3.59975800 |

-----

## CPs and TSs with Ni(0)NHC

### Ni(0)NHC

Energy (RB3LYP) = -1329.315385641056A.U.

Free Energy = -1328.807160728671 A.U.

|    |             |             |             |
|----|-------------|-------------|-------------|
| Ni | -0.00001400 | -0.00001000 | -1.89737200 |
| C  | 0.67722700  | 0.00001200  | 2.06758100  |
| C  | -0.67719500 | 0.00001200  | 2.06759100  |
| H  | 1.38855000  | 0.00001600  | 2.87877400  |
| H  | -1.38850600 | 0.00001700  | 2.87879500  |
| N  | 1.08278600  | 0.00000500  | 0.73411900  |
| N  | -1.08277500 | 0.00000500  | 0.73413600  |
| C  | -0.00000100 | 0.00000000  | -0.12536300 |
| C  | -2.46222100 | 0.00000200  | 0.31918800  |
| C  | -3.11852100 | 1.23466300  | 0.13922200  |
| C  | -3.11851900 | -1.23466200 | 0.13923600  |
| C  | -4.46417800 | 1.20589800  | -0.24701700 |
| C  | -4.46417700 | -1.20590300 | -0.24700300 |
| C  | -5.13279500 | -0.00000400 | -0.43995100 |
| H  | -4.99389800 | 2.14162500  | -0.40243600 |
| H  | -4.99389600 | -2.14163200 | -0.40241200 |
| H  | -6.17726900 | -0.00000600 | -0.74093800 |
| C  | 2.46222600  | 0.00000200  | 0.31915000  |
| C  | 3.11852300  | 1.23466300  | 0.13917400  |
| C  | 3.11852100  | -1.23466200 | 0.13918700  |
| C  | 4.46417400  | 1.20589800  | -0.24708500 |
| C  | 4.46417300  | -1.20590300 | -0.24707300 |
| C  | 5.13278800  | -0.00000400 | -0.44003000 |
| H  | 4.99389200  | 2.14162500  | -0.40251200 |
| H  | 4.99389000  | -2.14163200 | -0.40249000 |
| H  | 6.17725700  | -0.00000600 | -0.74103300 |
| C  | -2.40857200 | 2.57267500  | 0.31913600  |
| C  | -3.13109300 | 3.48091800  | 1.33200500  |
| C  | -2.22037300 | 3.27943500  | -1.03745200 |
| H  | -1.40938300 | 2.37303200  | 0.71703200  |
| H  | -3.24605500 | 2.98590400  | 2.30321500  |
| H  | -2.56032800 | 4.40422900  | 1.48674700  |
| H  | -4.13035700 | 3.76712100  | 0.98363100  |
| H  | -1.64362000 | 2.64396300  | -1.71883600 |
| H  | -3.18494800 | 3.50531800  | -1.50816100 |
| H  | -1.68021200 | 4.22501400  | -0.90521000 |
| C  | -2.40856900 | -2.57267100 | 0.31916500  |
| C  | -2.22036900 | -3.27944600 | -1.03741500 |
| C  | -3.13109000 | -3.48090400 | 1.33204400  |
| H  | -1.40938100 | -2.37302200 | 0.71705900  |
| H  | -1.64361700 | -2.64398100 | -1.71880600 |
| H  | -1.68020700 | -4.22502300 | -0.90516200 |
| H  | -3.18494300 | -3.50533500 | -1.50812200 |
| H  | -3.24605300 | -2.98588000 | 2.30324800  |
| H  | -4.13035300 | -3.76711100 | 0.98367200  |
| H  | -2.56032400 | -4.40421300 | 1.48679600  |
| C  | 2.40857700  | 2.57267500  | 0.31910000  |

|   |            |             |             |
|---|------------|-------------|-------------|
| C | 2.22035700 | 3.27943500  | -1.03748500 |
| C | 3.13111400 | 3.48091700  | 1.33195800  |
| H | 1.40939500 | 2.37303100  | 0.71701100  |
| H | 1.64359300 | 2.64396400  | -1.71886100 |
| H | 1.68019700 | 4.22501400  | -0.90523400 |
| H | 3.18492400 | 3.50531900  | -1.50820900 |
| H | 3.24609100 | 2.98590400  | 2.30316600  |
| H | 4.13037200 | 3.76712000  | 0.98356800  |
| H | 2.56035100 | 4.40422900  | 1.48670900  |
| C | 2.40857400 | -2.57267100 | 0.31912800  |
| C | 3.13111000 | -3.48090400 | 1.33199500  |
| C | 2.22035300 | -3.27944600 | -1.03745000 |
| H | 1.40939200 | -2.37302200 | 0.71703600  |
| H | 3.24608800 | -2.98588000 | 2.30319800  |
| H | 2.56034600 | -4.40421300 | 1.48675600  |
| H | 4.13036800 | -3.76711100 | 0.98360800  |
| H | 1.64359000 | -2.64398100 | -1.71883200 |
| H | 3.18492000 | -3.50533600 | -1.50817200 |
| H | 1.68019200 | -4.22502200 | -0.90518900 |

### CP1

Energy (RB3LYP) = -1907.480039673722 A.U.

Free Energy = -1906.940249014491 A.U.

|    |             |             |             |
|----|-------------|-------------|-------------|
| Ni | 0.10993400  | -0.29098900 | -0.62756800 |
| C  | 3.46972000  | -0.95561600 | -0.57978400 |
| C  | 3.02070800  | 0.25813000  | -0.98523300 |
| C  | 1.76389400  | 0.17985000  | -1.70504800 |
| C  | 1.27686100  | -1.16485800 | -1.78544200 |
| S  | 2.42433900  | -2.30091500 | -0.99460400 |
| H  | 3.55522600  | 1.18496300  | -0.81071500 |
| H  | 1.48942800  | 0.94824900  | -2.42239800 |
| Br | 0.36759400  | -1.88382300 | -3.46494300 |
| Br | 5.06297700  | -1.27586700 | 0.49174300  |
| C  | -2.32258700 | 2.15765700  | 1.73270300  |
| C  | -2.85478800 | 0.94434500  | 2.02197400  |
| H  | -2.58414400 | 3.14899600  | 2.06809800  |
| H  | -3.67565600 | 0.65960300  | 2.66131900  |
| N  | -1.27504000 | 1.93147200  | 0.84438800  |
| N  | -2.11833000 | 0.00763900  | 1.30388700  |
| C  | -1.12789600 | 0.59794800  | 0.56111900  |
| C  | -2.36444500 | -1.41462800 | 1.33983700  |
| C  | -3.29049100 | -1.96521900 | 0.43027800  |
| C  | -1.68036500 | -2.19590600 | 2.29362100  |
| C  | -3.51597400 | -3.34589400 | 0.49404700  |
| C  | -1.94301300 | -3.57126800 | 2.30986600  |
| C  | -2.84943400 | -4.14262200 | 1.42088900  |
| H  | -4.22117500 | -3.80214700 | -0.19461700 |
| H  | -1.42761200 | -4.20258700 | 3.02794000  |
| H  | -3.03675100 | -5.21269400 | 1.45027300  |
| C  | -0.44411900 | 2.97820200  | 0.29992200  |
| C  | -0.79336000 | 3.54411500  | -0.94242600 |

|   |             |             |             |
|---|-------------|-------------|-------------|
| C | 0.67668900  | 3.40496900  | 1.04033900  |
| C | 0.03684700  | 4.55179200  | -1.44974000 |
| C | 1.46684900  | 4.42158400  | 0.48927100  |
| C | 1.15620200  | 4.98643700  | -0.74497600 |
| H | -0.19960900 | 5.00327500  | -2.40907500 |
| H | 2.33793300  | 4.77363100  | 1.03458100  |
| H | 1.78562200  | 5.77107600  | -1.15655500 |
| C | -4.04758100 | -1.11959400 | -0.58939200 |
| C | -5.55822400 | -1.09750300 | -0.28101200 |
| C | -3.78082700 | -1.58748300 | -2.03278700 |
| H | -3.68418800 | -0.09044400 | -0.51341900 |
| H | -5.75656800 | -0.72105800 | 0.72923800  |
| H | -6.08390200 | -0.45112400 | -0.99370600 |
| H | -5.99618800 | -2.09988800 | -0.35423400 |
| H | -2.71101200 | -1.57074200 | -2.26427800 |
| H | -4.14705800 | -2.60677600 | -2.20229100 |
| H | -4.29539300 | -0.92914800 | -2.74297500 |
| C | -0.68606800 | -1.60265800 | 3.28709300  |
| C | 0.73086200  | -2.16913000 | 3.07393000  |
| C | -1.15606000 | -1.80376500 | 4.74139300  |
| H | -0.63111700 | -0.52457300 | 3.10966700  |
| H | 1.07813200  | -1.98454800 | 2.05223700  |
| H | 1.43650500  | -1.69594900 | 3.76712300  |
| H | 0.76348300  | -3.25046900 | 3.25194800  |
| H | -2.14824100 | -1.36797100 | 4.90653200  |
| H | -1.21139500 | -2.86666100 | 5.00390300  |
| H | -0.45518900 | -1.32673300 | 5.43650600  |
| C | -2.02345200 | 3.10641300  | -1.73225800 |
| C | -1.63133700 | 2.42350800  | -3.05665000 |
| C | -2.98806500 | 4.28402400  | -1.97459500 |
| H | -2.56260400 | 2.36430600  | -1.13609900 |
| H | -1.01744100 | 1.53645700  | -2.87016300 |
| H | -2.52854800 | 2.10696800  | -3.60186100 |
| H | -1.06733300 | 3.10240200  | -3.70744300 |
| H | -3.28946700 | 4.75580400  | -1.03229600 |
| H | -2.53390700 | 5.05787700  | -2.60423800 |
| H | -3.89310100 | 3.93315200  | -2.48413100 |
| C | 1.03475900  | 2.81955500  | 2.40344800  |
| C | 0.85204200  | 3.86740800  | 3.52017900  |
| C | 2.45676300  | 2.22847600  | 2.42570600  |
| H | 0.34424900  | 1.99693600  | 2.61093900  |
| H | -0.17201200 | 4.25786900  | 3.54114100  |
| H | 1.06640900  | 3.42362600  | 4.49953800  |
| H | 1.52923900  | 4.71885300  | 3.38395800  |
| H | 2.57291700  | 1.45183600  | 1.66358600  |
| H | 3.21912700  | 2.99657700  | 2.24962000  |
| H | 2.66269800  | 1.77916800  | 3.40437000  |

**CP2**

Energy (RB3LYP) = -1907.526205082677 A.U.

Free Energy = -1906.983525661697 A.U.

|    |             |             |             |
|----|-------------|-------------|-------------|
| Ni | -0.55967700 | -0.10792700 | -1.18961100 |
| C  | 3.61372600  | -1.10036700 | -0.95211900 |
| C  | 3.57161000  | 0.14309600  | -1.51104300 |
| C  | 2.23337700  | 0.65783900  | -1.57498100 |
| C  | 1.28728200  | -0.19994400 | -1.07608300 |
| S  | 2.03333100  | -1.67127400 | -0.49291900 |
| H  | 4.44615000  | 0.67380600  | -1.86977600 |
| H  | 1.99706300  | 1.62674700  | -2.00002400 |
| Br | -1.06835100 | -0.62200100 | -3.41245600 |
| Br | 5.19941100  | -2.18543400 | -0.65469600 |
| C  | -1.21766700 | 1.58934300  | 2.51559200  |
| C  | -2.01423600 | 0.49337000  | 2.56937500  |
| H  | -1.08207200 | 2.40540600  | 3.20662800  |
| H  | -2.71543300 | 0.15625500  | 3.31582500  |
| N  | -0.52017200 | 1.52728900  | 1.31463100  |
| N  | -1.79175500 | -0.21804800 | 1.39770300  |
| C  | -0.87642400 | 0.41697300  | 0.60536800  |
| C  | -2.51346100 | -1.42600500 | 1.04566500  |
| C  | -3.73989700 | -1.29736700 | 0.36118600  |
| C  | -1.98531500 | -2.67229300 | 1.44491200  |
| C  | -4.43856900 | -2.47576800 | 0.06958200  |
| C  | -2.73018100 | -3.81357700 | 1.12623000  |
| C  | -3.94115400 | -3.71903700 | 0.44504200  |
| H  | -5.38394700 | -2.41581500 | -0.46044100 |
| H  | -2.35578200 | -4.79100400 | 1.41163600  |
| H  | -4.49858900 | -4.62037700 | 0.20532700  |
| C  | 0.40901100  | 2.55942800  | 0.90183400  |
| C  | -0.01563400 | 3.52021000  | -0.03789400 |
| C  | 1.68318300  | 2.59251100  | 1.50645300  |
| C  | 0.90139000  | 4.51861200  | -0.39296500 |
| C  | 2.54915400  | 3.62312900  | 1.12337600  |
| C  | 2.16928000  | 4.57123400  | 0.17745900  |
| H  | 0.60981800  | 5.27212100  | -1.11847000 |
| H  | 3.53853700  | 3.67803500  | 1.56660600  |
| H  | 2.86162500  | 5.35769000  | -0.11077400 |
| C  | -4.34224400 | 0.05240700  | -0.02188100 |
| C  | -5.52728900 | 0.39951100  | 0.90354300  |
| C  | -4.76309500 | 0.11383400  | -1.50250300 |
| H  | -3.57875500 | 0.82330900  | 0.12635100  |
| H  | -5.22693300 | 0.41560300  | 1.95765200  |
| H  | -5.93325000 | 1.38602200  | 0.65105900  |
| H  | -6.33583700 | -0.33340600 | 0.79899700  |
| H  | -3.92748900 | -0.12846200 | -2.16659800 |
| H  | -5.58417000 | -0.57845800 | -1.72086800 |
| H  | -5.11468900 | 1.12330200  | -1.74610700 |
| C  | -0.68392600 | -2.79565800 | 2.23348400  |
| C  | 0.17036300  | -4.00090600 | 1.80115000  |
| C  | -0.96862700 | -2.85999700 | 3.74978500  |
| H  | -0.08788100 | -1.89668700 | 2.04397600  |

|   |             |             |             |
|---|-------------|-------------|-------------|
| H | 0.33241700  | -4.01283900 | 0.71933100  |
| H | 1.15014500  | -3.95238700 | 2.28856200  |
| H | -0.28912800 | -4.95341900 | 2.08960200  |
| H | -1.50880100 | -1.97469200 | 4.10279400  |
| H | -1.57400800 | -3.74076600 | 3.99505500  |
| H | -0.02994300 | -2.92776100 | 4.31201100  |
| C | -1.42329600 | 3.55697500  | -0.62772000 |
| C | -1.41659900 | 3.53221000  | -2.16788700 |
| C | -2.20135900 | 4.77841400  | -0.09525000 |
| H | -1.96009800 | 2.66335800  | -0.29581300 |
| H | -0.92156300 | 2.63493000  | -2.55259500 |
| H | -2.44510200 | 3.53348800  | -2.54670900 |
| H | -0.91032100 | 4.41015300  | -2.58553800 |
| H | -2.24689000 | 4.77984600  | 0.99996300  |
| H | -1.73261600 | 5.71791200  | -0.41032700 |
| H | -3.22818300 | 4.77225700  | -0.47912500 |
| C | 2.12636000  | 1.58488500  | 2.56503700  |
| C | 2.09050300  | 2.21747900  | 3.97270900  |
| C | 3.52027700  | 0.99680500  | 2.27946900  |
| H | 1.41994000  | 0.74881200  | 2.55553500  |
| H | 1.09489700  | 2.59606500  | 4.23053900  |
| H | 2.37743100  | 1.47925300  | 4.73067000  |
| H | 2.79056900  | 3.05851800  | 4.04109200  |
| H | 3.57627000  | 0.56994600  | 1.27510400  |
| H | 4.30837800  | 1.75302100  | 2.37435000  |
| H | 3.74306300  | 0.20400700  | 3.00272400  |

-----

**CP3**

Energy (RB3LYP) = -2446.696001181410 A.U.

Free Energy = -2446.103835579917 A.U.

-----

|    |             |             |             |
|----|-------------|-------------|-------------|
| Ni | -0.45577100 | -0.51479000 | -0.84088300 |
| C  | 3.76056300  | -1.30431200 | -0.29652400 |
| C  | 3.70122300  | -0.19480800 | -1.08690400 |
| C  | 2.34720500  | 0.19015900  | -1.36918400 |
| C  | 1.39750900  | -0.61218400 | -0.78224500 |
| S  | 2.17567500  | -1.90493300 | 0.10916200  |
| H  | 4.57454500  | 0.33395900  | -1.45204700 |
| H  | 2.10282300  | 1.04499500  | -1.99058100 |
| C  | -1.52331800 | 2.65646100  | 1.76342600  |
| C  | -2.35751600 | 1.66492500  | 2.16367200  |
| H  | -1.43147300 | 3.68238200  | 2.08271600  |
| H  | -3.14130200 | 1.64675200  | 2.90436300  |
| N  | -0.70813200 | 2.12041500  | 0.77215600  |
| N  | -2.02995500 | 0.54737000  | 1.40588800  |
| C  | -1.01028900 | 0.80945600  | 0.52926200  |
| C  | -2.69948000 | -0.72905600 | 1.52656100  |
| C  | -3.80610300 | -0.99608100 | 0.69346100  |
| C  | -2.24010400 | -1.64185100 | 2.49965600  |
| C  | -4.45491100 | -2.22649600 | 0.85861400  |
| C  | -2.92905600 | -2.85472300 | 2.61990300  |
| C  | -4.02338700 | -3.14642900 | 1.80952600  |

|   |             |             |             |
|---|-------------|-------------|-------------|
| H | -5.30998300 | -2.46505600 | 0.23346300  |
| H | -2.60364700 | -3.58073600 | 3.35857800  |
| H | -4.54213800 | -4.09485900 | 1.92061600  |
| C | 0.31369600  | 2.89396900  | 0.10168600  |
| C | 0.02330000  | 3.45774600  | -1.15624200 |
| C | 1.54508200  | 3.09125500  | 0.75970700  |
| C | 1.02732000  | 4.22053900  | -1.76739100 |
| C | 2.50449200  | 3.87540600  | 0.10852900  |
| C | 2.25433900  | 4.42882900  | -1.14431500 |
| H | 0.83930400  | 4.66422400  | -2.74084400 |
| H | 3.46428700  | 4.04679100  | 0.58625300  |
| H | 3.01708900  | 5.02764000  | -1.63495000 |
| C | -4.33088000 | 0.00551400  | -0.33210700 |
| C | -5.65276400 | 0.63834400  | 0.14925000  |
| C | -4.49406500 | -0.61869100 | -1.73137800 |
| H | -3.59817200 | 0.81340400  | -0.42435600 |
| H | -5.53071400 | 1.13746000  | 1.11740000  |
| H | -6.00667600 | 1.38226600  | -0.57411600 |
| H | -6.43614100 | -0.12049500 | 0.26145900  |
| H | -3.56462400 | -1.08654300 | -2.07218800 |
| H | -5.28103200 | -1.38162700 | -1.74680700 |
| H | -4.77561000 | 0.15541500  | -2.45473900 |
| C | -1.06871500 | -1.33326700 | 3.42823500  |
| C | -0.04212100 | -2.47900700 | 3.48898500  |
| C | -1.57504600 | -0.97629100 | 4.84161000  |
| H | -0.54478500 | -0.45761300 | 3.03311500  |
| H | 0.33491100  | -2.72981700 | 2.49311300  |
| H | 0.81306500  | -2.17909100 | 4.10509500  |
| H | -0.46488900 | -3.38631100 | 3.93572700  |
| H | -2.26099900 | -0.12163300 | 4.82209100  |
| H | -2.10845500 | -1.82071100 | 5.29417200  |
| H | -0.73362200 | -0.72014600 | 5.49594400  |
| C | -1.32756600 | 3.30053400  | -1.84855600 |
| C | -1.19564200 | 2.59845300  | -3.21318600 |
| C | -2.04037000 | 4.66085500  | -1.98920100 |
| H | -1.96147600 | 2.66732800  | -1.22074600 |
| H | -0.74300100 | 1.60725000  | -3.10756900 |
| H | -2.18369900 | 2.47169300  | -3.67134600 |
| H | -0.57973000 | 3.18013500  | -3.90894600 |
| H | -2.17055600 | 5.14777800  | -1.01591000 |
| H | -1.47529200 | 5.34618600  | -2.63152100 |
| H | -3.03166200 | 4.52615300  | -2.43775700 |
| C | 1.84404600  | 2.51394100  | 2.14093400  |
| C | 1.79566200  | 3.61792300  | 3.21807800  |
| C | 3.18785300  | 1.76426300  | 2.19074200  |
| H | 1.06347100  | 1.78453300  | 2.37841000  |
| H | 0.82399200  | 4.12482200  | 3.24101900  |
| H | 1.97802100  | 3.19131600  | 4.21145500  |
| H | 2.56230100  | 4.38005900  | 3.03447100  |
| H | 3.24168200  | 0.99071900  | 1.42033400  |
| H | 4.03795500  | 2.44274700  | 2.05216700  |
| H | 3.31031200  | 1.28638100  | 3.16968000  |
| C | -0.48458100 | -1.79666100 | -2.17606800 |

|    |             |             |             |
|----|-------------|-------------|-------------|
| C  | -1.07947900 | -3.04525400 | -2.08529600 |
| S  | -0.06753200 | -1.49020900 | -3.85030700 |
| C  | -1.24503300 | -3.71312500 | -3.33792700 |
| H  | -1.39215300 | -3.47983700 | -1.13984800 |
| C  | -0.74516400 | -2.99343000 | -4.39175800 |
| H  | -1.70842000 | -4.68923600 | -3.44661700 |
| H  | -0.73904500 | -3.26280500 | -5.44032100 |
| Br | 5.37409300  | -2.16586900 | 0.37185600  |

-----

**CP4**

Energy (RB3LYP) = -2446.724739909582 A.U.

Free Energy = -2446.131183911042 A.U.

-----

|    |             |             |             |
|----|-------------|-------------|-------------|
| Ni | -0.00861000 | -0.37104900 | -0.44683600 |
| C  | 0.31462100  | -2.02511700 | -1.43122600 |
| C  | 1.26567500  | -1.03116500 | -1.83818000 |
| C  | 2.58851400  | -1.27255200 | -1.29685700 |
| C  | 2.64895300  | -2.38612700 | -0.52631900 |
| S  | 1.13377300  | -3.24711100 | -0.37012700 |
| H  | 1.14266000  | -0.43252100 | -2.73878800 |
| H  | 3.43720500  | -0.62618600 | -1.48797200 |
| Br | 4.20578600  | -2.99104600 | 0.47698000  |
| C  | -1.56706000 | 2.56509100  | 2.03680400  |
| C  | -0.63541700 | 3.30831400  | 1.39179300  |
| H  | -2.27948600 | 2.82444900  | 2.80415900  |
| H  | -0.36908400 | 4.34996400  | 1.47980200  |
| N  | -1.47295600 | 1.27510500  | 1.52135800  |
| N  | 0.00669500  | 2.45512600  | 0.49758800  |
| C  | -0.49728800 | 1.17757000  | 0.55713600  |
| C  | 1.07464200  | 2.87196900  | -0.37714300 |
| C  | 2.39651400  | 2.85361000  | 0.11175100  |
| C  | 0.75539500  | 3.30328300  | -1.68030500 |
| C  | 3.41492700  | 3.26265700  | -0.75846000 |
| C  | 1.81352900  | 3.69394800  | -2.51066700 |
| C  | 3.13031400  | 3.67212400  | -2.05856400 |
| H  | 4.44455100  | 3.25937500  | -0.41198200 |
| H  | 1.60151100  | 4.02288000  | -3.52412200 |
| H  | 3.93623400  | 3.98138400  | -2.71904000 |
| C  | -2.30847500 | 0.17959700  | 1.94831000  |
| C  | -1.86306500 | -0.64368400 | 3.00259600  |
| C  | -3.55280800 | -0.01039600 | 1.31225100  |
| C  | -2.70504200 | -1.68650000 | 3.40938400  |
| C  | -4.35605700 | -1.06515300 | 1.76292900  |
| C  | -3.93829200 | -1.89708400 | 2.79859000  |
| H  | -2.38944100 | -2.34048300 | 4.21726200  |
| H  | -5.32123900 | -1.23675200 | 1.29516200  |
| H  | -4.57697800 | -2.71084900 | 3.13219200  |
| C  | 2.73993600  | 2.43281000  | 1.53775500  |
| C  | 3.25624000  | 3.63236800  | 2.35803800  |
| C  | 3.74261900  | 1.26475400  | 1.57265400  |
| H  | 1.82188600  | 2.07984100  | 2.01629800  |
| H  | 2.52611600  | 4.44979000  | 2.37783300  |

|   |             |             |             |
|---|-------------|-------------|-------------|
| H | 3.45578800  | 3.33015900  | 3.39294200  |
| H | 4.18888400  | 4.03012500  | 1.94061400  |
| H | 3.35627900  | 0.39842100  | 1.02764300  |
| H | 4.70748600  | 1.54300400  | 1.13228200  |
| H | 3.93005200  | 0.95947300  | 2.60890200  |
| C | -0.67806500 | 3.36149200  | -2.20002200 |
| C | -0.91190000 | 2.33741400  | -3.32687200 |
| C | -1.06052700 | 4.78544900  | -2.64912700 |
| H | -1.34679800 | 3.09112600  | -1.37760100 |
| H | -0.72426100 | 1.32030600  | -2.96836700 |
| H | -1.94920300 | 2.38833000  | -3.67928100 |
| H | -0.25703100 | 2.52814900  | -4.18570000 |
| H | -0.91829000 | 5.51223700  | -1.84108700 |
| H | -0.46061500 | 5.11693000  | -3.50463400 |
| H | -2.11349000 | 4.81645100  | -2.95299200 |
| C | -0.52906300 | -0.42667600 | 3.71022700  |
| C | 0.38262100  | -1.66384800 | 3.60635500  |
| C | -0.74125900 | -0.01118700 | 5.17987300  |
| H | -0.01058800 | 0.39581400  | 3.20932700  |
| H | 0.56474300  | -1.93134900 | 2.56055300  |
| H | 1.35014300  | -1.46022300 | 4.08040300  |
| H | -0.05565200 | -2.53413600 | 4.10921400  |
| H | -1.35238400 | 0.89565400  | 5.25635600  |
| H | -1.24393400 | -0.80046600 | 5.75132400  |
| H | 0.22285300  | 0.18706500  | 5.66288500  |
| C | -4.04660300 | 0.89692900  | 0.18927500  |
| C | -5.20926400 | 1.78791700  | 0.67187700  |
| C | -4.44298400 | 0.10278900  | -1.06908700 |
| H | -3.22281200 | 1.55718100  | -0.09675500 |
| H | -4.91631100 | 2.39969300  | 1.53293700  |
| H | -5.53286800 | 2.46302700  | -0.12929800 |
| H | -6.07456600 | 1.18458400  | 0.97150500  |
| H | -3.61806900 | -0.52547800 | -1.41830100 |
| H | -5.30793200 | -0.54577100 | -0.88585000 |
| H | -4.71623400 | 0.79256700  | -1.87654600 |
| C | -0.91083200 | -2.42586200 | -2.12063700 |
| C | -2.00229100 | -3.10153800 | -1.61466500 |
| S | -1.14932400 | -2.10096900 | -3.83207500 |
| C | -3.02369800 | -3.34202100 | -2.58005900 |
| H | -2.07201600 | -3.39888100 | -0.57358300 |
| C | -2.71732800 | -2.84719500 | -3.81824300 |
| H | -3.95400500 | -3.85313700 | -2.35536800 |
| H | -3.31498000 | -2.87197000 | -4.71958800 |

-----

**CP5**

Energy (RB3LYP) = -2446.722798783168 A.U.

Free Energy = -2446.129783765468 A.U.

-----

|    |             |             |             |
|----|-------------|-------------|-------------|
| Ni | -0.29007000 | -0.22044400 | -0.77092000 |
| C  | 4.62353700  | -0.73248800 | -0.57200600 |
| C  | 4.37076500  | 0.55144600  | -0.95837100 |
| C  | 3.07656600  | 0.68632200  | -1.54358500 |



|    |             |             |             |
|----|-------------|-------------|-------------|
| C  | 2.35649000  | -0.48844900 | -1.59860700 |
| S  | 3.30923600  | -1.81305600 | -0.92938500 |
| H  | 5.06761900  | 1.36999600  | -0.82318400 |
| H  | 2.67884800  | 1.63067200  | -1.89951400 |
| Br | 6.22499800  | -1.38008700 | 0.31450800  |
| C  | -3.13037500 | 0.61648400  | 2.14669000  |
| C  | -2.43824300 | 1.78126300  | 2.15772100  |
| H  | -3.98281200 | 0.28888500  | 2.72092600  |
| H  | -2.56294900 | 2.67912600  | 2.74258200  |
| N  | -2.52704000 | -0.19767200 | 1.19080000  |
| N  | -1.42730200 | 1.65200800  | 1.20892200  |
| C  | -1.45784100 | 0.42405400  | 0.58869700  |
| C  | -0.45653500 | 2.68115900  | 0.92934900  |
| C  | -0.74008800 | 3.62891500  | -0.07526300 |
| C  | 0.73107900  | 2.71544900  | 1.68861300  |
| C  | 0.21556800  | 4.62424400  | -0.31537600 |
| C  | 1.65148400  | 3.73251000  | 1.40638700  |
| C  | 1.40009100  | 4.67702100  | 0.41475100  |
| H  | 0.02735900  | 5.36825900  | -1.08426400 |
| H  | 2.57786100  | 3.78313900  | 1.97153600  |
| H  | 2.12788300  | 5.45858500  | 0.21238700  |
| C  | -2.97859700 | -1.53178500 | 0.88224900  |
| C  | -3.98831200 | -1.69902600 | -0.08692700 |
| C  | -2.41280200 | -2.61772500 | 1.58004200  |
| C  | -4.41479900 | -3.00469300 | -0.36039300 |
| C  | -2.86951900 | -3.90257500 | 1.26007900  |
| C  | -3.85852400 | -4.09739800 | 0.29962900  |
| H  | -5.19316400 | -3.16669800 | -1.10072700 |
| H  | -2.44624900 | -4.76132500 | 1.77349700  |
| H  | -4.20095200 | -5.10291000 | 0.06917000  |
| C  | -2.03535500 | 3.61161700  | -0.88105000 |
| C  | -2.89084000 | 4.86024400  | -0.58754900 |
| C  | -1.76672300 | 3.46109100  | -2.39033100 |
| H  | -2.61477400 | 2.73759800  | -0.57016500 |
| H  | -3.12124900 | 4.94636000  | 0.48065000  |
| H  | -3.83868400 | 4.81099600  | -1.13656800 |
| H  | -2.37703100 | 5.77969200  | -0.89217400 |
| H  | -1.19604400 | 2.55003100  | -2.59803000 |
| H  | -1.20478300 | 4.31424600  | -2.78883400 |
| H  | -2.71502900 | 3.40450600  | -2.93844000 |
| C  | 1.03523600  | 1.70154200  | 2.78718600  |
| C  | 2.29886000  | 0.88097500  | 2.46678900  |
| C  | 1.14516400  | 2.38290700  | 4.16559300  |
| H  | 0.19998800  | 0.99720700  | 2.83778700  |
| H  | 2.19857700  | 0.36742000  | 1.50578600  |
| H  | 2.46781300  | 0.12708000  | 3.24501300  |
| H  | 3.19202700  | 1.51474100  | 2.41952400  |
| H  | 0.23106000  | 2.93420600  | 4.41495400  |
| H  | 1.98092300  | 3.09167800  | 4.19922400  |
| H  | 1.31416500  | 1.63354300  | 4.94787600  |
| C  | -4.63364800 | -0.52132200 | -0.81133500 |
| C  | -4.53981800 | -0.65766800 | -2.34240100 |
| C  | -6.09618300 | -0.33120600 | -0.36037500 |

|   |             |             |             |
|---|-------------|-------------|-------------|
| H | -4.08477300 | 0.38434300  | -0.53807600 |
| H | -3.49869300 | -0.76336000 | -2.66258800 |
| H | -4.96000500 | 0.23298900  | -2.82499100 |
| H | -5.10145200 | -1.52528100 | -2.70906800 |
| H | -6.16590300 | -0.17995000 | 0.72300500  |
| H | -6.70819900 | -1.20508700 | -0.61384400 |
| H | -6.53901800 | 0.54211300  | -0.85392200 |
| C | -1.34054600 | -2.43854900 | 2.65071400  |
| C | -1.77689800 | -3.04101700 | 4.00043400  |
| C | 0.01281700  | -3.01436200 | 2.19180500  |
| H | -1.19545700 | -1.36564500 | 2.80716000  |
| H | -2.72873500 | -2.61656700 | 4.33992200  |
| H | -1.02071700 | -2.83703000 | 4.76756200  |
| H | -1.89970500 | -4.12864900 | 3.94031200  |
| H | 0.35363900  | -2.51226900 | 1.28086700  |
| H | -0.05628500 | -4.09011300 | 1.98975800  |
| H | 0.77355900  | -2.86736300 | 2.96785900  |
| C | 1.02015300  | -0.72231500 | -2.13953100 |
| C | 0.14995900  | -1.83190700 | -1.88397900 |
| S | 0.57805100  | 0.03519200  | -3.71795600 |
| C | -0.81171600 | -2.02477700 | -2.94893300 |
| H | 0.41328000  | -2.64795800 | -1.21406500 |
| C | -0.71062800 | -1.12396100 | -3.96181900 |
| H | -1.55218400 | -2.81818100 | -2.93179500 |
| H | -1.34758500 | -1.03417700 | -4.83309900 |

-----

**CP6**

Energy (RB3LYP) = -2446.734565144036A.U.

Free Energy = -2446.141653568827 A.U.

-----

|    |             |             |             |
|----|-------------|-------------|-------------|
| Ni | 0.10644600  | -0.21125000 | -0.69683000 |
| C  | -3.33631700 | -0.35180400 | -1.06247600 |
| C  | -2.63966900 | 0.79232500  | -1.35754300 |
| C  | -1.33427500 | 0.58048200  | -1.92813800 |
| C  | -1.02587500 | -0.81045500 | -2.04545100 |
| S  | -2.39562800 | -1.80277500 | -1.46020300 |
| H  | -3.06032400 | 1.78316500  | -1.21314200 |
| H  | -0.84978200 | 1.34616700  | -2.52658900 |
| Br | -0.01980700 | -1.55869700 | -3.66074800 |
| C  | 2.90330900  | 0.26661700  | 2.34971500  |
| C  | 2.71794200  | 1.57300400  | 2.03671200  |
| H  | 3.54479800  | -0.20885000 | 3.07503400  |
| H  | 3.16442300  | 2.47129300  | 2.43350900  |
| N  | 2.05999200  | -0.46343800 | 1.51838100  |
| N  | 1.76687800  | 1.60789900  | 1.02106100  |
| C  | 1.34041500  | 0.34963400  | 0.67929100  |
| C  | 1.28326900  | 2.82626300  | 0.41792200  |
| C  | 1.90648100  | 3.29783300  | -0.75460500 |
| C  | 0.21574500  | 3.50776000  | 1.03614200  |
| C  | 1.41066900  | 4.47980100  | -1.31950300 |
| C  | -0.23571500 | 4.68762400  | 0.43163000  |
| C  | 0.35006400  | 5.16810500  | -0.73652300 |

|   |             |             |             |
|---|-------------|-------------|-------------|
| H | 1.86385200  | 4.86610200  | -2.22806100 |
| H | -1.05897000 | 5.23513200  | 0.88185800  |
| H | -0.01836700 | 6.08370500  | -1.19170400 |
| C | 1.94896300  | -1.90264900 | 1.54612300  |
| C | 2.82951200  | -2.66638000 | 0.75298700  |
| C | 0.97551800  | -2.48973000 | 2.38011900  |
| C | 2.70757500  | -4.06030500 | 0.81092100  |
| C | 0.89585500  | -3.88762500 | 2.39499800  |
| C | 1.75070600  | -4.66668000 | 1.62006400  |
| H | 3.36950600  | -4.67778700 | 0.21067000  |
| H | 0.15159000  | -4.37116000 | 3.02122200  |
| H | 1.67060500  | -5.75018100 | 1.64641000  |
| C | 3.08210000  | 2.57982200  | -1.41052000 |
| C | 4.32955400  | 3.48306400  | -1.47526200 |
| C | 2.70873400  | 2.04119800  | -2.80489700 |
| H | 3.33963400  | 1.71570000  | -0.79103100 |
| H | 4.61482500  | 3.84487500  | -0.48068700 |
| H | 5.17815300  | 2.92761000  | -1.89150200 |
| H | 4.16316200  | 4.35887800  | -2.11319100 |
| H | 1.87328400  | 1.33671300  | -2.74002000 |
| H | 2.42347300  | 2.85177500  | -3.48614900 |
| H | 3.56179900  | 1.51564500  | -3.25044100 |
| C | -0.44284200 | 3.01490700  | 2.32142800  |
| C | -1.93960900 | 2.71303700  | 2.11848800  |
| C | -0.22799100 | 4.01257300  | 3.47717700  |
| H | 0.03628300  | 2.07481700  | 2.60969300  |
| H | -2.08591300 | 1.96428800  | 1.33387500  |
| H | -2.37700000 | 2.32536600  | 3.04614500  |
| H | -2.49974600 | 3.61356000  | 1.83977000  |
| H | 0.83770500  | 4.19887500  | 3.65380100  |
| H | -0.70373500 | 4.97796700  | 3.26822400  |
| H | -0.66279100 | 3.62118900  | 4.40443800  |
| C | 3.89844000  | -2.03470500 | -0.13381300 |
| C | 3.74593800  | -2.45584800 | -1.60774400 |
| C | 5.31295700  | -2.35195800 | 0.39202800  |
| H | 3.77185300  | -0.94861200 | -0.09610800 |
| H | 2.75343900  | -2.20147200 | -1.99314300 |
| H | 4.49392700  | -1.94307300 | -2.22427400 |
| H | 3.89387000  | -3.53416300 | -1.73884800 |
| H | 5.44337100  | -2.01090100 | 1.42565600  |
| H | 5.51489200  | -3.42938100 | 0.36954500  |
| H | 6.07070300  | -1.85727100 | -0.22704600 |
| C | 0.02753600  | -1.66766600 | 3.24781100  |
| C | 0.22938300  | -1.97102300 | 4.74560300  |
| C | -1.44095300 | -1.87141300 | 2.82830300  |
| H | 0.26046500  | -0.60962200 | 3.09651300  |
| H | 1.26522500  | -1.79060000 | 5.05566300  |
| H | -0.42346700 | -1.33365500 | 5.35354500  |
| H | -0.01211300 | -3.01385000 | 4.98218100  |
| H | -1.58742600 | -1.61152800 | 1.77510200  |
| H | -1.75890200 | -2.91147000 | 2.96753000  |
| H | -2.09964800 | -1.23752300 | 3.43389900  |
| C | -4.64709900 | -0.48278000 | -0.45968900 |

|   |             |             |             |
|---|-------------|-------------|-------------|
| C | -5.50230400 | -1.56526300 | -0.47416200 |
| S | -5.37191000 | 0.84229100  | 0.44052800  |
| C | -6.72876000 | -1.33366500 | 0.21152300  |
| H | -5.26246700 | -2.49216400 | -0.98403800 |
| C | -6.81058300 | -0.07846600 | 0.74959400  |
| H | -7.52106700 | -2.07029300 | 0.29137800  |
| H | -7.62589000 | 0.36286000  | 1.30694500  |

-----

**CP7**

Energy (RB3LYP) = -2446.725997535359 A.U.

Free Energy = -2446.134309075778 A.U.

-----

|    |             |             |             |
|----|-------------|-------------|-------------|
| Ni | 0.95199500  | -0.21609800 | -1.06990500 |
| C  | -2.23009000 | -0.95480300 | -1.66173400 |
| C  | -1.65827300 | 0.21757500  | -2.09168200 |
| C  | -0.32093400 | 0.08523500  | -2.60785800 |
| C  | 0.16214600  | -1.25066800 | -2.50752600 |
| S  | -1.12053100 | -2.31905400 | -1.86806800 |
| H  | -2.17480000 | 1.17210000  | -2.04604000 |
| H  | 0.10945700  | 0.83383800  | -3.26853800 |
| C  | 3.69990700  | 0.46033000  | 1.97023600  |
| C  | 3.03249100  | 1.63815200  | 2.02945300  |
| H  | 4.53762100  | 0.08616100  | 2.53775500  |
| H  | 3.16780700  | 2.50311000  | 2.65984500  |
| N  | 3.09464000  | -0.28964200 | 0.96474200  |
| N  | 2.03406900  | 1.58009700  | 1.05962700  |
| C  | 2.05035900  | 0.38627800  | 0.37813600  |
| C  | 1.09382700  | 2.64611900  | 0.81565800  |
| C  | 1.42848300  | 3.64599900  | -0.11959300 |
| C  | -0.11821900 | 2.65775700  | 1.53459000  |
| C  | 0.49400700  | 4.66512100  | -0.34148200 |
| C  | -1.01632300 | 3.70037500  | 1.27369200  |
| C  | -0.71787000 | 4.69261900  | 0.34383200  |
| H  | 0.71838100  | 5.44635700  | -1.06230600 |
| H  | -1.96349400 | 3.73220200  | 1.80459200  |
| H  | -1.43024100 | 5.49151900  | 0.15507900  |
| C  | 3.51831100  | -1.61592400 | 0.58850400  |
| C  | 4.47730100  | -1.75728900 | -0.43539300 |
| C  | 2.97222800  | -2.72183800 | 1.27085200  |
| C  | 4.87206200  | -3.05612500 | -0.77892500 |
| C  | 3.40730100  | -3.99769400 | 0.89065200  |
| C  | 4.34418300  | -4.16643600 | -0.12502400 |
| H  | 5.60282500  | -3.19924300 | -1.56989000 |
| H  | 3.00285400  | -4.87022500 | 1.39585200  |
| H  | 4.66536900  | -5.16580100 | -0.40683000 |
| C  | 2.74430800  | 3.64056400  | -0.89188900 |
| C  | 3.53548800  | 4.94715500  | -0.68989100 |
| C  | 2.50807600  | 3.35335400  | -2.38742000 |
| H  | 3.36120400  | 2.82506200  | -0.50301700 |
| H  | 3.72338000  | 5.14135800  | 0.37230300  |
| H  | 4.50367800  | 4.88636100  | -1.20076400 |
| H  | 3.00221500  | 5.81374500  | -1.09756000 |

|    |             |             |             |
|----|-------------|-------------|-------------|
| H  | 2.01282200  | 2.38525300  | -2.51566800 |
| H  | 1.88147700  | 4.12586800  | -2.84926400 |
| H  | 3.46237300  | 3.32753900  | -2.92764900 |
| C  | -0.47758900 | 1.58526700  | 2.55817100  |
| C  | -1.67230800 | 0.73694200  | 2.08193100  |
| C  | -0.73972500 | 2.19173000  | 3.95048100  |
| H  | 0.37789500  | 0.91035100  | 2.65496900  |
| H  | -1.45489500 | 0.26518800  | 1.11862600  |
| H  | -1.89293800 | -0.05237500 | 2.81063500  |
| H  | -2.57680200 | 1.34564700  | 1.96558200  |
| H  | 0.12021600  | 2.77240800  | 4.30401600  |
| H  | -1.61155200 | 2.85619200  | 3.94618500  |
| H  | -0.93549000 | 1.39617000  | 4.67900500  |
| C  | 5.07088000  | -0.56224900 | -1.17513300 |
| C  | 4.57628900  | -0.51392300 | -2.63413900 |
| C  | 6.60981300  | -0.54622400 | -1.10326000 |
| H  | 4.71434500  | 0.34894500  | -0.68586500 |
| H  | 3.48307100  | -0.44561100 | -2.66355500 |
| H  | 4.99116900  | 0.36089900  | -3.14967000 |
| H  | 4.88222600  | -1.40848900 | -3.19002300 |
| H  | 6.96260500  | -0.56090400 | -0.06566400 |
| H  | 7.05139500  | -1.40756900 | -1.61765800 |
| H  | 7.00118700  | 0.35882000  | -1.58255500 |
| C  | 1.94530600  | -2.57372600 | 2.38928600  |
| C  | 2.50593700  | -3.07568900 | 3.73475200  |
| C  | 0.61969700  | -3.27655100 | 2.03943200  |
| H  | 1.72244900  | -1.50918400 | 2.50515900  |
| H  | 3.42659500  | -2.54713500 | 4.00801000  |
| H  | 1.77361100  | -2.91832200 | 4.53542000  |
| H  | 2.73551900  | -4.14723600 | 3.69996500  |
| H  | 0.20430400  | -2.88692600 | 1.10441200  |
| H  | 0.75371300  | -4.35916500 | 1.92770100  |
| H  | -0.11561400 | -3.11375200 | 2.83666600  |
| C  | -3.53396500 | -1.15933800 | -1.06843400 |
| C  | -4.05283200 | -2.29345600 | -0.47931100 |
| S  | -4.73380600 | 0.13348100  | -1.05176300 |
| C  | -5.39029600 | -2.14841300 | -0.00713800 |
| H  | -3.48530400 | -3.21210300 | -0.37831600 |
| C  | -5.87903200 | -0.89752100 | -0.24470700 |
| H  | -5.95247500 | -2.93268300 | 0.48523300  |
| H  | 0.88573700  | -1.72246300 | -3.16766700 |
| Br | -7.63705600 | -0.22958300 | 0.22716600  |

-----

**TS1**

Energy (RB3LYP) = -1907.476141663962 A.U.

Free Energy = -1906.936865315967 A.U.

-----

|    |            |             |             |
|----|------------|-------------|-------------|
| Ni | 0.20898800 | -0.09911000 | -0.60173700 |
| C  | 3.95951700 | 0.01241800  | -0.61082000 |
| C  | 3.31906100 | 1.20572100  | -0.75093200 |
| C  | 2.02135000 | 1.06097500  | -1.35443700 |
| C  | 1.69666300 | -0.28727300 | -1.61266400 |

|    |             |             |             |
|----|-------------|-------------|-------------|
| S  | 3.02966500  | -1.36638200 | -1.15500500 |
| H  | 3.75756300  | 2.15771500  | -0.47401600 |
| H  | 1.47941300  | 1.89720100  | -1.78091000 |
| Br | 0.51573600  | -0.86275200 | -3.35710300 |
| Br | 5.71974300  | -0.25053400 | 0.16957000  |
| C  | -2.97842700 | 1.11605800  | 1.80785300  |
| C  | -3.08157500 | -0.22846100 | 1.94975000  |
| H  | -3.56126000 | 1.92343800  | 2.22267400  |
| H  | -3.77138100 | -0.83486100 | 2.51542600  |
| N  | -1.89832300 | 1.34464200  | 0.96016300  |
| N  | -2.06332800 | -0.78765500 | 1.18389800  |
| C  | -1.30968300 | 0.17260800  | 0.55812700  |
| C  | -1.82160100 | -2.20710900 | 1.07876100  |
| C  | -2.51760900 | -2.94298400 | 0.09753700  |
| C  | -0.91534900 | -2.80699100 | 1.97696600  |
| C  | -2.27543100 | -4.32060000 | 0.03085900  |
| C  | -0.70733600 | -4.18691800 | 1.85980800  |
| C  | -1.37820800 | -4.93758600 | 0.89845300  |
| H  | -2.79476400 | -4.91696700 | -0.71344300 |
| H  | -0.00992300 | -4.67872800 | 2.53186200  |
| H  | -1.20189700 | -6.00745100 | 0.82532000  |
| C  | -1.44679100 | 2.66012900  | 0.57544500  |
| C  | -1.95960500 | 3.23697700  | -0.60361600 |
| C  | -0.52366500 | 3.32694900  | 1.40648200  |
| C  | -1.50727000 | 4.51763400  | -0.94682400 |
| C  | -0.10870100 | 4.60642500  | 1.01689700  |
| C  | -0.59114000 | 5.19677700  | -0.14828300 |
| H  | -1.88042800 | 4.98849000  | -1.85183200 |
| H  | 0.60333300  | 5.14614900  | 1.63486200  |
| H  | -0.25436200 | 6.19007200  | -0.43321400 |
| C  | -3.52575800 | -2.30077900 | -0.85099300 |
| C  | -4.96576600 | -2.71093900 | -0.47984000 |
| C  | -3.22420600 | -2.61818200 | -2.32760300 |
| H  | -3.45366200 | -1.21499500 | -0.73624100 |
| H  | -5.20897800 | -2.43802400 | 0.55361000  |
| H  | -5.68737900 | -2.21564500 | -1.14024000 |
| H  | -5.10776300 | -3.79359700 | -0.57989400 |
| H  | -2.20997900 | -2.31024600 | -2.60032200 |
| H  | -3.32627100 | -3.68803600 | -2.54389300 |
| H  | -3.92954300 | -2.08453000 | -2.97566500 |
| C  | -0.17609500 | -2.01923000 | 3.05437000  |
| C  | 1.34857800  | -2.05526300 | 2.83608600  |
| C  | -0.55030100 | -2.51129100 | 4.46657300  |
| H  | -0.48611000 | -0.97262900 | 2.98282200  |
| H  | 1.61279400  | -1.65785600 | 1.85074300  |
| H  | 1.85522400  | -1.45005400 | 3.59736300  |
| H  | 1.74209100  | -3.07619700 | 2.90574900  |
| H  | -1.63125500 | -2.45231200 | 4.63846500  |
| H  | -0.24412000 | -3.55179000 | 4.62562100  |
| H  | -0.05116100 | -1.89903200 | 5.22685100  |
| C  | -2.97967800 | 2.53169400  | -1.49221700 |
| C  | -2.43326600 | 2.29892900  | -2.91368000 |
| C  | -4.31552000 | 3.30091300  | -1.52618100 |

|   |             |            |             |
|---|-------------|------------|-------------|
| H | -3.18208700 | 1.54688400 | -1.06117700 |
| H | -1.51836000 | 1.69847100 | -2.89127200 |
| H | -3.17360300 | 1.76382900 | -3.52008600 |
| H | -2.21059500 | 3.24514600 | -3.42101100 |
| H | -4.72725500 | 3.43455700 | -0.51911900 |
| H | -4.19594400 | 4.29555400 | -1.97152500 |
| H | -5.05355500 | 2.75504200 | -2.12554600 |
| C | 0.01940200  | 2.71414500 | 2.69409300  |
| C | -0.42741100 | 3.52185500 | 3.92901700  |
| C | 1.55187500  | 2.56214700 | 2.65263400  |
| H | -0.39859200 | 1.70833900 | 2.79387100  |
| H | -1.51955700 | 3.59538500 | 3.98654400  |
| H | -0.07034800 | 3.04233900 | 4.84803400  |
| H | -0.02628500 | 4.54197300 | 3.90839800  |
| H | 1.86184300  | 1.94983600 | 1.80005600  |
| H | 2.05261500  | 3.53464700 | 2.57546100  |
| H | 1.90872700  | 2.07871700 | 3.56989600  |

-----

**TS2**

Energy (RB3LYP) = -2446.687270723211 A.U.

Free Energy = -2446.094811317539 A.U.

-----

|    |             |             |             |
|----|-------------|-------------|-------------|
| Ni | 0.05878500  | -0.13237300 | 0.82222700  |
| C  | -4.16984100 | -0.14093600 | 0.53950300  |
| C  | -3.90312800 | 0.99756600  | 1.24481100  |
| C  | -2.53606500 | 1.07174200  | 1.64854100  |
| C  | -1.74718700 | 0.00842000  | 1.23294800  |
| S  | -2.75795100 | -1.14008700 | 0.33361600  |
| H  | -4.64894300 | 1.74834900  | 1.48006500  |
| H  | -2.14921600 | 1.87738200  | 2.26256900  |
| C  | 2.57377900  | 1.26820600  | -2.24248500 |
| C  | 2.83962400  | -0.06028400 | -2.31906700 |
| H  | 2.96365600  | 2.10608100  | -2.79875500 |
| H  | 3.50974800  | -0.61730300 | -2.95469300 |
| N  | 1.62849600  | 1.42645100  | -1.23658800 |
| N  | 2.04351200  | -0.67913100 | -1.36321800 |
| C  | 1.28041100  | 0.22707900  | -0.67323300 |
| C  | 2.03263900  | -2.10776200 | -1.14469100 |
| C  | 2.84060800  | -2.64620000 | -0.12257400 |
| C  | 1.24262700  | -2.91146600 | -1.99241000 |
| C  | 2.83395000  | -4.03740000 | 0.03868300  |
| C  | 1.27775700  | -4.29607200 | -1.78645300 |
| C  | 2.06229300  | -4.85540200 | -0.78158600 |
| H  | 3.44462500  | -4.48480300 | 0.81731100  |
| H  | 0.68134300  | -4.94404800 | -2.42190600 |
| H  | 2.07343000  | -5.93269400 | -0.63849200 |
| C  | 1.10092100  | 2.71316500  | -0.84301100 |
| C  | 1.81383200  | 3.47090300  | 0.10732800  |
| C  | -0.08064200 | 3.17711900  | -1.45621900 |
| C  | 1.30250100  | 4.73070900  | 0.44370900  |
| C  | -0.54373000 | 4.44483600  | -1.08350900 |
| C  | 0.13684300  | 5.21424200  | -0.14341400 |

|    |             |             |             |
|----|-------------|-------------|-------------|
| H  | 1.82662700  | 5.34026900  | 1.17420200  |
| H  | -1.45067100 | 4.83393600  | -1.53608600 |
| H  | -0.24231700 | 6.19507000  | 0.13126600  |
| C  | 3.73106600  | -1.78551600 | 0.76889500  |
| C  | 5.21855800  | -1.98949400 | 0.41532300  |
| C  | 3.47632600  | -2.03854700 | 2.26676700  |
| H  | 3.48944000  | -0.73598900 | 0.57811800  |
| H  | 5.41704000  | -1.75683200 | -0.63738300 |
| H  | 5.85092600  | -1.33965700 | 1.03183500  |
| H  | 5.53057900  | -3.02575700 | 0.59189300  |
| H  | 2.42327100  | -1.88427600 | 2.52158700  |
| H  | 3.75310700  | -3.05823400 | 2.55973200  |
| H  | 4.07925300  | -1.34912200 | 2.86944700  |
| C  | 0.39410700  | -2.33309200 | -3.12184300 |
| C  | -1.07022200 | -2.80532200 | -3.05736600 |
| C  | 1.01539900  | -2.65796300 | -4.49612700 |
| H  | 0.38267400  | -1.24425900 | -3.01454200 |
| H  | -1.52732200 | -2.55042300 | -2.09662700 |
| H  | -1.65406000 | -2.32103600 | -3.84888800 |
| H  | -1.15764500 | -3.88838500 | -3.20180400 |
| H  | 2.04069600  | -2.27861700 | -4.57612600 |
| H  | 1.04770600  | -3.74012400 | -4.66989000 |
| H  | 0.42326700  | -2.20634100 | -5.30076300 |
| C  | 3.11085800  | 2.98444200  | 0.74775300  |
| C  | 3.02023600  | 2.95044100  | 2.28490300  |
| C  | 4.31004600  | 3.83496800  | 0.28173500  |
| H  | 3.29063200  | 1.95763000  | 0.41556300  |
| H  | 2.19843800  | 2.30925500  | 2.61864200  |
| H  | 3.95228000  | 2.55675400  | 2.70782400  |
| H  | 2.86439900  | 3.95093000  | 2.70503000  |
| H  | 4.40979800  | 3.82491100  | -0.80984300 |
| H  | 4.20390000  | 4.88005100  | 0.59570200  |
| H  | 5.24237900  | 3.44982400  | 0.71134100  |
| C  | -0.82329100 | 2.37273400  | -2.51902900 |
| C  | -0.53786900 | 2.93859700  | -3.92582700 |
| C  | -2.33722700 | 2.29440900  | -2.25281500 |
| H  | -0.44412600 | 1.34708600  | -2.49079600 |
| H  | 0.53483400  | 2.93755500  | -4.15189200 |
| H  | -1.04580100 | 2.33877500  | -4.69033500 |
| H  | -0.89629800 | 3.97113900  | -4.01568200 |
| H  | -2.54400000 | 1.90298300  | -1.25264600 |
| H  | -2.82090500 | 3.27415600  | -2.34540600 |
| H  | -2.80933200 | 1.62865900  | -2.98437700 |
| C  | -0.48990900 | -0.69287000 | 2.49516200  |
| C  | -0.67965700 | -1.97313800 | 2.99532400  |
| S  | 0.08106000  | 0.35593600  | 3.80380100  |
| C  | -0.33988700 | -2.11814800 | 4.37218300  |
| H  | -1.08093400 | -2.77965900 | 2.39162700  |
| C  | 0.08090900  | -0.95052800 | 4.95164600  |
| H  | -0.41808200 | -3.05638500 | 4.91271300  |
| H  | 0.39414200  | -0.78463000 | 5.97436400  |
| Br | -5.89366100 | -0.66363500 | -0.19650400 |

-----

**TS3**

Energy (RB3LYP) = -2446.709505803522 A.U.

Free Energy = -2446.115614890211 A.U.

|    |             |             |             |
|----|-------------|-------------|-------------|
| Ni | -0.18541900 | 0.18555800  | -0.80168600 |
| C  | 1.75028200  | 0.69398000  | -2.03525000 |
| C  | 0.52789900  | 0.39608400  | -2.67767300 |
| C  | -0.46134400 | 1.42006200  | -2.49591400 |
| C  | 0.02028000  | 2.46274400  | -1.71627900 |
| S  | 1.74453800  | 2.36058300  | -1.40851700 |
| H  | 0.39040600  | -0.47017300 | -3.31648700 |
| H  | -1.45070500 | 1.41111500  | -2.93691500 |
| Br | -0.90658900 | 4.14697800  | -1.40947400 |
| C  | -0.85317700 | -1.35950200 | 2.99521800  |
| C  | -1.96165900 | -1.78004000 | 2.34155200  |
| H  | -0.53038500 | -1.50587300 | 4.01394100  |
| H  | -2.80735800 | -2.36162500 | 2.67393300  |
| N  | -0.09044500 | -0.64017300 | 2.07530500  |
| N  | -1.85718300 | -1.30719100 | 1.03605400  |
| C  | -0.69366000 | -0.59010000 | 0.83456500  |
| C  | -2.84245600 | -1.55416000 | 0.01526400  |
| C  | -3.93767900 | -0.67396200 | -0.10018000 |
| C  | -2.69308600 | -2.68390000 | -0.81583900 |
| C  | -4.88304700 | -0.93899900 | -1.09899400 |
| C  | -3.66468100 | -2.89875300 | -1.80139800 |
| C  | -4.74773800 | -2.03555800 | -1.94632700 |
| H  | -5.73634300 | -0.27629500 | -1.21374300 |
| H  | -3.57253700 | -3.75656700 | -2.46180400 |
| H  | -5.49158900 | -2.22194400 | -2.71669600 |
| C  | 1.21816100  | -0.12009900 | 2.38477600  |
| C  | 1.35061900  | 1.23498100  | 2.75626100  |
| C  | 2.31486200  | -1.00483500 | 2.35030700  |
| C  | 2.63038600  | 1.69023200  | 3.09443500  |
| C  | 3.57254700  | -0.49632000 | 2.70128400  |
| C  | 3.73120200  | 0.83598100  | 3.06900400  |
| H  | 2.76991300  | 2.72695500  | 3.38272200  |
| H  | 4.43635200  | -1.15494300 | 2.68572200  |
| H  | 4.71475600  | 1.21193600  | 3.33938700  |
| C  | -4.12200500 | 0.53000500  | 0.81793600  |
| C  | -5.39852600 | 0.39374300  | 1.67136800  |
| C  | -4.11702300 | 1.85136100  | 0.02735400  |
| H  | -3.27133100 | 0.56472700  | 1.50425700  |
| H  | -5.38672100 | -0.52708600 | 2.26592000  |
| H  | -5.48849400 | 1.24169000  | 2.36062300  |
| H  | -6.30014500 | 0.37515600  | 1.04764300  |
| H  | -3.18148900 | 1.96652200  | -0.52809900 |
| H  | -4.94930400 | 1.90108800  | -0.68502000 |
| H  | -4.21285500 | 2.70359900  | 0.71061600  |
| C  | -1.53022300 | -3.66111100 | -0.67278700 |
| C  | -0.60422100 | -3.61827100 | -1.90313400 |
| C  | -2.02409200 | -5.09393100 | -0.39278900 |
| H  | -0.93177500 | -3.34934800 | 0.18785600  |

|   |             |             |             |
|---|-------------|-------------|-------------|
| H | -0.19700400 | -2.61067600 | -2.03683500 |
| H | 0.23555700  | -4.31154600 | -1.77401600 |
| H | -1.13704400 | -3.90260000 | -2.81872700 |
| H | -2.66039500 | -5.13084800 | 0.49889800  |
| H | -2.60361900 | -5.49575800 | -1.23220000 |
| H | -1.17143900 | -5.76367700 | -0.22979500 |
| C | 0.14284400  | 2.16509200  | 2.83668500  |
| C | 0.46717400  | 3.61949900  | 2.45700900  |
| C | -0.49600400 | 2.10951100  | 4.24107900  |
| H | -0.59633600 | 1.80398400  | 2.11488200  |
| H | 0.97218800  | 3.67578800  | 1.48788800  |
| H | -0.46005600 | 4.19883300  | 2.38773600  |
| H | 1.10106000  | 4.11091400  | 3.20507700  |
| H | -0.81556600 | 1.09512600  | 4.50213900  |
| H | 0.21448300  | 2.44667900  | 5.00592500  |
| H | -1.37647300 | 2.76184800  | 4.28731000  |
| C | 2.17199600  | -2.47769700 | 1.97574800  |
| C | 2.41006800  | -3.38515900 | 3.19989900  |
| C | 3.09350700  | -2.87485900 | 0.80816800  |
| H | 1.14443500  | -2.64228100 | 1.63988900  |
| H | 1.72071900  | -3.14713400 | 4.01813300  |
| H | 2.26524200  | -4.43821100 | 2.93031800  |
| H | 3.43138100  | -3.27574300 | 3.58392300  |
| H | 2.91235600  | -2.24703300 | -0.06868700 |
| H | 4.15297400  | -2.78303300 | 1.07425200  |
| H | 2.91416400  | -3.92015000 | 0.52856700  |
| C | 3.00133600  | -0.03231300 | -2.09280000 |
| C | 4.14513800  | 0.15006300  | -1.34090200 |
| S | 3.25565800  | -1.31113600 | -3.27391000 |
| C | 5.20859700  | -0.72657800 | -1.70045400 |
| H | 4.20549800  | 0.87099500  | -0.53285900 |
| C | 4.87998800  | -1.57983400 | -2.71755900 |
| H | 6.17683400  | -0.72715900 | -1.21113800 |
| H | 5.48566000  | -2.35085200 | -3.17418600 |

**TS4**

Energy (RB3LYP) = -2446.719049105191 A.U.

Free Energy = -2446.123221742965 A.U.

|    |             |             |             |
|----|-------------|-------------|-------------|
| Ni | 0.14337800  | -0.21233200 | 0.87798900  |
| C  | -3.81458200 | -1.07968900 | 0.82936700  |
| C  | -3.55745500 | 0.22299000  | 1.13985900  |
| C  | -2.30080400 | 0.38663300  | 1.79605200  |
| C  | -1.60406400 | -0.81218900 | 1.98514700  |
| S  | -2.54926900 | -2.16915400 | 1.32799600  |
| H  | -4.22659100 | 1.04143500  | 0.90327700  |
| H  | -1.94773500 | 1.33665400  | 2.17957100  |
| Br | -5.36167600 | -1.74960000 | -0.13628800 |
| C  | 2.37197900  | 0.75064700  | -2.47530000 |
| C  | 1.68511700  | 1.90794500  | -2.32428700 |
| H  | 3.11568200  | 0.45452000  | -3.19822000 |
| H  | 1.70136500  | 2.82402500  | -2.89338400 |

|   |             |             |             |
|---|-------------|-------------|-------------|
| N | 1.95423500  | -0.09961800 | -1.45424900 |
| N | 0.85450600  | 1.73829700  | -1.21957100 |
| C | 1.00147600  | 0.49031500  | -0.64966000 |
| C | -0.07991000 | 2.74106900  | -0.77317600 |
| C | 0.27156100  | 3.56963800  | 0.31391200  |
| C | -1.29949200 | 2.87990700  | -1.46690500 |
| C | -0.65059200 | 4.54822400  | 0.70504100  |
| C | -2.18182900 | 3.87912600  | -1.03581700 |
| C | -1.86539900 | 4.70248600  | 0.04050600  |
| H | -0.41239000 | 5.20418200  | 1.53649200  |
| H | -3.12866800 | 4.01236300  | -1.55138500 |
| H | -2.56419200 | 5.47127100  | 0.36018600  |
| C | 2.51911800  | -1.40881800 | -1.24064100 |
| C | 3.78182700  | -1.50196400 | -0.62151600 |
| C | 1.80950500  | -2.54410900 | -1.68819200 |
| C | 4.32899300  | -2.78066500 | -0.44970600 |
| C | 2.40112400  | -3.79665500 | -1.48548100 |
| C | 3.64685100  | -3.91698500 | -0.87236700 |
| H | 5.30212000  | -2.88483900 | 0.02200300  |
| H | 1.88363900  | -4.69158000 | -1.81560800 |
| H | 4.08712700  | -4.90030800 | -0.72840700 |
| C | 1.62919400  | 3.46622800  | 1.00447800  |
| C | 2.61117000  | 4.49844500  | 0.41061800  |
| C | 1.54683700  | 3.60989700  | 2.53369600  |
| H | 2.02933200  | 2.46853800  | 0.80367100  |
| H | 2.73492100  | 4.36116300  | -0.66948500 |
| H | 3.59827900  | 4.40325700  | 0.87888200  |
| H | 2.25468800  | 5.52196600  | 0.57936500  |
| H | 0.85583100  | 2.87825000  | 2.96428300  |
| H | 1.22743700  | 4.61268100  | 2.84119500  |
| H | 2.53575100  | 3.43665600  | 2.97387900  |
| C | -1.66537600 | 2.01190800  | -2.66821600 |
| C | -3.03006900 | 1.31955900  | -2.49959400 |
| C | -1.62522400 | 2.83415700  | -3.97286800 |
| H | -0.91537500 | 1.22060500  | -2.75479600 |
| H | -3.05713600 | 0.71577400  | -1.58792400 |
| H | -3.22365600 | 0.65937700  | -3.35326500 |
| H | -3.85277100 | 2.04305100  | -2.45351900 |
| H | -0.64115100 | 3.28915400  | -4.13372800 |
| H | -2.36541900 | 3.64302300  | -3.95498000 |
| H | -1.84802300 | 2.19504200  | -4.83548400 |
| C | 4.56928500  | -0.27563300 | -0.16561800 |
| C | 4.95114700  | -0.34416300 | 1.32473600  |
| C | 5.82031000  | -0.06644300 | -1.04342600 |
| H | 3.93052400  | 0.60329700  | -0.28923000 |
| H | 4.06198600  | -0.44782800 | 1.95369500  |
| H | 5.47567300  | 0.57283200  | 1.61942200  |
| H | 5.62069700  | -1.18656200 | 1.53605100  |
| H | 5.55748100  | 0.03592900  | -2.10255200 |
| H | 6.51431300  | -0.91077000 | -0.95474800 |
| H | 6.35566100  | 0.84046000  | -0.73807600 |
| C | 0.47603800  | -2.42128000 | -2.42199000 |
| C | 0.70767000  | -2.31877100 | -3.94489600 |

|   |             |             |             |
|---|-------------|-------------|-------------|
| C | -0.50722100 | -3.56000400 | -2.10374400 |
| H | 0.00136800  | -1.49325400 | -2.09026600 |
| H | 1.34246500  | -1.46327900 | -4.20028100 |
| H | -0.24718200 | -2.19933000 | -4.47084600 |
| H | 1.19368400  | -3.22440800 | -4.32818700 |
| H | -0.66569000 | -3.66259200 | -1.02545700 |
| H | -0.16732800 | -4.52575800 | -2.49634200 |
| H | -1.47844100 | -3.34766100 | -2.56447300 |
| C | -0.32514200 | -0.99606000 | 2.62582200  |
| C | 0.71946100  | -1.86167300 | 2.20511100  |
| S | 0.17997400  | -0.08005900 | 4.07188600  |
| C | 1.85509600  | -1.80269000 | 3.08770100  |
| H | 0.57178900  | -2.68253900 | 1.51064800  |
| C | 1.72071500  | -0.90629100 | 4.10284400  |
| H | 2.73746600  | -2.41897700 | 2.95155700  |
| H | 2.44018900  | -0.65841200 | 4.87255600  |

---

#### TS5

Energy (RB3LYP) = -2446.710218430069 A.U.

Free Energy = -2446.116324765342 A.U.

---

|    |             |             |             |
|----|-------------|-------------|-------------|
| Ni | -0.66835800 | -0.27829300 | -1.04416800 |
| C  | 1.44831700  | -0.03110200 | -2.05860600 |
| C  | 0.63820800  | -1.15928400 | -2.32045000 |
| C  | -0.52720900 | -0.83452900 | -3.08933100 |
| C  | -0.60709700 | 0.51908400  | -3.38591100 |
| S  | 0.85200000  | 1.38381800  | -2.95379900 |
| H  | 0.92765000  | -2.17011100 | -2.05229100 |
| H  | -1.27002900 | -1.55789000 | -3.40624600 |
| C  | -2.50554000 | 1.21373200  | 2.36072700  |
| C  | -3.15538000 | 0.03580100  | 2.20785600  |
| H  | -2.60219600 | 1.98699600  | 3.10655400  |
| H  | -3.93792600 | -0.42656900 | 2.78914000  |
| N  | -1.58318400 | 1.30384700  | 1.31813500  |
| N  | -2.62116000 | -0.56961600 | 1.07301900  |
| C  | -1.62966700 | 0.19837100  | 0.49110500  |
| C  | -3.05700600 | -1.84309000 | 0.56224300  |
| C  | -4.14257900 | -1.87980600 | -0.33710900 |
| C  | -2.39783800 | -3.01257500 | 0.99405300  |
| C  | -4.54414100 | -3.13049700 | -0.82261300 |
| C  | -2.83838900 | -4.23676300 | 0.47538400  |
| C  | -3.89772300 | -4.29845000 | -0.42617300 |
| H  | -5.37437700 | -3.18960600 | -1.52108000 |
| H  | -2.34462600 | -5.15418300 | 0.78339800  |
| H  | -4.22410900 | -5.25921500 | -0.81594400 |
| C  | -0.65666300 | 2.39887500  | 1.18360000  |
| C  | -0.98335000 | 3.47228400  | 0.32801700  |
| C  | 0.52605200  | 2.37806100  | 1.95001900  |
| C  | -0.08365200 | 4.54224500  | 0.25737500  |
| C  | 1.39068100  | 3.47546200  | 1.84215700  |
| C  | 1.09162300  | 4.54679500  | 1.00585600  |
| H  | -0.30458400 | 5.38499500  | -0.39013600 |

|    |             |             |             |
|----|-------------|-------------|-------------|
| H  | 2.30836900  | 3.48933800  | 2.42338600  |
| H  | 1.77417200  | 5.39014900  | 0.93776400  |
| C  | -4.87248600 | -0.61986800 | -0.79267000 |
| C  | -6.37053100 | -0.66854200 | -0.43474900 |
| C  | -4.66453800 | -0.36681400 | -2.29834700 |
| H  | -4.43832200 | 0.23227700  | -0.26225500 |
| H  | -6.51987000 | -0.81875400 | 0.64059900  |
| H  | -6.85971600 | 0.27113000  | -0.71749300 |
| H  | -6.88719900 | -1.48101400 | -0.95904300 |
| H  | -3.59773200 | -0.26364300 | -2.52177500 |
| H  | -5.06828100 | -1.18702500 | -2.90425500 |
| H  | -5.17286500 | 0.55598600  | -2.60403300 |
| C  | -1.23613700 | -2.98121900 | 1.98230900  |
| C  | 0.08533900  | -3.38703800 | 1.30166100  |
| C  | -1.51687000 | -3.84873200 | 3.22444900  |
| H  | -1.11493800 | -1.95017900 | 2.32669000  |
| H  | 0.30784700  | -2.70873800 | 0.47102000  |
| H  | 0.91539500  | -3.33762300 | 2.01659100  |
| H  | 0.03801000  | -4.41116200 | 0.91164400  |
| H  | -2.44499000 | -3.54627600 | 3.72298100  |
| H  | -1.60700600 | -4.91085000 | 2.96831200  |
| H  | -0.69678100 | -3.75278600 | 3.94571300  |
| C  | -2.29101400 | 3.50146500  | -0.45851800 |
| C  | -2.13339300 | 4.08418500  | -1.87350100 |
| C  | -3.38008600 | 4.26632300  | 0.32295400  |
| H  | -2.62494100 | 2.46652300  | -0.57719300 |
| H  | -1.33267600 | 3.57711200  | -2.42100000 |
| H  | -3.06755500 | 3.95743000  | -2.43326300 |
| H  | -1.90993400 | 5.15753300  | -1.85863400 |
| H  | -3.56406800 | 3.81484500  | 1.30385900  |
| H  | -3.08593700 | 5.31081200  | 0.48354900  |
| H  | -4.32617000 | 4.26349900  | -0.23206400 |
| C  | 0.86884100  | 1.23088100  | 2.89628200  |
| C  | 0.74519500  | 1.67406000  | 4.36844300  |
| C  | 2.26125700  | 0.63753700  | 2.61525300  |
| H  | 0.14240500  | 0.43044600  | 2.73038500  |
| H  | -0.26132200 | 2.04434400  | 4.59468700  |
| H  | 0.95611900  | 0.83385200  | 5.04078000  |
| H  | 1.45496500  | 2.47657400  | 4.60266000  |
| H  | 2.34885200  | 0.31277000  | 1.57450700  |
| H  | 3.06145100  | 1.36086100  | 2.81171300  |
| H  | 2.43739700  | -0.22906700 | 3.26361300  |
| C  | 2.75719900  | 0.01297400  | -1.44557400 |
| C  | 3.47946600  | 1.10828300  | -1.01530400 |
| S  | 3.69392700  | -1.46302100 | -1.20601100 |
| C  | 4.76352600  | 0.78801400  | -0.48653700 |
| H  | 3.08403300  | 2.11770400  | -1.04769200 |
| C  | 5.00778500  | -0.55423400 | -0.51697900 |
| H  | 5.46032400  | 1.51808200  | -0.09261600 |
| H  | -1.38299500 | 1.02081700  | -3.94800800 |
| Br | 6.59373100  | -1.45974000 | 0.13505300  |

---

## CPs and TSs with Pd(0)dppp

### Pd(0)dppp

Energy (RB3LYP) = -1854.006154752044 A.U.

Free Energy = -1853.617597560421 A.U.

|   |             |             |             |
|---|-------------|-------------|-------------|
| P | -1.92852200 | -0.30706800 | 0.04020700  |
| P | 1.94870500  | -0.24418100 | 0.05018300  |
| C | 1.34075400  | -0.38911400 | 1.82769300  |
| H | 2.11542700  | 0.01054000  | 2.49473000  |
| H | 1.24452400  | -1.45988600 | 2.04763900  |
| C | -1.29739700 | -0.44163300 | 1.80650300  |
| H | -1.14645500 | -1.51576700 | 1.96953200  |
| H | -2.09441900 | -0.14444900 | 2.50042700  |
| C | 0.00470700  | 0.32710000  | 2.14261900  |
| H | -0.00493500 | 0.50612800  | 3.22640900  |
| H | -0.00530200 | 1.32216300  | 1.68046600  |
| C | -2.73686000 | 1.35817200  | -0.02520500 |
| C | -3.11714400 | 1.83386500  | -1.29260900 |
| C | -2.97065600 | 2.17852200  | 1.08942200  |
| C | -3.73201000 | 3.07624900  | -1.43890000 |
| H | -2.91951300 | 1.22290700  | -2.17028300 |
| C | -3.57385800 | 3.43110700  | 0.94256300  |
| H | -2.68200500 | 1.85217100  | 2.08365500  |
| C | -3.96034500 | 3.88146000  | -0.31963300 |
| H | -4.02327700 | 3.42107300  | -2.42767500 |
| H | -3.74090600 | 4.05305100  | 1.81840900  |
| H | -4.42957100 | 4.85518600  | -0.43272200 |
| C | -3.38039800 | -1.45956400 | 0.14145300  |
| C | -3.23793100 | -2.74089500 | -0.41234700 |
| C | -4.59352800 | -1.12385000 | 0.76311100  |
| C | -4.27545100 | -3.67189500 | -0.33314200 |
| H | -2.30805700 | -3.00076900 | -0.91352900 |
| C | -5.63454100 | -2.05082200 | 0.83411200  |
| H | -4.73146400 | -0.13130600 | 1.18338700  |
| C | -5.47676200 | -3.32760700 | 0.28924800  |
| H | -4.14851900 | -4.66083400 | -0.76612100 |
| H | -6.57057900 | -1.77539800 | 1.31369500  |
| H | -6.28921700 | -4.04757800 | 0.34387600  |
| C | 2.65234200  | 1.47305100  | 0.06297900  |
| C | 1.93498400  | 2.49137000  | -0.58320600 |
| C | 3.85368700  | 1.80172900  | 0.71160200  |
| C | 2.39824600  | 3.80911800  | -0.56992900 |
| H | 1.01207100  | 2.23915400  | -1.10053600 |
| C | 4.32097500  | 3.11640700  | 0.71783100  |
| H | 4.43502200  | 1.02622500  | 1.20312300  |
| C | 3.59272900  | 4.12387500  | 0.07953200  |
| H | 1.82875100  | 4.58610300  | -1.07337800 |
| H | 5.25608100  | 3.35428500  | 1.21882300  |
| H | 3.95900600  | 5.14727700  | 0.08408000  |
| C | 3.47254400  | -1.30098500 | 0.06614100  |
| C | 4.03966900  | -1.61821200 | -1.18016100 |
| C | 4.07337000  | -1.82345100 | 1.22281400  |

|    |            |             |             |
|----|------------|-------------|-------------|
| C  | 5.18235000 | -2.41176300 | -1.26832300 |
| H  | 3.57070200 | -1.24398200 | -2.08742600 |
| C  | 5.21071400 | -2.63118700 | 1.13483300  |
| H  | 3.66035700 | -1.60735100 | 2.20320400  |
| C  | 5.77075900 | -2.92378700 | -0.10886300 |
| H  | 5.60688400 | -2.64066400 | -2.24239300 |
| H  | 5.65848900 | -3.02972900 | 2.04182600  |
| H  | 6.65500600 | -3.55207700 | -0.17585500 |
| Pd | 0.01355300 | -0.57481100 | -1.15608800 |

### CP1

Energy (RB3LYP) = -2432.131175428226 A.U.

Free Energy = -2431.707195061825 A.U.

|    |             |             |             |
|----|-------------|-------------|-------------|
| Pd | 0.03835400  | 0.09104600  | -0.66466800 |
| P  | 1.68704300  | -1.51357000 | 0.07604500  |
| P  | -1.80339700 | -1.44463000 | -0.62230700 |
| C  | -1.29937400 | -3.21386300 | -0.95676300 |
| H  | -2.17839200 | -3.86623000 | -0.89238400 |
| H  | -0.98059300 | -3.23694400 | -2.00666900 |
| C  | 1.25077600  | -3.27411100 | -0.39450400 |
| H  | 1.41027400  | -3.32907600 | -1.47915800 |
| H  | 1.98875800  | -3.95291200 | 0.04996900  |
| C  | -0.17406800 | -3.75581800 | -0.05236200 |
| H  | -0.17753700 | -4.85006100 | -0.14733600 |
| H  | -0.40435600 | -3.54836800 | 1.00026800  |
| C  | 1.80140700  | -1.55619300 | 1.91912300  |
| C  | 1.74843300  | -0.32460000 | 2.59461800  |
| C  | 1.93375200  | -2.73136300 | 2.67640300  |
| C  | 1.84034400  | -0.27018200 | 3.98560900  |
| H  | 1.62960500  | 0.59431700  | 2.02663000  |
| C  | 2.01553000  | -2.67646200 | 4.06992600  |
| H  | 1.97509400  | -3.70044200 | 2.18839000  |
| C  | 1.97173400  | -1.44622000 | 4.72729800  |
| H  | 1.80096500  | 0.69209500  | 4.48886800  |
| H  | 2.11368900  | -3.59690000 | 4.63974900  |
| H  | 2.03536200  | -1.40466300 | 5.81140400  |
| C  | 3.45194800  | -1.48438800 | -0.47826800 |
| C  | 3.72980500  | -0.98905000 | -1.76137800 |
| C  | 4.51042800  | -1.96960400 | 0.30593900  |
| C  | 5.03475700  | -0.99548600 | -2.25724600 |
| H  | 2.92629400  | -0.57652400 | -2.36420800 |
| C  | 5.81563700  | -1.96671500 | -0.18815500 |
| H  | 4.31951500  | -2.34119700 | 1.30835500  |
| C  | 6.08018100  | -1.48367200 | -1.47172800 |
| H  | 5.23408700  | -0.60413500 | -3.25125000 |
| H  | 6.62685300  | -2.33938300 | 0.43212300  |
| H  | 7.09781700  | -1.47945900 | -1.85338600 |
| C  | -2.72859500 | -1.53562500 | 0.97168000  |
| C  | -2.70772500 | -0.39794000 | 1.79574000  |
| C  | -3.43612000 | -2.66833000 | 1.40795600  |
| C  | -3.38770800 | -0.38721500 | 3.01457000  |



|    |             |             |             |
|----|-------------|-------------|-------------|
| H  | -2.14786400 | 0.47824500  | 1.48002300  |
| C  | -4.11009400 | -2.65984400 | 2.63065400  |
| H  | -3.46854400 | -3.56612100 | 0.79743200  |
| C  | -4.08917900 | -1.51854500 | 3.43504600  |
| H  | -3.35990700 | 0.50254900  | 3.63753700  |
| H  | -4.65027800 | -3.54577400 | 2.95428700  |
| H  | -4.61290500 | -1.51394300 | 4.38725200  |
| C  | -3.10270000 | -1.21169800 | -1.91825200 |
| C  | -4.47001300 | -1.44420600 | -1.70926500 |
| C  | -2.67659900 | -0.78121300 | -3.18646300 |
| C  | -5.38656100 | -1.25966300 | -2.74708300 |
| H  | -4.82543900 | -1.76087600 | -0.73358900 |
| C  | -3.59124100 | -0.61030400 | -4.22580900 |
| H  | -1.62280200 | -0.56863400 | -3.35316400 |
| C  | -4.95041500 | -0.84759700 | -4.00730000 |
| H  | -6.44381600 | -1.43757600 | -2.56784200 |
| H  | -3.24398100 | -0.27999000 | -5.20125600 |
| H  | -5.66584800 | -0.70415100 | -4.81261300 |
| C  | -0.55224300 | 3.39934100  | 0.69993800  |
| C  | -1.39125100 | 2.82890300  | -0.19363500 |
| C  | -0.69016900 | 2.08520200  | -1.23013500 |
| C  | 0.73011000  | 2.07483200  | -1.01487700 |
| S  | 1.15542300  | 3.10205400  | 0.40106900  |
| H  | -2.47057700 | 2.92500100  | -0.15454000 |
| H  | -1.11704600 | 1.99160800  | -2.22407000 |
| Br | 1.96130900  | 2.31356200  | -2.60091800 |
| Br | -1.08470600 | 4.37219100  | 2.30214800  |

---

### CP2

Energy (RB3LYP) = -2432.173754466570 A.U.

Free Energy = -2431.746852892057 A.U.

---

|    |             |             |             |
|----|-------------|-------------|-------------|
| Pd | -0.28779900 | -0.40723700 | -0.06903300 |
| P  | 0.45513300  | 1.50391800  | 1.03190900  |
| P  | -2.61598100 | -0.15713800 | 0.59932500  |
| C  | -2.88348700 | 0.91793800  | 2.09882900  |
| H  | -3.95838400 | 1.09171400  | 2.22279100  |
| H  | -2.58174200 | 0.29937100  | 2.95345000  |
| C  | -0.61473900 | 2.10877800  | 2.43919200  |
| H  | -0.48352500 | 1.42282700  | 3.28329900  |
| H  | -0.20466100 | 3.07646800  | 2.75034000  |
| C  | -2.11362000 | 2.25069300  | 2.12393900  |
| H  | -2.55446200 | 2.87819600  | 2.90937200  |
| H  | -2.25482000 | 2.80153000  | 1.18580700  |
| C  | 0.47155600  | 2.96832500  | -0.08066300 |
| C  | -0.11740800 | 2.87680000  | -1.35010400 |
| C  | 1.00250700  | 4.20031800  | 0.33874400  |
| C  | -0.17501400 | 3.99490900  | -2.18561100 |
| H  | -0.52833400 | 1.92705000  | -1.68164000 |
| C  | 0.94715700  | 5.31381400  | -0.49855500 |
| H  | 1.47480800  | 4.28810700  | 1.31340000  |
| C  | 0.35749800  | 5.21271200  | -1.76190000 |

|    |             |             |             |
|----|-------------|-------------|-------------|
| H  | -0.63376400 | 3.90911700  | -3.16651300 |
| H  | 1.36601200  | 6.25967800  | -0.16594700 |
| H  | 0.31643500  | 6.08158600  | -2.41313300 |
| C  | 2.11585900  | 1.43965200  | 1.81702100  |
| C  | 2.26925200  | 0.85661100  | 3.08526300  |
| C  | 3.25706300  | 1.89091500  | 1.13647500  |
| C  | 3.53142200  | 0.75066000  | 3.66922600  |
| H  | 1.41111400  | 0.46403700  | 3.62267400  |
| C  | 4.51798700  | 1.78130300  | 1.72297200  |
| H  | 3.16616400  | 2.31201800  | 0.14168300  |
| C  | 4.65888700  | 1.21593600  | 2.99095700  |
| H  | 3.63208600  | 0.29667500  | 4.65116400  |
| H  | 5.39208100  | 2.12943400  | 1.18013000  |
| H  | 5.64275400  | 1.12732100  | 3.44303500  |
| C  | -3.62366500 | 0.63387200  | -0.72867800 |
| C  | -3.48764500 | 0.13987100  | -2.03905500 |
| C  | -4.50542500 | 1.70201500  | -0.49700700 |
| C  | -4.22567300 | 0.69748800  | -3.08310200 |
| H  | -2.80584800 | -0.68355600 | -2.23488100 |
| C  | -5.23628000 | 2.26194500  | -1.54783200 |
| H  | -4.63407900 | 2.11128500  | 0.49972600  |
| C  | -5.09948900 | 1.76039300  | -2.84234000 |
| H  | -4.11293500 | 0.29931500  | -4.08780000 |
| H  | -5.91231600 | 3.08966100  | -1.35018500 |
| H  | -5.66944700 | 2.19578500  | -3.65880900 |
| C  | -3.55846600 | -1.65321400 | 1.10746200  |
| C  | -4.96134700 | -1.67374000 | 1.08589600  |
| C  | -2.86151000 | -2.76765100 | 1.59579800  |
| C  | -5.65536300 | -2.78871800 | 1.55679800  |
| H  | -5.51373200 | -0.82595600 | 0.69005300  |
| C  | -3.55983800 | -3.87789700 | 2.07311000  |
| H  | -1.77664000 | -2.77777700 | 1.57217500  |
| C  | -4.95551300 | -3.89030500 | 2.05440200  |
| H  | -6.74177500 | -2.79843000 | 1.52975300  |
| H  | -3.01024200 | -4.73939200 | 2.44198400  |
| H  | -5.49721400 | -4.75991000 | 2.41690200  |
| C  | 3.99697800  | -1.29310200 | -1.12805500 |
| C  | 3.61116800  | -0.34033000 | -2.02365000 |
| C  | 2.25403100  | 0.07098100  | -1.80370700 |
| C  | 1.62789000  | -0.57518000 | -0.76468800 |
| S  | 2.71930500  | -1.71977500 | -0.02587800 |
| H  | 4.25177600  | 0.05140600  | -2.80570600 |
| H  | 1.76789500  | 0.82123600  | -2.41876000 |
| Br | -0.86476200 | -2.51451500 | -1.44674500 |
| Br | 5.74152600  | -2.15451200 | -1.04097300 |

---

### CP3

Energy (RB3LYP) = -2971.343093019863 A.U.

Free Energy = -2970.865601207367 A.U.

---

|    |             |             |            |
|----|-------------|-------------|------------|
| Pd | -0.21816400 | -0.29783700 | 0.06484200 |
| P  | 0.56769000  | 1.90299900  | 0.79204400 |

|   |             |             |             |                   |                    |             |             |
|---|-------------|-------------|-------------|-------------------|--------------------|-------------|-------------|
| P | -2.49402400 | 0.12878800  | 0.80505800  | H                 | -5.44762400        | -4.38335300 | 2.77638200  |
| C | -2.68512700 | 1.41706000  | 2.14506100  | C                 | 3.92615200         | -1.86968700 | -0.86912700 |
| H | -3.75727300 | 1.56542600  | 2.31792800  | C                 | 3.42578200         | -1.47794600 | -2.07480900 |
| H | -2.26183200 | 1.00930700  | 3.07055600  | C                 | 2.10806000         | -0.92617100 | -1.94519400 |
| C | -0.48736600 | 2.77997200  | 2.06067600  | C                 | 1.62088800         | -0.87807500 | -0.65778600 |
| H | -0.25230300 | 2.29072300  | 3.01415000  | S                 | 2.80883900         | -1.56312800 | 0.42975100  |
| H | -0.12230700 | 3.80902100  | 2.15757400  | H                 | 3.95843400         | -1.58143500 | -3.01348500 |
| C | -2.01060700 | 2.76626100  | 1.83805700  | H                 | 1.52552000         | -0.61166500 | -2.80588100 |
| H | -2.44805700 | 3.51460800  | 2.51174100  | Br                | 5.67565900         | -2.66374400 | -0.54393300 |
| H | -2.26275900 | 3.09499400  | 0.82250100  | C                 | -0.80314800        | -2.10198600 | -0.70194100 |
| C | 0.65275900  | 3.07209500  | -0.63123200 | C                 | -0.74960300        | -3.36246600 | -0.16050400 |
| C | 1.32866500  | 2.64509400  | -1.78898700 | S                 | -1.48539900        | -2.19429100 | -2.31316200 |
| C | 0.07096300  | 4.34963100  | -0.62318200 | C                 | -1.26117200        | -4.39372900 | -1.01693600 |
| C | 1.42489400  | 3.48085400  | -2.90159600 | H                 | -0.34471100        | -3.56352000 | 0.82617700  |
| H | 1.78105400  | 1.65816100  | -1.81374300 | C                 | -1.70020700        | -3.92319800 | -2.22186200 |
| C | 0.16010600  | 5.17927300  | -1.74367300 | H                 | -1.29059400        | -5.44327500 | -0.73902000 |
| H | -0.45645400 | 4.71398500  | 0.25192000  | H                 | -2.12311500        | -4.47587900 | -3.05076200 |
| C | 0.83791200  | 4.74839400  | -2.88428300 |                   |                    |             |             |
| H | 1.95660500  | 3.13713500  | -3.78473000 |                   |                    |             |             |
| H | -0.30002900 | 6.16354600  | -1.72020700 |                   |                    |             |             |
| H | 0.90838700  | 5.39570300  | -3.75429300 | <b>CP4</b>        |                    |             |             |
| C | 2.20546400  | 2.05432500  | 1.62413200  | Energy (RB3LYP) = | -2971.378146147386 | A.U.        |             |
| C | 2.50042700  | 1.15720500  | 2.66291600  | Free Energy =     | -2970.901488340466 | A.U.        |             |
| C | 3.13579500  | 3.05185100  | 1.30166900  |                   |                    |             |             |
| C | 3.69320600  | 1.26656000  | 3.37645400  | Pd                | -0.19031000        | -0.06970200 | 0.13559000  |
| H | 1.80260100  | 0.35919100  | 2.90490500  | P                 | 1.72993400         | 0.10735800  | -1.28093200 |
| C | 4.33537100  | 3.15174100  | 2.00986200  | P                 | -1.33453700        | 1.87140500  | -0.64996900 |
| H | 2.92986000  | 3.74948000  | 0.49616900  | C                 | -0.95091800        | 2.20029400  | -2.45225600 |
| C | 4.61470900  | 2.26365400  | 3.04925100  | H                 | -1.45987100        | 3.12114800  | -2.76330100 |
| H | 3.91039300  | 0.56162200  | 4.17410600  | H                 | -1.38171300        | 1.37698700  | -3.03576200 |
| H | 5.05156500  | 3.92529100  | 1.74586400  | C                 | 1.32728200         | 0.98497100  | -2.88547400 |
| H | 5.55005300  | 2.34169800  | 3.59669500  | H                 | 0.73577700         | 0.26341200  | -3.46343000 |
| C | -3.56530300 | 0.82767100  | -0.52200900 | H                 | 2.25182500         | 1.13797400  | -3.45597700 |
| C | -2.97205300 | 1.31880300  | -1.69379000 | C                 | 0.55509200         | 2.31667800  | -2.77195700 |
| C | -4.95829200 | 0.92766400  | -0.36889900 | H                 | 0.63934500         | 2.82191000  | -3.74337600 |
| C | -3.75453600 | 1.90608600  | -2.69119500 | H                 | 1.04136000         | 2.98343600  | -2.04894700 |
| H | -1.89732000 | 1.23084600  | -1.82721800 | C                 | 3.12020200         | 1.08937900  | -0.55943700 |
| C | -5.73796000 | 1.51091800  | -1.36663300 | C                 | 3.48644900         | 0.79594800  | 0.76651900  |
| H | -5.43636700 | 0.53487500  | 0.52444200  | C                 | 3.81218000         | 2.10679000  | -1.23497500 |
| C | -5.13658900 | 2.00250100  | -2.52906100 | C                 | 4.52339900         | 1.48907200  | 1.39034700  |
| H | -3.28180900 | 2.27906900  | -3.59545900 | H                 | 2.95816800         | 0.01766200  | 1.31016900  |
| H | -6.81519700 | 1.57830700  | -1.23960400 | C                 | 4.84275600         | 2.80969500  | -0.60451100 |
| H | -5.74653800 | 2.45364200  | -3.30719000 | H                 | 3.55574500         | 2.36323200  | -2.25817100 |
| C | -3.47147100 | -1.28594100 | 1.46640300  | C                 | 5.20269200         | 2.50145400  | 0.70776700  |
| C | -3.96118700 | -2.25394800 | 0.57247500  | H                 | 4.79296100         | 1.23976100  | 2.41309300  |
| C | -3.69667200 | -1.46347000 | 2.84060500  | H                 | 5.36349100         | 3.59757200  | -1.14277700 |
| C | -4.67183300 | -3.35685800 | 1.04320900  | H                 | 6.00483800         | 3.04829800  | 1.19643000  |
| H | -3.78395800 | -2.15038200 | -0.49292600 | C                 | 2.57661800         | -1.39412400 | -1.95620100 |
| C | -4.40474800 | -2.57281500 | 3.30881000  | C                 | 1.80804800         | -2.55772100 | -2.11890300 |
| H | -3.32683300 | -0.74318500 | 3.56265400  | C                 | 3.92818300         | -1.41524500 | -2.33492000 |
| C | -4.89676900 | -3.52051600 | 2.41172300  | C                 | 2.37385700         | -3.71205500 | -2.66429200 |
| H | -5.03970400 | -4.09470600 | 0.33586300  | H                 | 0.76859600         | -2.56250600 | -1.80195700 |
| H | -4.57131700 | -2.69068600 | 4.37627000  | C                 | 4.49427800         | -2.57261800 | -2.87176800 |
|   |             |             |             | H                 | 4.54319200         | -0.52952600 | -2.20340500 |

|    |             |             |             |
|----|-------------|-------------|-------------|
| C  | 3.71821200  | -3.72190800 | -3.04078100 |
| H  | 1.76578000  | -4.60498100 | -2.78293700 |
| H  | 5.54320400  | -2.57669500 | -3.15749100 |
| H  | 4.16176700  | -4.62238000 | -3.45764400 |
| C  | -0.87104900 | 3.48930000  | 0.12072600  |
| C  | 0.24523500  | 3.53863600  | 0.96865100  |
| C  | -1.58224700 | 4.67413200  | -0.13387900 |
| C  | 0.64859600  | 4.74709400  | 1.54314800  |
| H  | 0.79543000  | 2.62490200  | 1.17757600  |
| C  | -1.18214800 | 5.87880300  | 0.44337700  |
| H  | -2.45995800 | 4.65254800  | -0.77469400 |
| C  | -0.06424100 | 5.91754600  | 1.28218600  |
| H  | 1.51689100  | 4.76872300  | 2.19620700  |
| H  | -1.74365700 | 6.78746400  | 0.24158200  |
| H  | 0.24515500  | 6.85705000  | 1.73276000  |
| C  | -3.18089300 | 1.93394900  | -0.60160000 |
| C  | -3.80257800 | 1.98416400  | 0.66015500  |
| C  | -3.99513800 | 1.84989700  | -1.74101200 |
| C  | -5.19067300 | 1.96503500  | 0.77638300  |
| H  | -3.19153800 | 2.04478700  | 1.55760300  |
| C  | -5.38829000 | 1.82112200  | -1.62347000 |
| H  | -3.55428100 | 1.80649200  | -2.73165700 |
| C  | -5.99050600 | 1.88044400  | -0.36775600 |
| H  | -5.64984600 | 2.01304500  | 1.76041500  |
| H  | -6.00014800 | 1.75444300  | -2.51939100 |
| H  | -7.07312100 | 1.85819600  | -0.27789700 |
| C  | -0.20939800 | -1.84957500 | 1.54410300  |
| C  | -1.40745400 | -1.07894900 | 1.68392900  |
| C  | -2.56900600 | -1.73744300 | 1.11757900  |
| C  | -2.27980200 | -2.95609700 | 0.60722800  |
| S  | -0.60115800 | -3.43190800 | 0.77011600  |
| H  | -1.52203500 | -0.33460300 | 2.46806000  |
| H  | -3.55378400 | -1.28649600 | 1.09060800  |
| C  | 0.96354700  | -1.80648800 | 2.42084100  |
| C  | 2.14275100  | -2.51377600 | 2.32330400  |
| S  | 0.99983400  | -0.77688600 | 3.84616100  |
| C  | 3.07240900  | -2.22454400 | 3.36593300  |
| H  | 2.34541800  | -3.20484800 | 1.51188900  |
| C  | 2.60709200  | -1.29688500 | 4.25658100  |
| H  | 4.05073700  | -2.68744700 | 3.44171800  |
| Br | -3.51003800 | -4.10835700 | -0.36680400 |
| H  | 3.09888000  | -0.89337000 | 5.13139500  |

-----

**CP5**

Energy (RB3LYP) = -2971.373285096131 A.U.

Free Energy = -2970.897708143739 A.U.

-----

|    |             |             |             |
|----|-------------|-------------|-------------|
| Pd | -0.64120700 | 0.41033500  | -0.64064000 |
| P  | 0.26930600  | 1.82772000  | 1.05431400  |
| P  | -2.73708100 | -0.03410200 | 0.40445100  |
| C  | -3.28547400 | 1.41856000  | 1.45076000  |
| H  | -4.22789600 | 1.16271100  | 1.95105500  |

|   |             |             |             |
|---|-------------|-------------|-------------|
| H | -3.49443800 | 2.25399900  | 0.77072300  |
| C | -1.08243200 | 2.72893200  | 1.98659800  |
| H | -1.46038800 | 3.48130600  | 1.28253300  |
| H | -0.63688000 | 3.29243200  | 2.81582000  |
| C | -2.25425800 | 1.86971400  | 2.50740600  |
| H | -2.79556400 | 2.47630100  | 3.24576100  |
| H | -1.87774800 | 0.99937700  | 3.05907300  |
| C | 1.21521800  | 0.94173400  | 2.37335200  |
| C | 2.15872700  | -0.01173600 | 1.95050600  |
| C | 1.04230000  | 1.14480400  | 3.75152500  |
| C | 2.91549300  | -0.72889600 | 2.87689900  |
| H | 2.30110200  | -0.19009100 | 0.88839800  |
| C | 1.79239300  | 0.41768900  | 4.68009300  |
| H | 0.32145300  | 1.86984400  | 4.11647200  |
| C | 2.73144800  | -0.51839600 | 4.24592200  |
| H | 3.64158400  | -1.45754000 | 2.52667000  |
| H | 1.64048800  | 0.58595100  | 5.74325800  |
| H | 3.31380300  | -1.08319100 | 4.96914500  |
| C | 1.36672900  | 3.26220400  | 0.64298100  |
| C | 1.25622900  | 3.82176900  | -0.63959800 |
| C | 2.27474900  | 3.82619100  | 1.55307700  |
| C | 2.02406900  | 4.93169900  | -0.99882400 |
| H | 0.57904500  | 3.37423900  | -1.36224300 |
| C | 3.04726300  | 4.93036400  | 1.18982100  |
| H | 2.38702700  | 3.39716300  | 2.54479200  |
| C | 2.92133500  | 5.48760700  | -0.08517400 |
| H | 1.92811500  | 5.35281400  | -1.99624700 |
| H | 3.74952800  | 5.35487700  | 1.90291700  |
| H | 3.52537800  | 6.34636100  | -0.36644200 |
| C | -2.78782500 | -1.41023100 | 1.64203200  |
| C | -1.58181300 | -2.00302800 | 2.04387900  |
| C | -3.98954900 | -1.86496400 | 2.21092500  |
| C | -1.57461100 | -3.02264200 | 2.99968400  |
| H | -0.64865900 | -1.66258700 | 1.60278700  |
| C | -3.98230400 | -2.88517000 | 3.16149200  |
| H | -4.93557400 | -1.42936500 | 1.89975700  |
| C | -2.77370300 | -3.46511900 | 3.55873900  |
| H | -0.63151300 | -3.47044200 | 3.30109200  |
| H | -4.91943800 | -3.23051300 | 3.59073000  |
| H | -2.76995200 | -4.26173100 | 4.29819500  |
| C | -4.23353200 | -0.38657400 | -0.62250300 |
| C | -4.26158100 | -1.59209300 | -1.34856100 |
| C | -5.29948600 | 0.51126400  | -0.78498200 |
| C | -5.32563500 | -1.89481100 | -2.19519200 |
| H | -3.44388000 | -2.30111400 | -1.24324900 |
| C | -6.36294300 | 0.21152900  | -1.64227500 |
| H | -5.31470600 | 1.45214700  | -0.24441100 |
| C | -6.38177300 | -0.99068000 | -2.34759200 |
| H | -5.33063200 | -2.83592300 | -2.73906100 |
| H | -7.17865500 | 0.92157700  | -1.75250100 |
| H | -7.20943400 | -1.22312400 | -3.01219300 |
| C | 0.68244600  | 0.05140500  | -2.47962200 |
| C | -0.56479400 | -0.63173700 | -2.60861600 |

|    |             |             |             |
|----|-------------|-------------|-------------|
| C  | -1.43462300 | -0.00835500 | -3.58529400 |
| C  | -0.89268000 | 1.07732300  | -4.19092600 |
| S  | 0.73840700  | 1.41554000  | -3.64804200 |
| H  | -0.68061600 | -1.67832100 | -2.33826000 |
| H  | -2.43506000 | -0.37312200 | -3.79272900 |
| C  | 1.95359400  | -0.51817500 | -2.03291700 |
| C  | 3.18454200  | 0.08925100  | -1.91196000 |
| S  | 2.07441900  | -2.22146900 | -1.58974000 |
| C  | 4.22242300  | -0.77630500 | -1.45165900 |
| H  | 3.34217800  | 1.14069900  | -2.12655000 |
| C  | 3.76754300  | -2.04230200 | -1.22840700 |
| H  | 5.24775900  | -0.46553300 | -1.29039800 |
| Br | 4.79875800  | -3.54996900 | -0.57068800 |
| H  | -1.36098800 | 1.73992800  | -4.90786400 |

-----

**CP6**

Energy (RB3LYP) = -2971.385224941946 A.U.

Free Energy = -2970.908747210777 A.U.

-----

|    |             |             |             |
|----|-------------|-------------|-------------|
| Pd | -0.21907600 | -0.32167800 | -0.69457300 |
| P  | -2.10940400 | -0.93904900 | 0.67178300  |
| P  | 1.16626300  | -2.16917000 | -0.04688400 |
| C  | 0.18421500  | -3.69334900 | 0.40766700  |
| H  | 0.87560900  | -4.47839900 | 0.73791900  |
| H  | -0.30784200 | -4.05490400 | -0.50396700 |
| C  | -2.18336100 | -2.77736100 | 1.02549000  |
| H  | -2.51664400 | -3.23480700 | 0.08500000  |
| H  | -2.98521500 | -2.96805400 | 1.74924400  |
| C  | -0.87996800 | -3.45296500 | 1.49879400  |
| H  | -1.15391100 | -4.43532000 | 1.90595500  |
| H  | -0.44066300 | -2.89721800 | 2.33656000  |
| C  | -1.99767900 | -0.16086000 | 2.34466200  |
| C  | -1.62025500 | 1.19301900  | 2.39666900  |
| C  | -2.25034800 | -0.83282700 | 3.55121100  |
| C  | -1.51267800 | 1.85644700  | 3.61925100  |
| H  | -1.40367600 | 1.72621300  | 1.47449700  |
| C  | -2.13254700 | -0.16987500 | 4.77562300  |
| H  | -2.54072500 | -1.87891200 | 3.54990100  |
| C  | -1.76606700 | 1.17602600  | 4.81273600  |
| H  | -1.22288800 | 2.90364200  | 3.63762600  |
| H  | -2.32815200 | -0.70820300 | 5.69946900  |
| H  | -1.67493000 | 1.69056800  | 5.76567300  |
| C  | -3.87227000 | -0.66368200 | 0.18106200  |
| C  | -4.18840200 | -0.69865400 | -1.18556100 |
| C  | -4.90448100 | -0.46718600 | 1.11215900  |
| C  | -5.51047400 | -0.55776700 | -1.61138500 |
| H  | -3.39531700 | -0.81355800 | -1.91833200 |
| C  | -6.22419600 | -0.31742500 | 0.68371600  |
| H  | -4.67877600 | -0.42139700 | 2.17353700  |
| C  | -6.53062700 | -0.36626300 | -0.67817000 |
| H  | -5.73849000 | -0.58254400 | -2.67362600 |
| H  | -7.01308800 | -0.15986700 | 1.41488100  |

|    |             |             |             |
|----|-------------|-------------|-------------|
| H  | -7.55867800 | -0.24653000 | -1.00999000 |
| C  | 2.21360900  | -1.94061500 | 1.45929500  |
| C  | 1.99507200  | -0.81887800 | 2.27213900  |
| C  | 3.20485300  | -2.86548900 | 1.82872600  |
| C  | 2.74510200  | -0.62907000 | 3.43603300  |
| H  | 1.23751500  | -0.09348800 | 1.98842200  |
| C  | 3.95478000  | -2.67367800 | 2.98830800  |
| H  | 3.40064600  | -3.73081200 | 1.20061200  |
| C  | 3.72468900  | -1.55497800 | 3.79504200  |
| H  | 2.56392100  | 0.24509800  | 4.05530600  |
| H  | 4.72144500  | -3.39421600 | 3.26150100  |
| H  | 4.31212400  | -1.40555300 | 4.69722700  |
| C  | 2.38330700  | -2.80650700 | -1.28182700 |
| C  | 3.44207400  | -1.95886300 | -1.65586400 |
| C  | 2.27390400  | -4.05497400 | -1.91223200 |
| C  | 4.36824200  | -2.35339000 | -2.61855800 |
| H  | 3.54141900  | -0.98466200 | -1.18392100 |
| C  | 3.19828900  | -4.44620600 | -2.88571200 |
| H  | 1.47026700  | -4.73623100 | -1.65227700 |
| C  | 4.24776600  | -3.60000500 | -3.24026600 |
| H  | 5.18274300  | -1.68612100 | -2.88798300 |
| H  | 3.09499300  | -5.41728300 | -3.36300300 |
| H  | 4.96572000  | -3.90559600 | -3.99644900 |
| C  | 1.32099600  | 3.00081900  | -0.88585600 |
| C  | 1.85249200  | 1.89201600  | -1.48217200 |
| C  | 0.89008800  | 0.99925900  | -2.08656200 |
| C  | -0.45369600 | 1.44810300  | -1.87612700 |
| S  | -0.45179000 | 3.03141800  | -1.03642000 |
| H  | 2.92296600  | 1.71390700  | -1.52892800 |
| H  | 1.15912700  | 0.35977100  | -2.92136600 |
| C  | 2.00122800  | 4.04981100  | -0.15361100 |
| C  | 1.57661700  | 5.33499100  | 0.11207800  |
| S  | 3.59265300  | 3.78598900  | 0.54421300  |
| C  | 2.52032900  | 6.10694000  | 0.84843000  |
| H  | 0.62323100  | 5.71880700  | -0.23526400 |
| C  | 3.66115500  | 5.41258600  | 1.14602100  |
| H  | 2.35869400  | 7.14067200  | 1.13489700  |
| Br | -1.78366400 | 1.30475600  | -3.39052500 |
| H  | 4.53704700  | 5.75561400  | 1.68019000  |

-----

**CP7**

Energy (RB3LYP) = -2971.383534383272 A.U.

Free Energy = -2970.907618705002 A.U.

-----

|    |            |             |             |
|----|------------|-------------|-------------|
| Pd | 1.15698100 | 0.16880000  | -0.91197100 |
| P  | 2.91375700 | -0.95533100 | 0.23664700  |
| P  | 1.36149400 | 2.30008600  | 0.14988000  |
| C  | 3.10513300 | 2.60776300  | 0.76193100  |
| H  | 3.11883700 | 3.53760500  | 1.34399100  |
| H  | 3.74071200 | 2.76655300  | -0.11883300 |
| C  | 4.21927300 | 0.24224300  | 0.84271600  |
| H  | 4.75025000 | 0.57302000  | -0.05899900 |

|   |             |             |             |
|---|-------------|-------------|-------------|
| H | 4.96139700  | -0.29555600 | 1.44532100  |
| C | 3.69644600  | 1.46885900  | 1.62056600  |
| H | 4.54680000  | 1.89025900  | 2.17296600  |
| H | 2.97264600  | 1.15890100  | 2.38516300  |
| C | 2.40471400  | -1.87817800 | 1.75475500  |
| C | 1.18883600  | -2.58245800 | 1.69196500  |
| C | 3.13301100  | -1.90502900 | 2.95486700  |
| C | 0.72575600  | -3.30559500 | 2.79154500  |
| H | 0.60164000  | -2.55622000 | 0.77733300  |
| C | 2.66281800  | -2.62030100 | 4.05911500  |
| H | 4.07291400  | -1.36848500 | 3.04173800  |
| C | 1.46059300  | -3.32460000 | 3.97936200  |
| H | -0.21431000 | -3.84639800 | 2.72180300  |
| H | 3.23832600  | -2.62573700 | 4.98126900  |
| H | 1.09605000  | -3.88047300 | 4.83915400  |
| C | 3.98715700  | -2.16047000 | -0.67243000 |
| C | 4.21772600  | -1.92132000 | -2.03742700 |
| C | 4.58651500  | -3.27897700 | -0.07397500 |
| C | 5.04255900  | -2.76612500 | -2.78101800 |
| H | 3.73896000  | -1.06998500 | -2.51651900 |
| C | 5.40129900  | -4.13178600 | -0.82178800 |
| H | 4.41222000  | -3.49106500 | 0.97671800  |
| C | 5.63459600  | -3.87626500 | -2.17438100 |
| H | 5.21302300  | -2.56438000 | -3.83543400 |
| H | 5.85387800  | -4.99778700 | -0.34536300 |
| H | 6.26827600  | -4.54207300 | -2.75426900 |
| C | 0.39396100  | 2.53001200  | 1.71205100  |
| C | -0.20149300 | 1.40776900  | 2.30690500  |
| C | 0.25291800  | 3.78170500  | 2.33378800  |
| C | -0.91373100 | 1.53087900  | 3.50276800  |
| H | -0.10744000 | 0.43766700  | 1.82579800  |
| C | -0.46214400 | 3.90493900  | 3.52476200  |
| H | 0.69139700  | 4.66590300  | 1.87830100  |
| C | -1.04556000 | 2.77876500  | 4.11259600  |
| H | -1.36948900 | 0.65194500  | 3.95062300  |
| H | -0.56822400 | 4.88041100  | 3.99267400  |
| H | -1.60541000 | 2.87699800  | 5.03901600  |
| C | 0.97808700  | 3.85390700  | -0.77968500 |
| C | -0.30049500 | 3.95819400  | -1.35673900 |
| C | 1.88678000  | 4.90406400  | -0.98085500 |
| C | -0.66492100 | 5.08283300  | -2.09354600 |
| H | -1.01196500 | 3.14661700  | -1.22549200 |
| C | 1.52600300  | 6.02664500  | -1.73285800 |
| H | 2.88363800  | 4.86069700  | -0.55413300 |
| C | 0.25053200  | 6.12179900  | -2.28749900 |
| H | -1.66103400 | 5.14652800  | -2.52380600 |
| H | 2.24594500  | 6.82784000  | -1.87962700 |
| H | -0.02906800 | 6.99542500  | -2.87014100 |
| C | -2.15771800 | -1.15045900 | -1.76885400 |
| C | -1.71165300 | 0.07011500  | -2.19984900 |
| C | -0.33193300 | 0.09798900  | -2.61405500 |
| C | 0.30377400  | -1.16388600 | -2.45006200 |
| S | -0.87422600 | -2.37110600 | -1.86960500 |

|    |             |             |             |
|----|-------------|-------------|-------------|
| H  | -2.35642100 | 0.94285600  | -2.24875900 |
| H  | 0.04804000  | 0.86622300  | -3.28087500 |
| C  | -3.46184400 | -1.50468300 | -1.24906500 |
| C  | -4.04977400 | -2.74764500 | -1.14951700 |
| S  | -4.54772300 | -0.26774200 | -0.61910200 |
| C  | -5.36352600 | -2.72942200 | -0.59603700 |
| H  | -3.55946100 | -3.65473200 | -1.48639000 |
| C  | -5.76113100 | -1.46416200 | -0.27491200 |
| H  | -5.97974200 | -3.60929200 | -0.45564500 |
| Br | -7.47120400 | -0.94389900 | 0.47703800  |
| H  | 1.10572900  | -1.54408600 | -3.07270900 |

-----

**TS1**

Energy (RB3LYP) = -2432.115962805660 A.U.

Free Energy = -2431.692945534719 A.U.

-----

|    |             |             |             |
|----|-------------|-------------|-------------|
| Pd | -0.38283300 | -0.63437500 | 0.11397500  |
| P  | 0.49484200  | 1.17778300  | 1.48216300  |
| P  | -2.66908800 | 0.10509600  | 0.19108000  |
| C  | -3.07831700 | 0.95883000  | 1.80154200  |
| H  | -4.12385100 | 1.28956400  | 1.78409700  |
| H  | -3.02291500 | 0.17228700  | 2.56488400  |
| C  | -0.76946300 | 1.75609100  | 2.73807300  |
| H  | -0.86150300 | 0.93249000  | 3.45726800  |
| H  | -0.35214900 | 2.60120500  | 3.29871400  |
| C  | -2.16138700 | 2.13604300  | 2.19188300  |
| H  | -2.67526200 | 2.69750400  | 2.98371100  |
| H  | -2.06048600 | 2.83404700  | 1.35121900  |
| C  | 0.87768500  | 2.70033800  | 0.50863300  |
| C  | 1.34767100  | 2.53419800  | -0.80495800 |
| C  | 0.72250600  | 4.00554800  | 1.00484900  |
| C  | 1.66657400  | 3.63984700  | -1.59420500 |
| H  | 1.46118000  | 1.53163800  | -1.20732200 |
| C  | 1.03112300  | 5.11215900  | 0.21087500  |
| H  | 0.36280600  | 4.17108500  | 2.01610300  |
| C  | 1.50616500  | 4.93164100  | -1.08930300 |
| H  | 2.03465700  | 3.49000100  | -2.60550100 |
| H  | 0.90084000  | 6.11460100  | 0.61038100  |
| H  | 1.74684500  | 5.79334000  | -1.70620700 |
| C  | 1.96591100  | 0.94568800  | 2.57628400  |
| C  | 2.09537300  | -0.28872300 | 3.23561900  |
| C  | 2.94428200  | 1.93062700  | 2.78250200  |
| C  | 3.16621000  | -0.52173600 | 4.09956100  |
| H  | 1.37021000  | -1.07793100 | 3.05561000  |
| C  | 4.01901300  | 1.69047300  | 3.64056500  |
| H  | 2.87428200  | 2.88440400  | 2.26914200  |
| C  | 4.13066700  | 0.46706900  | 4.30392400  |
| H  | 3.25294500  | -1.48269000 | 4.59938200  |
| H  | 4.77175300  | 2.46089500  | 3.78706800  |
| H  | 4.97032200  | 0.28165300  | 4.96854300  |
| C  | -3.18224000 | 1.30748700  | -1.11185900 |
| C  | -2.58137500 | 1.18069400  | -2.37532000 |

|    |             |             |             |
|----|-------------|-------------|-------------|
| C  | -4.12450800 | 2.33028100  | -0.91713500 |
| C  | -2.92758700 | 2.03754300  | -3.42020600 |
| H  | -1.83118300 | 0.40922100  | -2.53104200 |
| C  | -4.46356300 | 3.19503000  | -1.96023200 |
| H  | -4.60077900 | 2.46446300  | 0.04963300  |
| C  | -3.86909200 | 3.04820600  | -3.21445900 |
| H  | -2.45394100 | 1.92211300  | -4.39138200 |
| H  | -5.19200400 | 3.98364600  | -1.79055600 |
| H  | -4.13308600 | 3.72213300  | -4.02502500 |
| C  | -3.96889100 | -1.20900900 | 0.15362300  |
| C  | -5.30673600 | -0.95546600 | -0.18720100 |
| C  | -3.59242000 | -2.51326900 | 0.51190200  |
| C  | -6.24928400 | -1.98410000 | -0.16151800 |
| H  | -5.61326000 | 0.04217000  | -0.48845100 |
| C  | -4.53957700 | -3.53885800 | 0.54515100  |
| H  | -2.55434500 | -2.72655800 | 0.75676600  |
| C  | -5.86846100 | -3.27645400 | 0.20803400  |
| H  | -7.28095500 | -1.77664100 | -0.43385500 |
| H  | -4.23395900 | -4.54339400 | 0.82503200  |
| H  | -6.60395100 | -4.07641300 | 0.22553400  |
| C  | 2.97920700  | -1.39676100 | -2.24051700 |
| C  | 1.80221900  | -1.82965700 | -2.77060000 |
| C  | 0.81952700  | -2.08984100 | -1.75804500 |
| C  | 1.24835100  | -1.73555500 | -0.47679000 |
| S  | 2.94125800  | -1.22503800 | -0.49649600 |
| H  | 1.64711500  | -2.01071400 | -3.82799800 |
| H  | -0.09493600 | -2.64032300 | -1.94128600 |
| Br | 0.59379900  | -3.24472800 | 1.09766300  |
| Br | 4.59540100  | -0.96485300 | -3.23012100 |

-----

### TS2

Energy (RB3LYP) = -2971.322959624901 A.U.

Free Energy = -2970.845879558413 A.U.

-----

|    |             |             |             |
|----|-------------|-------------|-------------|
| Pd | -0.25730400 | -0.29994600 | 0.07433500  |
| P  | 0.60396400  | 1.89515900  | 0.79319300  |
| P  | -2.56373100 | 0.22156900  | 0.77190700  |
| C  | -2.73262000 | 1.57356800  | 2.05367500  |
| H  | -3.79832000 | 1.79416100  | 2.18796500  |
| H  | -2.36024000 | 1.17665600  | 3.00657500  |
| C  | -0.46556000 | 2.84447400  | 1.99924600  |
| H  | -0.28568400 | 2.37094800  | 2.97265200  |
| H  | -0.07434800 | 3.86523700  | 2.08731100  |
| C  | -1.97986700 | 2.87484500  | 1.71422900  |
| H  | -2.41215800 | 3.67383100  | 2.33109100  |
| H  | -2.17683000 | 3.16392800  | 0.67436700  |
| C  | 0.80453300  | 3.03823000  | -0.64165100 |
| C  | 1.54502800  | 2.56627100  | -1.74158900 |
| C  | 0.24854700  | 4.32506100  | -0.70974100 |
| C  | 1.73326800  | 3.36675900  | -2.86764200 |
| H  | 1.97209700  | 1.56761800  | -1.71375000 |
| C  | 0.42886400  | 5.12070000  | -1.84457200 |

|    |             |             |             |
|----|-------------|-------------|-------------|
| H  | -0.32891100 | 4.72277900  | 0.11832800  |
| C  | 1.17308400  | 4.64575400  | -2.92438100 |
| H  | 2.31426600  | 2.98801800  | -3.70435200 |
| H  | -0.01217500 | 6.11348500  | -1.87943900 |
| H  | 1.31485400  | 5.26638700  | -3.80509900 |
| C  | 2.22274200  | 2.01194200  | 1.67417000  |
| C  | 2.53890000  | 1.00878300  | 2.60390200  |
| C  | 3.11984100  | 3.07534100  | 1.49176600  |
| C  | 3.71769800  | 1.07582000  | 3.34762600  |
| H  | 1.86675000  | 0.16507000  | 2.73478800  |
| C  | 4.30360600  | 3.13517200  | 2.22901000  |
| H  | 2.89783000  | 3.85613300  | 0.77058900  |
| C  | 4.60347500  | 2.13836200  | 3.15974400  |
| H  | 3.95060200  | 0.28943200  | 4.06039500  |
| H  | 4.99218700  | 3.96188000  | 2.07465400  |
| H  | 5.52732200  | 2.18521800  | 3.73005500  |
| C  | -3.62036200 | 0.89060000  | -0.58921800 |
| C  | -3.00145200 | 1.38567100  | -1.74661100 |
| C  | -5.02008900 | 0.94919500  | -0.48929600 |
| C  | -3.76385300 | 1.94060600  | -2.77757500 |
| H  | -1.92021200 | 1.32660500  | -1.84086700 |
| C  | -5.78065600 | 1.49819400  | -1.52118400 |
| H  | -5.51754900 | 0.55227600  | 0.39167400  |
| C  | -5.15340600 | 1.99701800  | -2.66652300 |
| H  | -3.27013000 | 2.31936500  | -3.66840500 |
| H  | -6.86354100 | 1.53325600  | -1.43391200 |
| H  | -5.74808300 | 2.42170400  | -3.47103700 |
| C  | -3.59187200 | -1.13906200 | 1.47229100  |
| C  | -3.74637100 | -2.30406100 | 0.69962100  |
| C  | -4.18728700 | -1.09169900 | 2.74315700  |
| C  | -4.48878400 | -3.38116700 | 1.18070500  |
| H  | -3.28321800 | -2.37255200 | -0.27926300 |
| C  | -4.92483400 | -2.17635100 | 3.22509400  |
| H  | -4.08749900 | -0.21156700 | 3.36970400  |
| C  | -5.07990200 | -3.32221500 | 2.44506000  |
| H  | -4.59441300 | -4.27154600 | 0.56707900  |
| H  | -5.37920000 | -2.12030500 | 4.21098000  |
| H  | -5.65337700 | -4.16533700 | 2.82106700  |
| C  | 3.81010600  | -1.89350100 | -0.83491600 |
| C  | 3.35188000  | -1.44260900 | -2.03880300 |
| C  | 1.96127800  | -1.12548100 | -1.99829500 |
| C  | 1.34873900  | -1.32615000 | -0.76748300 |
| S  | 2.55919500  | -1.92109800 | 0.37845700  |
| H  | 3.96968800  | -1.36157800 | -2.92603700 |
| H  | 1.40645900  | -0.82128300 | -2.87946200 |
| Br | 5.61937300  | -2.48144600 | -0.43170600 |
| C  | -0.36981600 | -2.19123200 | -0.78846700 |
| C  | -0.46663600 | -3.42181600 | -0.15660600 |
| S  | -1.22117900 | -2.28101300 | -2.33708300 |
| C  | -1.18601400 | -4.40882200 | -0.89392000 |
| H  | 0.01558900  | -3.62850800 | 0.79252200  |
| C  | -1.64907900 | -3.95627100 | -2.09901200 |
| H  | -1.33245900 | -5.42569700 | -0.54253300 |

H -2.20186300 -4.49619900 -2.85669900

-----  
**TS3**

Energy (RB3LYP) = -2971.370871158452 A.U.

Free Energy = -2970.895715739267 A.U.  
-----

|    |             |             |             |
|----|-------------|-------------|-------------|
| Pd | -0.35301600 | -0.32944100 | -0.12539300 |
| P  | 0.91442600  | 0.70833100  | -1.77652500 |
| P  | -2.58198100 | 0.22888900  | -0.49963200 |
| C  | -2.70105000 | 0.62929900  | -2.33139900 |
| H  | -3.70005200 | 1.03349800  | -2.54018300 |
| H  | -2.61190400 | -0.31692500 | -2.87970400 |
| C  | -0.25383600 | 1.02744800  | -3.21065000 |
| H  | -0.38452900 | 0.05036200  | -3.69274700 |
| H  | 0.24205300  | 1.66288200  | -3.95566700 |
| C  | -1.63571800 | 1.62193300  | -2.85359600 |
| H  | -2.04016800 | 2.06368400  | -3.77426500 |
| H  | -1.52362800 | 2.45782200  | -2.15150000 |
| C  | 1.54325800  | 2.39384800  | -1.33124900 |
| C  | 2.20400800  | 2.51845300  | -0.09636700 |
| C  | 1.39030900  | 3.54391800  | -2.12160100 |
| C  | 2.71477700  | 3.74568500  | 0.32513200  |
| H  | 2.30876100  | 1.64494700  | 0.54203500  |
| C  | 1.89032300  | 4.77753900  | -1.69468900 |
| H  | 0.87680300  | 3.49153100  | -3.07683400 |
| C  | 2.55699600  | 4.88142400  | -0.47338800 |
| H  | 3.22464700  | 3.81326300  | 1.28270500  |
| H  | 1.75674500  | 5.65704900  | -2.31965100 |
| H  | 2.94470100  | 5.84158100  | -0.14292700 |
| C  | 2.34132500  | -0.02905800 | -2.71118400 |
| C  | 2.50376000  | -1.42192800 | -2.65908500 |
| C  | 3.24147100  | 0.72672700  | -3.47899200 |
| C  | 3.52909900  | -2.04792300 | -3.37104900 |
| H  | 1.82463400  | -2.01330300 | -2.04947100 |
| C  | 4.27298700  | 0.10246700  | -4.18221700 |
| H  | 3.14549700  | 1.80831500  | -3.51983500 |
| C  | 4.41706000  | -1.28635600 | -4.13288700 |
| H  | 3.63898800  | -3.12815500 | -3.32062900 |
| H  | 4.96586900  | 0.70131400  | -4.76832200 |
| H  | 5.22171300  | -1.77064300 | -4.68022400 |
| C  | -3.19017000 | 1.82169100  | 0.23384100  |
| C  | -2.26015600 | 2.67917500  | 0.84122700  |
| C  | -4.53653900 | 2.21876000  | 0.17744800  |
| C  | -2.66284300 | 3.90709500  | 1.37266200  |
| H  | -1.21721400 | 2.37539700  | 0.89331000  |
| C  | -4.94018600 | 3.44126000  | 0.71483300  |
| H  | -5.27512600 | 1.56479100  | -0.27851800 |
| C  | -4.00361600 | 4.28924300  | 1.31252500  |
| H  | -1.92836300 | 4.55991200  | 1.83720800  |
| H  | -5.98670400 | 3.73224200  | 0.66817700  |
| H  | -4.31993600 | 5.24096500  | 1.73176800  |
| C  | -4.04571300 | -0.87975100 | -0.23956300 |

|    |             |             |             |
|----|-------------|-------------|-------------|
| C  | -4.35919500 | -1.23886000 | 1.08510900  |
| C  | -4.80307000 | -1.44921400 | -1.27501500 |
| C  | -5.40058400 | -2.12035300 | 1.36532100  |
| H  | -3.78182200 | -0.81545200 | 1.90448400  |
| C  | -5.84041600 | -2.34466300 | -0.99532100 |
| H  | -4.59459100 | -1.19973100 | -2.31036400 |
| C  | -6.14501800 | -2.68137200 | 0.32269000  |
| H  | -5.62920700 | -2.37511600 | 2.39711000  |
| H  | -6.41228700 | -2.77469800 | -1.81388100 |
| H  | -6.95183000 | -3.37662900 | 0.53842400  |
| C  | 1.71408000  | -0.99576000 | 2.50344800  |
| C  | 0.34155700  | -1.10870600 | 2.38964500  |
| C  | -0.08857600 | -2.23515900 | 1.61519400  |
| C  | 0.98298200  | -2.94982900 | 1.14048600  |
| S  | 2.51648500  | -2.32069900 | 1.66761500  |
| H  | -0.34896900 | -0.41572800 | 2.85715000  |
| H  | -1.12194600 | -2.52708200 | 1.47746200  |
| C  | 2.49318300  | 0.01506300  | 3.19155900  |
| C  | 3.81314500  | 0.36933100  | 3.00244000  |
| S  | 1.78074600  | 0.99242100  | 4.46409100  |
| C  | 4.24806500  | 1.41988300  | 3.86094000  |
| H  | 4.44533000  | -0.09642400 | 2.25380700  |
| C  | 3.26184000  | 1.86513600  | 4.69848600  |
| H  | 5.25240100  | 1.82914600  | 3.84869400  |
| Br | 0.90291300  | -4.57881800 | 0.09815900  |
| H  | 3.31331400  | 2.64955100  | 5.44153900  |

-----  
**TS4**

Energy (RB3LYP) = -2971.368774987662 A.U.

Free Energy = -2970.892862621616 A.U.  
-----

|    |             |             |             |
|----|-------------|-------------|-------------|
| Pd | -0.42346800 | 0.31404000  | 0.21656000  |
| P  | 1.00298300  | 1.59081000  | -1.11962300 |
| P  | -2.43588600 | 0.04292800  | -0.90734700 |
| C  | -2.40870800 | 1.15017000  | -2.43074800 |
| H  | -3.14271200 | 0.77463600  | -3.15549500 |
| H  | -2.79091600 | 2.11867100  | -2.08515600 |
| C  | -0.08420500 | 2.36239400  | -2.44059300 |
| H  | -0.66842200 | 3.15885500  | -1.96325400 |
| H  | 0.55248700  | 2.83601600  | -3.19855900 |
| C  | -1.04745500 | 1.36659200  | -3.12979500 |
| H  | -1.26457300 | 1.76535500  | -4.12996100 |
| H  | -0.53756000 | 0.40949200  | -3.29668500 |
| C  | 2.23854400  | 0.70156400  | -2.18185400 |
| C  | 2.25891600  | -0.70030100 | -2.16023300 |
| C  | 3.13867700  | 1.37738200  | -3.02242300 |
| C  | 3.15082300  | -1.41281200 | -2.96663000 |
| H  | 1.57598100  | -1.22719100 | -1.49826100 |
| C  | 4.03173600  | 0.66734400  | -3.82444800 |
| H  | 3.15131100  | 2.46433200  | -3.04037300 |
| C  | 4.03786900  | -0.73047100 | -3.79963000 |
| H  | 3.15709900  | -2.49917300 | -2.93498800 |

|    |             |             |             |
|----|-------------|-------------|-------------|
| H  | 4.72605700  | 1.20374500  | -4.46650500 |
| H  | 4.73657100  | -1.28287800 | -4.42271900 |
| C  | 2.00357100  | 3.03766900  | -0.53156700 |
| C  | 1.75829300  | 4.37302200  | -0.88723500 |
| C  | 3.03228600  | 2.77508400  | 0.39329600  |
| C  | 2.51806700  | 5.41158900  | -0.33893600 |
| H  | 0.97545800  | 4.61849800  | -1.59765100 |
| C  | 3.79732600  | 3.80838100  | 0.93015900  |
| H  | 3.23459000  | 1.74814600  | 0.69003400  |
| C  | 3.54010300  | 5.13447400  | 0.56784400  |
| H  | 2.30981600  | 6.43870700  | -0.62846500 |
| H  | 4.59246000  | 3.58016300  | 1.63547600  |
| H  | 4.13063400  | 5.94235200  | 0.99167000  |
| C  | -2.81793400 | -1.63073400 | -1.60239600 |
| C  | -3.31032300 | -2.61904700 | -0.72915500 |
| C  | -2.54975200 | -1.99629700 | -2.93040400 |
| C  | -3.53977500 | -3.91993300 | -1.17229300 |
| H  | -3.52877900 | -2.36012600 | 0.30450300  |
| C  | -2.76946000 | -3.30451900 | -3.37289500 |
| H  | -2.16479900 | -1.26480100 | -3.63403800 |
| C  | -3.26657800 | -4.26996600 | -2.49846900 |
| H  | -3.93249500 | -4.66267000 | -0.48230300 |
| H  | -2.55379100 | -3.56395700 | -4.40641400 |
| H  | -3.43971800 | -5.28568500 | -2.84379600 |
| C  | -4.08574100 | 0.54204500  | -0.21752400 |
| C  | -5.30326900 | 0.24396000  | -0.85186400 |
| C  | -4.10858400 | 1.28995300  | 0.96883900  |
| C  | -6.51192300 | 0.68669600  | -0.31360700 |
| H  | -5.30816300 | -0.34597200 | -1.76460500 |
| C  | -5.31845800 | 1.73937300  | 1.50421900  |
| H  | -3.17183600 | 1.51147000  | 1.47449300  |
| C  | -6.52179400 | 1.43798500  | 0.86497000  |
| H  | -7.44676400 | 0.44570000  | -0.81365800 |
| H  | -5.31940500 | 2.31805800  | 2.42453500  |
| H  | -7.46418200 | 1.78170100  | 1.28376600  |
| C  | 2.53129400  | -2.50656100 | 1.56263300  |
| C  | 1.32585000  | -3.02137000 | 1.18177400  |
| C  | 0.23896200  | -2.19175900 | 1.59063200  |
| C  | 0.63246200  | -1.04149100 | 2.25338700  |
| S  | 2.38879800  | -1.01180200 | 2.43385600  |
| H  | 1.21022000  | -3.94656600 | 0.63052800  |
| H  | -0.80047000 | -2.43582900 | 1.40502200  |
| Br | 4.27586700  | -3.26532700 | 1.18942800  |
| C  | -0.19701700 | -0.03437300 | 2.90843400  |
| C  | 0.02949000  | 1.32508900  | 3.03812800  |
| S  | -1.63132300 | -0.50115400 | 3.81279500  |
| C  | -0.95990300 | 1.98670900  | 3.82226800  |
| H  | 0.87258500  | 1.82600400  | 2.57583100  |
| C  | -1.92165200 | 1.13640900  | 4.29872900  |
| H  | -0.95547900 | 3.05382300  | 4.01577000  |
| H  | -2.78752600 | 1.37547400  | 4.90196900  |

### TS5

Energy (RB3LYP) = -2971.370790507723 A.U.

Free Energy = -2970.896222148246 A.U.

|    |             |             |             |
|----|-------------|-------------|-------------|
| Pd | -1.02890100 | 0.35232600  | -0.65369600 |
| P  | -0.53361100 | 2.18680000  | 0.68087900  |
| P  | -2.92891200 | -0.67070000 | 0.21917900  |
| C  | -3.83297900 | 0.67267100  | 1.17250600  |
| H  | -4.66009500 | 0.21496800  | 1.73047800  |
| H  | -4.27572500 | 1.35565200  | 0.43654900  |
| C  | -2.13573300 | 2.64763300  | 1.54486400  |
| H  | -2.73408200 | 3.15867900  | 0.77997900  |
| H  | -1.93410600 | 3.40100200  | 2.31722100  |
| C  | -2.95095500 | 1.48222100  | 2.15182800  |
| H  | -3.62736600 | 1.92071400  | 2.89788900  |
| H  | -2.29392900 | 0.80558900  | 2.71272000  |
| C  | 0.64020000  | 1.85144400  | 2.07554000  |
| C  | 1.85707300  | 1.22838800  | 1.74597600  |
| C  | 0.39268300  | 2.15339700  | 3.42392000  |
| C  | 2.80399800  | 0.93700200  | 2.72717800  |
| H  | 2.05685400  | 0.96366800  | 0.71063100  |
| C  | 1.33556400  | 1.84990700  | 4.41041200  |
| H  | -0.53918600 | 2.62474500  | 3.72090100  |
| C  | 2.54444900  | 1.24522300  | 4.06521300  |
| H  | 3.73837400  | 0.45806900  | 2.44630700  |
| H  | 1.12156600  | 2.08733900  | 5.44954400  |
| H  | 3.27626600  | 1.00899300  | 4.83326600  |
| C  | -0.00892300 | 3.87795400  | 0.11210700  |
| C  | -0.15428500 | 4.18517100  | -1.24892000 |
| C  | 0.49749300  | 4.86309600  | 0.97487500  |
| C  | 0.18001700  | 5.45104600  | -1.73515700 |
| H  | -0.52313300 | 3.41824100  | -1.92627500 |
| C  | 0.84108300  | 6.12524900  | 0.48827600  |
| H  | 0.63623900  | 4.64142200  | 2.02963000  |
| C  | 0.67961300  | 6.42346700  | -0.86721300 |
| H  | 0.05955300  | 5.67368300  | -2.79244800 |
| H  | 1.23669300  | 6.87638200  | 1.16757900  |
| H  | 0.94873000  | 7.40658000  | -1.24485500 |
| C  | -2.68079300 | -1.92803900 | 1.56156900  |
| C  | -1.39387700 | -2.09219900 | 2.09645400  |
| C  | -3.73177100 | -2.69962000 | 2.08457100  |
| C  | -1.16278500 | -2.99877100 | 3.13423000  |
| H  | -0.57455900 | -1.50276900 | 1.69144600  |
| C  | -3.49981100 | -3.61069800 | 3.11529900  |
| H  | -4.73405700 | -2.59648900 | 1.67722400  |
| C  | -2.21469000 | -3.76122100 | 3.64373100  |
| H  | -0.15995600 | -3.11145600 | 3.53797300  |
| H  | -4.32231200 | -4.20488500 | 3.50580400  |
| H  | -2.03535300 | -4.47258000 | 4.44582700  |
| C  | -4.29634700 | -1.44584800 | -0.76595400 |
| C  | -3.98078300 | -2.59575800 | -1.51439700 |
| C  | -5.59292500 | -0.92008600 | -0.87862100 |
| C  | -4.92937100 | -3.20691200 | -2.33105500 |



|    |             |             |             |
|----|-------------|-------------|-------------|
| H  | -2.97964600 | -3.01702400 | -1.44928200 |
| C  | -6.54210900 | -1.52494700 | -1.70906500 |
| H  | -5.87841700 | -0.03568200 | -0.31822200 |
| C  | -6.21648600 | -2.66970100 | -2.43498900 |
| H  | -4.66413100 | -4.09970900 | -2.89171400 |
| H  | -7.53974900 | -1.09890500 | -1.78174700 |
| H  | -6.95545400 | -3.13927500 | -3.07868600 |
| C  | 1.70063200  | -0.39197500 | -2.45576000 |
| C  | 0.49290200  | -1.05862700 | -2.33790600 |
| C  | -0.54806100 | -0.49128100 | -3.13961300 |
| C  | -0.12539000 | 0.60745000  | -3.84830600 |
| S  | 1.55878000  | 0.93838600  | -3.59153000 |
| H  | 0.36284000  | -1.94384000 | -1.72495100 |
| H  | -1.54679200 | -0.90525200 | -3.21231100 |
| C  | 2.96398200  | -0.67675700 | -1.80469000 |
| C  | 4.04451200  | 0.15540100  | -1.60259700 |
| S  | 3.29361500  | -2.27549300 | -1.14641200 |
| C  | 5.13316900  | -0.46102700 | -0.91872900 |
| H  | 4.05309200  | 1.19305300  | -1.91883700 |
| C  | 4.86368900  | -1.76245200 | -0.60664400 |
| H  | 6.05962700  | 0.04101800  | -0.66778700 |
| Br | 6.02620200  | -2.99030400 | 0.33860800  |
| H  | -0.69782900 | 1.21909900  | -4.53250300 |

-----

## CPs and TSs with Pd(0)NHC

### Pd(0)NHC

Energy (RB3LYP) = -1286.796900951381 A.U.

Free Energy = -1286.290512363789 A.U.

|   |             |             |             |
|---|-------------|-------------|-------------|
| C | -0.67688300 | 0.00655100  | 2.21915300  |
| C | 0.67729900  | 0.00477900  | 2.21891000  |
| H | -1.38887300 | 0.00999400  | 3.02960700  |
| H | 1.38958100  | 0.00633400  | 3.02911000  |
| N | -1.07857400 | 0.00288600  | 0.88437000  |
| N | 1.07848400  | 0.00003100  | 0.88399000  |
| C | -0.00020100 | -0.00142800 | 0.02836600  |
| C | 2.46089200  | -0.00033800 | 0.47423600  |
| C | 3.11615800  | -1.23510700 | 0.29549300  |
| C | 3.11728300  | 1.23429800  | 0.29921600  |
| C | 4.46599000  | -1.20612500 | -0.07615400 |
| C | 4.46725200  | 1.20533400  | -0.07199800 |
| C | 5.13760000  | -0.00041500 | -0.25864700 |
| H | 4.99636900  | -2.14206800 | -0.22809400 |
| H | 4.99859800  | 2.14129200  | -0.22050600 |
| H | 6.18539700  | -0.00046500 | -0.54786200 |
| C | -2.46116600 | 0.00390800  | 0.47512500  |
| C | -3.11924000 | -1.23029700 | 0.30301400  |
| C | -3.11468900 | 1.23909400  | 0.29311800  |
| C | -4.46893600 | -1.20036800 | -0.06906900 |
| C | -4.46438000 | 1.21104100  | -0.07911200 |
| C | -5.13751400 | 0.00582400  | -0.25914300 |
| H | -5.00142000 | -2.13596300 | -0.21568300 |
| H | -4.99335100 | 2.14734700  | -0.23365400 |
| H | -6.18511900 | 0.00660400  | -0.54905100 |
| C | 2.40723200  | -2.57430400 | 0.46922700  |
| C | 3.09299000  | -3.45415900 | 1.53205200  |
| C | 2.28416300  | -3.31185200 | -0.87824000 |
| H | 1.39000600  | -2.37520000 | 0.81813300  |
| H | 3.15471900  | -2.94041400 | 2.49842000  |
| H | 2.52895500  | -4.38324200 | 1.67678700  |
| H | 4.11196600  | -3.72995000 | 1.23613900  |
| H | 1.73717300  | -2.69558200 | -1.60036400 |
| H | 3.26966800  | -3.54590900 | -1.29887400 |
| H | 1.74187200  | -4.25647000 | -0.74804400 |
| C | 2.40990400  | 2.57371000  | 0.47800500  |
| C | 2.29955900  | 3.32369800  | -0.86366600 |
| C | 3.08946600  | 3.44232600  | 1.55405100  |
| H | 1.38934400  | 2.37428100  | 0.81683200  |
| H | 1.75802500  | 2.71550900  | -1.59650600 |
| H | 1.75761300  | 4.26790500  | -0.72925700 |
| H | 3.28878700  | 3.56042800  | -1.27388100 |
| H | 3.14070000  | 2.92037100  | 2.51663100  |
| H | 4.11214500  | 3.71612700  | 1.26923800  |
| H | 2.52787700  | 4.37245500  | 1.70164100  |
| C | -2.41365700 | -2.57021200 | 0.48483800  |
| C | -2.30022400 | -3.32075800 | -0.85625700 |

|    |             |             |             |
|----|-------------|-------------|-------------|
| C  | -3.09697200 | -3.43791600 | 1.55922300  |
| H  | -1.39390900 | -2.37148000 | 0.82653300  |
| H  | -1.75645600 | -2.71286600 | -1.58771700 |
| H  | -1.75913100 | -4.26523100 | -0.72023600 |
| H  | -3.28857800 | -3.55697500 | -1.26889400 |
| H  | -3.15131900 | -2.91537600 | 2.52131100  |
| H  | -4.11872400 | -3.71190900 | 1.27123900  |
| H  | -2.53598000 | -4.36802400 | 1.70918900  |
| C  | -2.40408700 | 2.57788100  | 0.46345800  |
| C  | -3.09016800 | 3.46245900  | 1.52216600  |
| C  | -2.27804000 | 3.31049500  | -0.88643100 |
| H  | -1.38766700 | 2.37868200  | 0.81464600  |
| H  | -3.15414300 | 2.95223800  | 2.49025800  |
| H  | -2.52499300 | 4.39122100  | 1.66451900  |
| H  | -4.10829500 | 3.73871700  | 1.22375500  |
| H  | -1.73126100 | 2.69080000  | -1.60573800 |
| H  | -3.26267000 | 3.54459400  | -1.30907400 |
| H  | -1.73440800 | 4.25470500  | -0.75888500 |
| Pd | 0.00000700  | -0.00981800 | -1.93969100 |

### CP1

Energy (RB3LYP) = -1864.935856787257 A.U.

Free Energy = -1864.398111939889 A.U.

|    |             |             |             |
|----|-------------|-------------|-------------|
| Pd | 0.25547500  | -0.25065900 | -0.60068500 |
| C  | 3.84009400  | -0.23245600 | -0.34089500 |
| C  | 3.21371900  | 0.84150600  | -0.89061100 |
| C  | 2.09777800  | 0.46398600  | -1.72346200 |
| C  | 1.87243500  | -0.93628000 | -1.71572400 |
| S  | 3.11629500  | -1.77285400 | -0.74004300 |
| H  | 3.52352100  | 1.86766600  | -0.73212500 |
| H  | 1.70561200  | 1.11912700  | -2.49295600 |
| Br | 1.22304200  | -1.92825700 | -3.33166700 |
| Br | 5.30971800  | -0.16136600 | 0.92765200  |
| C  | -3.01442100 | 1.67626400  | 1.49787200  |
| C  | -3.27242900 | 0.38431600  | 1.81651100  |
| H  | -3.52765500 | 2.58997200  | 1.75358000  |
| H  | -4.05710900 | -0.06185100 | 2.40713800  |
| N  | -1.86844200 | 1.66901900  | 0.70621300  |
| N  | -2.27724800 | -0.37892500 | 1.21203000  |
| C  | -1.39040500 | 0.39906800  | 0.51473400  |
| C  | -2.19716900 | -1.81675800 | 1.31605900  |
| C  | -2.88528800 | -2.60375700 | 0.37053300  |
| C  | -1.45034600 | -2.37891300 | 2.37113700  |
| C  | -2.80574700 | -3.99525400 | 0.50665000  |
| C  | -1.40363700 | -3.77582500 | 2.45737000  |
| C  | -2.07284400 | -4.57770000 | 1.53694200  |
| H  | -3.32257400 | -4.63011000 | -0.20734400 |
| H  | -0.83197500 | -4.24049900 | 3.25566700  |
| H  | -2.02195400 | -5.65997300 | 1.62206400  |
| C  | -1.26412100 | 2.86552200  | 0.17156500  |
| C  | -1.65621700 | 3.31155300  | -1.10613300 |

|   |             |             |             |
|---|-------------|-------------|-------------|
| C | -0.32015300 | 3.55513600  | 0.95833800  |
| C | -1.06172400 | 4.48242300  | -1.59337300 |
| C | 0.23956600  | 4.72224600  | 0.42352900  |
| C | -0.12351500 | 5.18225300  | -0.83942400 |
| H | -1.33880700 | 4.84993600  | -2.57743700 |
| H | 0.97132500  | 5.27617400  | 1.00488400  |
| H | 0.32434600  | 6.08958700  | -1.23634900 |
| C | -3.70190300 | -1.99992300 | -0.76782900 |
| C | -5.20173600 | -2.32118000 | -0.61145300 |
| C | -3.17650200 | -2.44798400 | -2.14512500 |
| H | -3.59436400 | -0.91227400 | -0.72258100 |
| H | -5.59067300 | -1.96377700 | 0.34909100  |
| H | -5.77994000 | -1.84309200 | -1.41102100 |
| H | -5.38854500 | -3.40020600 | -0.66499500 |
| H | -2.12082500 | -2.18553200 | -2.26837200 |
| H | -3.27531900 | -3.53116400 | -2.28299600 |
| H | -3.74734900 | -1.95915800 | -2.94378900 |
| C | -0.70611400 | -1.53201600 | 3.39866700  |
| C | 0.81374300  | -1.77754400 | 3.33601100  |
| C | -1.25254000 | -1.76284700 | 4.82146800  |
| H | -0.87062000 | -0.47879100 | 3.15352000  |
| H | 1.20235000  | -1.56531400 | 2.33459600  |
| H | 1.33231700  | -1.12752500 | 4.05096700  |
| H | 1.06508800  | -2.81505900 | 3.58626300  |
| H | -2.32671700 | -1.55157100 | 4.87788400  |
| H | -1.09928100 | -2.79763400 | 5.14948100  |
| H | -0.73956300 | -1.10897500 | 5.53658700  |
| C | -2.68399800 | 2.57351300  | -1.95838300 |
| C | -2.04925400 | 2.01734900  | -3.24767900 |
| C | -3.90293900 | 3.46298600  | -2.27269900 |
| H | -3.04678400 | 1.71569700  | -1.38488900 |
| H | -1.23001600 | 1.33033100  | -3.01045300 |
| H | -2.79680700 | 1.46887300  | -3.83333100 |
| H | -1.65400300 | 2.82108700  | -3.88049300 |
| H | -4.37524100 | 3.83417900  | -1.35584000 |
| H | -3.62431900 | 4.33270000  | -2.87914000 |
| H | -4.65282600 | 2.89430000  | -2.83507000 |
| C | 0.09984100  | 3.08124000  | 2.34643100  |
| C | -0.30389000 | 4.09817500  | 3.43247200  |
| C | 1.60711400  | 2.76851300  | 2.40814600  |
| H | -0.42864800 | 2.14789200  | 2.56032500  |
| H | -1.38284500 | 4.29127100  | 3.42002100  |
| H | -0.03803200 | 3.71992400  | 4.42661500  |
| H | 0.20716700  | 5.05830800  | 3.29452800  |
| H | 1.87947400  | 2.00966600  | 1.66793900  |
| H | 2.21327600  | 3.66316300  | 2.22161500  |
| H | 1.87457900  | 2.38913300  | 3.40157600  |

**CP2**

Energy (RB3LYP) = -1864.953568775482 A.U.

Free Energy = -1864.414845163126 A.U.

|    |             |             |             |
|----|-------------|-------------|-------------|
| Pd | -0.42500300 | -0.30277100 | -0.09501500 |
| C  | -4.78542000 | -1.06613900 | -0.34558500 |
| C  | -4.20211300 | -2.30258900 | -0.39283400 |
| C  | -2.77715100 | -2.21143200 | -0.44192600 |
| C  | -2.29098200 | -0.92259200 | -0.36862200 |
| S  | -3.61997600 | 0.22319500  | -0.35160800 |
| H  | -4.75993500 | -3.23198100 | -0.39698900 |
| H  | -2.13216400 | -3.07865800 | -0.54062400 |
| Br | -0.15119000 | -0.32951700 | -2.59767400 |
| Br | -6.69136000 | -0.70496200 | -0.22956600 |
| C  | 3.74022800  | 0.33237500  | 1.00086800  |
| C  | 3.30726600  | 1.61700400  | 1.02332000  |
| H  | 4.70274400  | -0.09900800 | 1.22473400  |
| H  | 3.81447000  | 2.53646200  | 1.26886300  |
| N  | 2.65459600  | -0.44853300 | 0.61556100  |
| N  | 1.96661600  | 1.59072500  | 0.65261800  |
| C  | 1.54313800  | 0.31650400  | 0.40322400  |
| C  | 1.13063000  | 2.76936500  | 0.58422100  |
| C  | 1.18796900  | 3.57638100  | -0.57069000 |
| C  | 0.31164600  | 3.07890100  | 1.68930400  |
| C  | 0.38276500  | 4.72189300  | -0.59370700 |
| C  | -0.48375300 | 4.22810900  | 1.60292600  |
| C  | -0.44897400 | 5.04306100  | 0.47530400  |
| H  | 0.40145900  | 5.36652500  | -1.46685500 |
| H  | -1.13660900 | 4.48840000  | 2.43085300  |
| H  | -1.07238600 | 5.93190300  | 0.42918900  |
| C  | 2.71324000  | -1.88989700 | 0.50117800  |
| C  | 3.26252000  | -2.45550000 | -0.66889500 |
| C  | 2.25504500  | -2.67241500 | 1.58049400  |
| C  | 3.33848000  | -3.85216700 | -0.73254000 |
| C  | 2.34569900  | -4.06450400 | 1.45495000  |
| C  | 2.88207400  | -4.65040700 | 0.31277200  |
| H  | 3.75534700  | -4.32139200 | -1.61803500 |
| H  | 1.99504300  | -4.69583000 | 2.26634500  |
| H  | 2.94587300  | -5.73257800 | 0.23646800  |
| C  | 2.10171900  | 3.26220200  | -1.75202200 |
| C  | 3.33664900  | 4.18783000  | -1.74691500 |
| C  | 1.36786400  | 3.33826200  | -3.10340800 |
| H  | 2.45438700  | 2.23229200  | -1.64168200 |
| H  | 3.90650000  | 4.10363000  | -0.81416500 |
| H  | 4.00718600  | 3.93476100  | -2.57649600 |
| H  | 3.04200000  | 5.23790700  | -1.86133900 |
| H  | 0.50095800  | 2.67184300  | -3.11751900 |
| H  | 1.03297200  | 4.35686500  | -3.33199100 |
| H  | 2.04471100  | 3.02914200  | -3.90827000 |
| C  | 0.25712600  | 2.21347600  | 2.94489100  |
| C  | -1.08492700 | 1.46296000  | 3.04204100  |
| C  | 0.52818200  | 3.02859300  | 4.22430900  |
| H  | 1.04782100  | 1.46020000  | 2.87413400  |

|   |             |             |             |
|---|-------------|-------------|-------------|
| H | -1.26021500 | 0.84130100  | 2.15253500  |
| H | -1.10167900 | 0.80821200  | 3.92123500  |
| H | -1.92887200 | 2.15800700  | 3.11916500  |
| H | 1.48801300  | 3.55391900  | 4.16669500  |
| H | -0.25200300 | 3.77633500  | 4.40546800  |
| H | 0.55526900  | 2.36450300  | 5.09604400  |
| C | 3.79631000  | -1.60982700 | -1.82228000 |
| C | 3.31671300  | -2.10918000 | -3.19735400 |
| C | 5.33772800  | -1.53968300 | -1.77923700 |
| H | 3.40862200  | -0.59361100 | -1.70264300 |
| H | 2.22539000  | -2.16178600 | -3.23698600 |
| H | 3.65056100  | -1.41528600 | -3.97739000 |
| H | 3.72716500  | -3.09583200 | -3.44254700 |
| H | 5.70368600  | -1.12841800 | -0.83150500 |
| H | 5.77917200  | -2.53623900 | -1.90027700 |
| H | 5.71387000  | -0.90466100 | -2.58990600 |
| C | 1.68747600  | -2.07139100 | 2.86299200  |
| C | 2.54019900  | -2.45071800 | 4.09003600  |
| C | 0.21280000  | -2.46880900 | 3.06834100  |
| H | 1.71978500  | -0.98161600 | 2.77356000  |
| H | 3.58283600  | -2.13804100 | 3.96351000  |
| H | 2.14658500  | -1.96622600 | 4.99133200  |
| H | 2.53559600  | -3.53249200 | 4.26605000  |
| H | -0.40316900 | -2.17377900 | 2.21010400  |
| H | 0.10236700  | -3.55182100 | 3.19729300  |
| H | -0.19373800 | -1.98319100 | 3.96331700  |

-----

**CP3**

Energy (RB3LYP) = -2404.139237981727 A.U.

Free Energy = -2403.548542383114 A.U.

-----

|    |             |             |             |
|----|-------------|-------------|-------------|
| Pd | -0.47821900 | -0.76680500 | -0.71058800 |
| C  | 3.87749500  | -1.13137900 | 0.08167600  |
| C  | 3.77960900  | -0.25440500 | -0.95729400 |
| C  | 2.41562800  | -0.03241600 | -1.34761900 |
| C  | 1.50395000  | -0.72493100 | -0.59225600 |
| S  | 2.31806800  | -1.70802600 | 0.60503100  |
| H  | 4.63182500  | 0.22046800  | -1.42993500 |
| H  | 2.13963600  | 0.62700100  | -2.16231300 |
| C  | -1.60129900 | 3.02439500  | 1.22685800  |
| C  | -2.47587900 | 2.14919200  | 1.78085600  |
| H  | -1.49591900 | 4.09198200  | 1.33657200  |
| H  | -3.28945300 | 2.29399900  | 2.47409000  |
| N  | -0.76063200 | 2.28462100  | 0.39950200  |
| N  | -2.14777600 | 0.89622000  | 1.27599300  |
| C  | -1.08745000 | 0.95740800  | 0.41268200  |
| C  | -2.86560200 | -0.31684100 | 1.59632000  |
| C  | -3.94239300 | -0.70294300 | 0.77122600  |
| C  | -2.47824700 | -1.05240700 | 2.73567300  |
| C  | -4.62984200 | -1.87463600 | 1.11317600  |
| C  | -3.20656800 | -2.21048600 | 3.03264600  |
| C  | -4.26823300 | -2.62130400 | 2.23045100  |

|   |             |             |             |
|---|-------------|-------------|-------------|
| H | -5.46034400 | -2.20365900 | 0.49545600  |
| H | -2.93566300 | -2.80056500 | 3.90306200  |
| H | -4.81606700 | -3.52650200 | 2.47808900  |
| C | 0.30420400  | 2.89266000  | -0.36783800 |
| C | 0.07817100  | 3.19198500  | -1.72585700 |
| C | 1.51050700  | 3.20752300  | 0.29072200  |
| C | 1.12107700  | 3.80493100  | -2.43285000 |
| C | 2.51137200  | 3.83323200  | -0.46193300 |
| C | 2.32459400  | 4.12348800  | -1.81058400 |
| H | 0.98251300  | 4.04304600  | -3.48356200 |
| H | 3.45328500  | 4.08845800  | 0.01393600  |
| H | 3.11832300  | 4.60280400  | -2.37747800 |
| C | -4.38646200 | 0.10455600  | -0.44552700 |
| C | -5.81248300 | 0.65983900  | -0.25624800 |
| C | -4.27973300 | -0.71506600 | -1.74635600 |
| H | -3.71697500 | 0.96397100  | -0.54838000 |
| H | -5.88498700 | 1.27738200  | 0.64625900  |
| H | -6.09724100 | 1.27834700  | -1.11536400 |
| H | -6.54914600 | -0.14704100 | -0.16810800 |
| H | -3.26056400 | -1.08483800 | -1.91045000 |
| H | -4.94657900 | -1.58477300 | -1.73148100 |
| H | -4.55799100 | -0.09649200 | -2.60765500 |
| C | -1.33353400 | -0.61787400 | 3.64591900  |
| C | -0.29973200 | -1.73917300 | 3.85920900  |
| C | -1.87244700 | -0.09919800 | 4.99510600  |
| H | -0.80948400 | 0.21032600  | 3.15977900  |
| H | 0.10403900  | -2.09252300 | 2.90554000  |
| H | 0.53653300  | -1.36728900 | 4.46205900  |
| H | -0.73051400 | -2.59750500 | 4.38771900  |
| H | -2.56794400 | 0.73679900  | 4.85699000  |
| H | -2.40496000 | -0.88812300 | 5.53945100  |
| H | -1.04745200 | 0.24709900  | 5.62851500  |
| C | -1.24262200 | 2.90634500  | -2.43458500 |
| C | -1.06175200 | 1.91756600  | -3.60182200 |
| C | -1.91522400 | 4.21088200  | -2.90755900 |
| H | -1.92020400 | 2.43527800  | -1.71655800 |
| H | -0.63790800 | 0.97015000  | -3.25183900 |
| H | -2.02882300 | 1.70419800  | -4.07250300 |
| H | -0.39836600 | 2.32255900  | -4.37500900 |
| H | -2.07826700 | 4.90299200  | -2.07343600 |
| H | -1.30602000 | 4.72978100  | -3.65664900 |
| H | -2.88789700 | 3.99295300  | -3.36414200 |
| C | 1.74130700  | 2.92058800  | 1.77218700  |
| C | 1.67158400  | 4.22090700  | 2.60020700  |
| C | 3.06731300  | 2.18231000  | 2.03077700  |
| H | 0.93756200  | 2.26362000  | 2.11883400  |
| H | 0.70978500  | 4.73235200  | 2.47804900  |
| H | 1.80575900  | 4.00321700  | 3.66636000  |
| H | 2.45959800  | 4.92137700  | 2.29910700  |
| H | 3.13873100  | 1.26942200  | 1.43402200  |
| H | 3.93534100  | 2.80977400  | 1.79669700  |
| H | 3.14024900  | 1.90900200  | 3.08986700  |
| C | -0.25137100 | -2.43755000 | -1.78930500 |

|    |             |             |             |
|----|-------------|-------------|-------------|
| C  | -0.41063700 | -3.75180200 | -1.39598100 |
| S  | -0.04696000 | -2.38193200 | -3.52996200 |
| C  | -0.41898500 | -4.69081500 | -2.47444500 |
| H  | -0.51405800 | -4.04487700 | -0.35559300 |
| C  | -0.23435700 | -4.10111200 | -3.69657200 |
| H  | -0.55291500 | -5.76020000 | -2.34151800 |
| H  | -0.20543000 | -4.57297200 | -4.67038900 |
| Br | 5.51529900  | -1.70958200 | 0.96037300  |

-----

**CP4**

Energy (RB3LYP) = -2404.184875762993 A.U.

Free Energy = -2403.593611438597 A.U.

-----

|    |             |             |             |
|----|-------------|-------------|-------------|
| Pd | 0.25333000  | -0.28622300 | -0.41701600 |
| C  | 1.72791700  | -1.68763600 | -1.25176600 |
| C  | 2.05411200  | -0.40730700 | -1.76375100 |
| C  | 3.22062700  | 0.17242300  | -1.14551100 |
| C  | 3.77883700  | -0.64915600 | -0.21851300 |
| S  | 2.93626400  | -2.16144800 | -0.00853900 |
| H  | 1.66297400  | -0.03477900 | -2.70546600 |
| H  | 3.60149800  | 1.15622400  | -1.39130800 |
| Br | 5.27733200  | -0.20636900 | 0.93769100  |
| C  | -3.03790900 | 1.43933500  | 1.76257400  |
| C  | -2.66609000 | 2.53084400  | 1.05133600  |
| H  | -3.82518400 | 1.29323100  | 2.48539400  |
| H  | -3.06232900 | 3.53383200  | 1.02523700  |
| N  | -2.17037000 | 0.41268000  | 1.39668600  |
| N  | -1.58043200 | 2.14445700  | 0.26823100  |
| C  | -1.25105400 | 0.82699400  | 0.46557900  |
| C  | -0.89394700 | 3.03942300  | -0.63119000 |
| C  | 0.16648400  | 3.82057800  | -0.13024900 |
| C  | -1.32509200 | 3.11845300  | -1.97035500 |
| C  | 0.80512700  | 4.69341400  | -1.02009700 |
| C  | -0.64886500 | 4.00535000  | -2.81745900 |
| C  | 0.40591100  | 4.78521400  | -2.35075300 |
| H  | 1.62781100  | 5.30755400  | -0.66456700 |
| H  | -0.95380800 | 4.08502300  | -3.85717100 |
| H  | 0.91629000  | 5.46805400  | -3.02509400 |
| C  | -2.24890300 | -0.92283500 | 1.93707500  |
| C  | -1.50141700 | -1.23386800 | 3.09064800  |
| C  | -3.09353800 | -1.85896100 | 1.30673600  |
| C  | -1.61919800 | -2.52993000 | 3.60836900  |
| C  | -3.17656700 | -3.13861400 | 1.86946800  |
| C  | -2.44762800 | -3.47380600 | 3.00749600  |
| H  | -1.05321800 | -2.80172200 | 4.49487900  |
| H  | -3.82036800 | -3.88208100 | 1.40798600  |
| H  | -2.52597400 | -4.47318100 | 3.42777000  |
| C  | 0.62962400  | 3.74733000  | 1.32146800  |
| C  | 0.41861000  | 5.09118300  | 2.04673900  |
| C  | 2.09354100  | 3.27949400  | 1.42640600  |
| H  | 0.01836200  | 2.99963900  | 1.83467200  |
| H  | -0.63054200 | 5.40678500  | 2.00949100  |

|   |             |             |             |
|---|-------------|-------------|-------------|
| H | 0.71035100  | 5.00567000  | 3.10018600  |
| H | 1.02190000  | 5.88965600  | 1.59883600  |
| H | 2.22359900  | 2.30012400  | 0.95544400  |
| H | 2.77927500  | 3.98685200  | 0.94460200  |
| H | 2.39001600  | 3.19567200  | 2.47881400  |
| C | -2.47833800 | 2.28176800  | -2.51553000 |
| C | -1.98975500 | 1.28020600  | -3.57962300 |
| C | -3.61545900 | 3.16847100  | -3.05972800 |
| H | -2.89048600 | 1.69478800  | -1.68977900 |
| H | -1.23406400 | 0.60918600  | -3.15766800 |
| H | -2.82672700 | 0.67027000  | -3.94076600 |
| H | -1.55308100 | 1.79387800  | -4.44469000 |
| H | -3.98503700 | 3.86073100  | -2.29439400 |
| H | -3.28835100 | 3.76597500  | -3.91871800 |
| H | -4.45618000 | 2.54716800  | -3.39037800 |
| C | -0.59225100 | -0.22255400 | 3.78166600  |
| C | 0.87442700  | -0.69375900 | 3.79243600  |
| C | -1.08879100 | 0.09563900  | 5.20602700  |
| H | -0.62436300 | 0.70815100  | 3.20827500  |
| H | 1.23420100  | -0.87129700 | 2.77372400  |
| H | 1.51309500  | 0.06906800  | 4.25369900  |
| H | 0.99743800  | -1.62044000 | 4.36574000  |
| H | -2.11852100 | 0.47158100  | 5.19729600  |
| H | -1.06422500 | -0.79234000 | 5.84872400  |
| H | -0.45246400 | 0.85882500  | 5.66951100  |
| C | -3.91162300 | -1.52176600 | 0.06397300  |
| C | -5.42077400 | -1.50396600 | 0.37949900  |
| C | -3.59857100 | -2.47419100 | -1.10520800 |
| H | -3.63168200 | -0.51591300 | -0.26142500 |
| H | -5.65593700 | -0.78821700 | 1.17575900  |
| H | -5.99477700 | -1.22132500 | -0.51102400 |
| H | -5.77271200 | -2.49032900 | 0.70458400  |
| H | -2.53012400 | -2.46896800 | -1.34176100 |
| H | -3.89205300 | -3.50610100 | -0.87809200 |
| H | -4.15084200 | -2.16457400 | -2.00064700 |
| C | 0.95851700  | -2.74793900 | -1.90798700 |
| C | 0.31468000  | -3.82501900 | -1.33838700 |
| S | 0.81108900  | -2.81109400 | -3.65613200 |
| C | -0.30881600 | -4.68257300 | -2.29088800 |
| H | 0.26830400  | -3.97584700 | -0.26528700 |
| C | -0.14125400 | -4.25930800 | -3.58141900 |
| H | -0.86938800 | -5.57165500 | -2.02248200 |
| H | -0.51997800 | -4.70687200 | -4.49052200 |

-----

**CP5**

Energy (RB3LYP) = -2404.183502001091 A.U.

Free Energy = -2403.592823227298 A.U.

-----

|    |             |             |             |
|----|-------------|-------------|-------------|
| Pd | -0.28958200 | -0.47315100 | -0.66592000 |
| C  | 4.78434700  | -0.79154900 | -0.22919400 |
| C  | 4.42050200  | 0.44202100  | -0.68671900 |
| C  | 3.15326600  | 0.41383600  | -1.34082100 |

|   |             |             |             |
|---|-------------|-------------|-------------|
| C | 2.56692400  | -0.83097200 | -1.37182800 |
| S | 3.61163600  | -2.01821600 | -0.59823600 |
| H | 5.01822200  | 1.33547900  | -0.55282900 |
| H | 2.67028800  | 1.29583200  | -1.74642700 |
| C | -2.52689900 | 2.28095200  | 1.76854200  |
| C | -3.34920600 | 1.20861600  | 1.86467600  |
| H | -2.59550300 | 3.27215000  | 2.18865800  |
| H | -4.28319700 | 1.07087200  | 2.38658700  |
| N | -1.45774200 | 1.89067500  | 0.96511600  |
| N | -2.76285300 | 0.18922600  | 1.11705000  |
| C | -1.58082500 | 0.58920800  | 0.54558300  |
| C | -3.34445400 | -1.12330700 | 0.97565300  |
| C | -4.23998900 | -1.35770400 | -0.08654900 |
| C | -3.01569800 | -2.11565200 | 1.92059400  |
| C | -4.80711400 | -2.63429700 | -0.18674300 |
| C | -3.60890700 | -3.37542100 | 1.77089300  |
| C | -4.49583700 | -3.63518800 | 0.72957400  |
| H | -5.50021100 | -2.84654300 | -0.99605600 |
| H | -3.37077200 | -4.16345900 | 2.47981900  |
| H | -4.94644700 | -4.61962200 | 0.63280600  |
| C | -0.35662500 | 2.76055100  | 0.63009100  |
| C | -0.45187400 | 3.56194500  | -0.52546500 |
| C | 0.76323600  | 2.79570600  | 1.48510900  |
| C | 0.62271700  | 4.41245800  | -0.81478600 |
| C | 1.80846200  | 3.66506000  | 1.14864200  |
| C | 1.74237200  | 4.46569100  | 0.01147000  |
| H | 0.57975600  | 5.04203000  | -1.69915700 |
| H | 2.68616000  | 3.71296100  | 1.78702200  |
| H | 2.56421400  | 5.13480800  | -0.23040500 |
| C | -4.60030900 | -0.28710600 | -1.11155500 |
| C | -6.10106600 | 0.06074900  | -1.06074900 |
| C | -4.16860700 | -0.69939600 | -2.53195000 |
| H | -4.04526000 | 0.62125400  | -0.86138900 |
| H | -6.40155100 | 0.39434100  | -0.06072900 |
| H | -6.33011000 | 0.86500200  | -1.76998000 |
| H | -6.72428200 | -0.80190000 | -1.32463500 |
| H | -3.09294000 | -0.89996900 | -2.56699900 |
| H | -4.69815600 | -1.59901800 | -2.86853700 |
| H | -4.39392700 | 0.10420400  | -3.24371100 |
| C | -2.04191900 | -1.86880300 | 3.06856800  |
| C | -0.75782700 | -2.70337300 | 2.89661600  |
| C | -2.69729000 | -2.12313000 | 4.43985300  |
| H | -1.74515000 | -0.81643500 | 3.04050800  |
| H | -0.26742200 | -2.46003000 | 1.94808000  |
| H | -0.05463700 | -2.49341300 | 3.71169800  |
| H | -0.97376200 | -3.77861100 | 2.90925000  |
| H | -3.59521200 | -1.50911700 | 4.57504400  |
| H | -2.99018600 | -3.17246700 | 4.56203000  |
| H | -1.99527300 | -1.88065800 | 5.24634900  |
| C | -1.66681400 | 3.53701000  | -1.44765600 |
| C | -1.28668500 | 3.10102600  | -2.87545500 |
| C | -2.39437400 | 4.89617300  | -1.45261700 |
| H | -2.36823800 | 2.79155200  | -1.06257500 |

|    |             |             |             |
|----|-------------|-------------|-------------|
| H  | -0.81714500 | 2.11189600  | -2.86839500 |
| H  | -2.18247400 | 3.05145700  | -3.50637100 |
| H  | -0.59117200 | 3.80841900  | -3.34286500 |
| H  | -2.70367700 | 5.18899800  | -0.44256500 |
| H  | -1.75464200 | 5.69369300  | -1.84873600 |
| H  | -3.29134400 | 4.84633600  | -2.08129900 |
| C  | 0.86938200  | 1.93445200  | 2.73960300  |
| C  | 0.93163300  | 2.80113200  | 4.01293000  |
| C  | 2.06577300  | 0.96714900  | 2.66165000  |
| H  | -0.03349500 | 1.32091600  | 2.80557100  |
| H  | 0.05974100  | 3.46084700  | 4.09259400  |
| H  | 0.95876900  | 2.16489600  | 4.90548800  |
| H  | 1.82844500  | 3.43171800  | 4.02770500  |
| H  | 1.99156200  | 0.32785200  | 1.77643900  |
| H  | 3.01969600  | 1.50533200  | 2.61394400  |
| H  | 2.09110000  | 0.32533100  | 3.55059100  |
| C  | 1.30523400  | -1.24435200 | -1.99340700 |
| C  | 0.49286000  | -2.35241500 | -1.65493700 |
| S  | 0.99402000  | -0.77799700 | -3.69302000 |
| C  | -0.36464100 | -2.76597700 | -2.73625500 |
| H  | 0.68563300  | -2.98115900 | -0.79117300 |
| C  | -0.20872700 | -2.02637300 | -3.86949100 |
| H  | -1.07027900 | -3.58495300 | -2.64751000 |
| H  | -0.77136800 | -2.10071100 | -4.79144700 |
| Br | 6.39550200  | -1.22792500 | 0.76050400  |

-----

**CP6**

Energy (RB3LYP) = -2404.191235478396 A.U.

Free Energy = -2403.599784421540 A.U.

-----

|    |             |             |             |
|----|-------------|-------------|-------------|
| Pd | 0.01262800  | -0.14520400 | -0.71785400 |
| C  | -3.60680500 | 0.15529000  | -0.97934100 |
| C  | -2.81347200 | 1.23463900  | -1.28902200 |
| C  | -1.60474700 | 0.90793700  | -1.98478800 |
| C  | -1.45028800 | -0.48933200 | -2.15737800 |
| S  | -2.86662000 | -1.35817400 | -1.51466400 |
| H  | -3.09693500 | 2.25610100  | -1.05568000 |
| H  | -1.03770300 | 1.63852400  | -2.54946000 |
| Br | -0.59661200 | -1.27552400 | -3.79588000 |
| C  | 3.06998900  | -0.27641400 | 2.33339800  |
| C  | 3.15404300  | 1.04036800  | 2.02313400  |
| H  | 3.61992800  | -0.87969000 | 3.03857700  |
| H  | 3.79227300  | 1.82296500  | 2.40246800  |
| N  | 2.06527000  | -0.80918500 | 1.53038800  |
| N  | 2.19887000  | 1.27804900  | 1.03779100  |
| C  | 1.50606200  | 0.13999400  | 0.71413800  |
| C  | 1.97026200  | 2.57614000  | 0.45051600  |
| C  | 2.67252600  | 2.92569000  | -0.71985900 |
| C  | 1.06980700  | 3.45529200  | 1.08456800  |
| C  | 2.44104800  | 4.19794000  | -1.25792300 |
| C  | 0.87858600  | 4.71584600  | 0.50516800  |
| C  | 1.55401300  | 5.08545600  | -0.65483600 |

|   |             |             |             |                                           |             |             |             |
|---|-------------|-------------|-------------|-------------------------------------------|-------------|-------------|-------------|
| H | 2.96349600  | 4.49582400  | -2.16264100 | C                                         | -5.84137600 | -0.83351900 | -0.24509800 |
| H | 0.18890600  | 5.41559000  | 0.96888500  | S                                         | -5.31228400 | 1.45964700  | 0.81042600  |
| H | 1.38978500  | 6.06820100  | -1.08917000 | C                                         | -6.95283000 | -0.51205400 | 0.58423400  |
| C | 1.66595100  | -2.19604500 | 1.56644600  | H                                         | -5.77539400 | -1.73785700 | -0.84065800 |
| C | 2.33720700  | -3.11667300 | 0.73679200  | C                                         | -6.81850900 | 0.69750000  | 1.21033000  |
| C | 0.63376800  | -2.58072500 | 2.44578100  | H                                         | -7.82134500 | -1.15139900 | 0.70035200  |
| C | 1.94306600  | -4.45866100 | 0.80756000  | H                                         | -7.51146300 | 1.18778600  | 1.88085200  |
| C | 0.27910300  | -3.93503800 | 2.47358700  | -----                                     |             |             |             |
| C | 0.92490000  | -4.86619700 | 1.66489700  | <b>CP7</b>                                |             |             |             |
| H | 2.43881700  | -5.19262400 | 0.17860900  | Energy (RB3LYP) = -2404.189158462626 A.U. |             |             |             |
| H | -0.51718700 | -4.26262100 | 3.13589100  | Free Energy = -2403.598030229379 A.U.     |             |             |             |
| H | 0.63260400  | -5.91235400 | 1.70167000  | -----                                     |             |             |             |
| C | 3.65615900  | 1.98213200  | -1.40475300 | Pd                                        | 0.91485500  | -0.48847800 | -0.98000400 |
| C | 5.07813400  | 2.57622300  | -1.43836600 | C                                         | -2.49189400 | -1.41947000 | -1.64767400 |
| C | 3.17654100  | 1.59730800  | -2.81754200 | C                                         | -1.89640100 | -0.37413100 | -2.31199000 |
| H | 3.70266000  | 1.05883800  | -0.82022500 | C                                         | -0.54543700 | -0.63038600 | -2.72195200 |
| H | 5.43541500  | 2.81849500  | -0.43076600 | C                                         | -0.08897300 | -1.89628600 | -2.30994500 |
| H | 5.77853500  | 1.86019100  | -1.88425700 | S                                         | -1.37737300 | -2.77535400 | -1.47365600 |
| H | 5.11870000  | 3.49471500  | -2.03559000 | H                                         | -2.41348800 | 0.55372700  | -2.53445100 |
| H | 2.19349500  | 1.11655800  | -2.77652300 | H                                         | -0.04223400 | -0.02973700 | -3.47221700 |
| H | 3.10402600  | 2.47489900  | -3.47118400 | C                                         | 3.78901900  | 1.03841500  | 1.84583900  |
| H | 3.88145100  | 0.89550500  | -3.27934400 | C                                         | 2.89506600  | 2.05543200  | 1.89499700  |
| C | 0.31290400  | 3.08423900  | 2.35626300  | H                                         | 4.72281200  | 0.88387200  | 2.36343400  |
| C | -1.21090800 | 3.08667600  | 2.12925500  | H                                         | 2.88843700  | 2.97193900  | 2.46397700  |
| C | 0.70402500  | 4.00150200  | 3.53182600  | N                                         | 3.28644900  | 0.11231400  | 0.93465300  |
| H | 0.59240600  | 2.06345300  | 2.63184400  | N                                         | 1.86759000  | 1.72482100  | 1.01423600  |
| H | -1.48562000 | 2.39248800  | 1.32890700  | C                                         | 2.08810500  | 0.51705100  | 0.40088700  |
| H | -1.73112200 | 2.77797400  | 3.04387800  | C                                         | 0.71470200  | 2.56370100  | 0.79206300  |
| H | -1.57713700 | 4.08470400  | 1.85994800  | C                                         | 0.77873700  | 3.55236500  | -0.20981500 |
| H | 1.78302600  | 3.97070800  | 3.72265900  | C                                         | -0.42401000 | 2.37864000  | 1.60089900  |
| H | 0.43075700  | 5.04520300  | 3.33666300  | C                                         | -0.34830600 | 4.36287300  | -0.39392000 |
| H | 0.18815800  | 3.68868300  | 4.44734500  | C                                         | -1.52354000 | 3.21560900  | 1.37271400  |
| C | 3.45762600  | -2.70632400 | -0.21382900 | C                                         | -1.48943000 | 4.19766300  | 0.38655500  |
| C | 3.09998700  | -3.01813900 | -1.67973200 | H                                         | -0.33208900 | 5.13120600  | -1.16193700 |
| C | 4.79748100  | -3.35675500 | 0.18430200  | H                                         | -2.41983500 | 3.09228100  | 1.97385900  |
| H | 3.58609600  | -1.62258600 | -0.13919000 | H                                         | -2.35446100 | 4.83588600  | 0.22597000  |
| H | 2.17053100  | -2.51932400 | -1.97301500 | C                                         | 3.95779400  | -1.12138100 | 0.60450400  |
| H | 3.89966900  | -2.67170900 | -2.34549700 | C                                         | 4.87056400  | -1.13074400 | -0.46926700 |
| H | 2.97438100  | -4.09478200 | -1.84465400 | C                                         | 3.69411200  | -2.26634100 | 1.38267100  |
| H | 5.07693800  | -3.10234900 | 1.21330700  | C                                         | 5.51986800  | -2.33740300 | -0.75782300 |
| H | 4.75024300  | -4.44980400 | 0.11321400  | C                                         | 4.37255000  | -3.44589300 | 1.05108300  |
| H | 5.59988000  | -3.01466300 | -0.48002600 | C                                         | 5.27532200  | -3.48471000 | -0.00788500 |
| C | -0.09823500 | -1.58810000 | 3.34333800  | H                                         | 6.22473300  | -2.37826700 | -1.58353100 |
| C | 0.08759500  | -1.92993700 | 4.83477800  | H                                         | 4.18757600  | -4.34655700 | 1.62974100  |
| C | -1.59065900 | -1.49158100 | 2.97215400  | H                                         | 5.79009300  | -4.41114400 | -0.24905700 |
| H | 0.33701200  | -0.59807000 | 3.17973000  | C                                         | 2.00687200  | 3.75058900  | -1.09271100 |
| H | 1.14823700  | -1.96271900 | 5.10988000  | C                                         | 2.57870600  | 5.17594000  | -0.96729200 |
| H | -0.40287600 | -1.17567000 | 5.46141900  | C                                         | 1.69745000  | 3.39696700  | -2.56035000 |
| H | -0.35106700 | -2.90327800 | 5.08394300  | H                                         | 2.78270300  | 3.05775700  | -0.75444200 |
| H | -1.71314000 | -1.20140400 | 1.92360000  | H                                         | 2.82843800  | 5.41710500  | 0.07238600  |
| H | -2.10560200 | -2.44775100 | 3.12365000  | H                                         | 3.49131000  | 5.27346900  | -1.56721000 |
| H | -2.08942600 | -0.74146700 | 3.59766100  | H                                         | 1.86786100  | 5.93124500  | -1.32228400 |
| C | -4.85751700 | 0.13395500  | -0.24990600 |                                           |             |             |             |

|    |             |             |             |
|----|-------------|-------------|-------------|
| H  | 1.34940700  | 2.36151100  | -2.63801600 |
| H  | 0.92401400  | 4.05363200  | -2.97672600 |
| H  | 2.59770100  | 3.50691800  | -3.17736500 |
| C  | -0.49956500 | 1.30704100  | 2.68371100  |
| C  | -1.53920100 | 0.22759100  | 2.32496500  |
| C  | -0.77789800 | 1.91614200  | 4.07166700  |
| H  | 0.47369100  | 0.81044600  | 2.73661200  |
| H  | -1.29576100 | -0.23899500 | 1.36469900  |
| H  | -1.55628100 | -0.55412900 | 3.09425100  |
| H  | -2.54879700 | 0.64942700  | 2.25399800  |
| H  | -0.02265100 | 2.66374200  | 4.34088600  |
| H  | -1.75874300 | 2.40403500  | 4.11163000  |
| H  | -0.76839900 | 1.13218400  | 4.83810900  |
| C  | 5.15437700  | 0.10393900  | -1.31870500 |
| C  | 4.65565000  | -0.09135100 | -2.76371100 |
| C  | 6.64566000  | 0.49061600  | -1.28620400 |
| H  | 4.59153800  | 0.94154000  | -0.89690600 |
| H  | 3.58133600  | -0.30604200 | -2.77067100 |
| H  | 4.83145700  | 0.81666900  | -3.35347400 |
| H  | 5.17712800  | -0.91901300 | -3.25963700 |
| H  | 6.99349700  | 0.65932100  | -0.26051300 |
| H  | 7.27725000  | -0.28909600 | -1.72780800 |
| H  | 6.81129500  | 1.41206000  | -1.85689600 |
| C  | 2.70872100  | -2.26234600 | 2.54722400  |
| C  | 3.40581600  | -2.60281000 | 3.87909000  |
| C  | 1.51987200  | -3.20558600 | 2.28033800  |
| H  | 2.30024200  | -1.25222800 | 2.64198800  |
| H  | 4.22917200  | -1.91030700 | 4.08921700  |
| H  | 2.69135300  | -2.54270000 | 4.70857700  |
| H  | 3.81920000  | -3.61822000 | 3.87074000  |
| H  | 0.99525500  | -2.91941500 | 1.36279700  |
| H  | 1.84718100  | -4.24729300 | 2.17844100  |
| H  | 0.80606400  | -3.16039400 | 3.11173700  |
| C  | -3.82301100 | -1.48587500 | -1.07963900 |
| C  | -4.56559300 | -2.59365000 | -0.73109100 |
| S  | -4.72854400 | -0.01437500 | -0.73629700 |
| C  | -5.85546500 | -2.28967700 | -0.20661500 |
| H  | -4.20348000 | -3.60721400 | -0.86627400 |
| C  | -6.07951900 | -0.94406600 | -0.16193200 |
| H  | -6.57761400 | -3.03282100 | 0.10906000  |
| H  | 0.70068300  | -2.48103400 | -2.76901700 |
| Br | -7.69253800 | -0.05944200 | 0.44941200  |

**TS1**

Energy (RB3LYP) = -1864.930843925680 A.U.

Free Energy = -1864.393159271368 A.U.

|    |             |             |             |
|----|-------------|-------------|-------------|
| Pd | -0.23853900 | -0.28717400 | -0.51402900 |
| C  | -4.15437900 | -1.18767100 | -0.26353000 |
| C  | -3.46138000 | -2.36832900 | -0.22170400 |
| C  | -2.20524400 | -2.28074800 | -0.88400600 |
| C  | -1.92102300 | -0.99516200 | -1.35267100 |

|    |             |             |             |
|----|-------------|-------------|-------------|
| S  | -3.29784900 | 0.09306200  | -1.06884200 |
| H  | -3.83775700 | -3.26710500 | 0.25307100  |
| H  | -1.55712800 | -3.12765400 | -1.07363600 |
| Br | -0.91612700 | -0.75430000 | -3.29145200 |
| Br | -5.88339100 | -0.85688200 | 0.55403300  |
| C  | 3.44428600  | 0.50867900  | 1.63262400  |
| C  | 2.94571500  | 1.76809400  | 1.58506700  |
| H  | 4.35313500  | 0.11707500  | 2.06183800  |
| H  | 3.32969800  | 2.70196300  | 1.96458900  |
| N  | 2.52397400  | -0.30735900 | 0.97898100  |
| N  | 1.73383800  | 1.68967500  | 0.90348500  |
| C  | 1.44914300  | 0.40622800  | 0.51660200  |
| C  | 0.88831100  | 2.83062600  | 0.64411700  |
| C  | 1.09235200  | 3.57071400  | -0.53803100 |
| C  | -0.09374000 | 3.17595000  | 1.59453900  |
| C  | 0.27335200  | 4.68643800  | -0.75196400 |
| C  | -0.88397200 | 4.30111700  | 1.32909200  |
| C  | -0.70501400 | 5.04988700  | 0.16923000  |
| H  | 0.40379300  | 5.27678200  | -1.65439100 |
| H  | -1.65176400 | 4.59198300  | 2.04036600  |
| H  | -1.33061500 | 5.91865200  | -0.01786700 |
| C  | 2.69491400  | -1.73135100 | 0.81788200  |
| C  | 3.38815200  | -2.20702400 | -0.31337500 |
| C  | 2.18472100  | -2.59189200 | 1.81089100  |
| C  | 3.56139500  | -3.59180200 | -0.43129100 |
| C  | 2.38649700  | -3.96732400 | 1.64168500  |
| C  | 3.06677300  | -4.46494400 | 0.53356300  |
| H  | 4.09024200  | -3.99014700 | -1.29241500 |
| H  | 2.00433300  | -4.65708200 | 2.38893900  |
| H  | 3.21219500  | -5.53622100 | 0.42176900  |
| C  | 2.16339200  | 3.21058600  | -1.56311300 |
| C  | 3.25618200  | 4.29644500  | -1.63006400 |
| C  | 1.55821900  | 2.94341700  | -2.95450900 |
| H  | 2.64423900  | 2.28274200  | -1.24001100 |
| H  | 3.72223100  | 4.45764300  | -0.65104500 |
| H  | 4.04222200  | 4.00421200  | -2.33639900 |
| H  | 2.84673600  | 5.25662400  | -1.96553900 |
| H  | 0.81323800  | 2.14233500  | -2.91455100 |
| H  | 1.07525600  | 3.83805200  | -3.36485700 |
| H  | 2.34558300  | 2.64211300  | -3.65574600 |
| C  | -0.31373800 | 2.38286900  | 2.87899500  |
| C  | -1.74170100 | 1.80922800  | 2.95455900  |
| C  | 0.01304700  | 3.23097400  | 4.12430600  |
| H  | 0.37363800  | 1.53200700  | 2.87416600  |
| H  | -1.95789300 | 1.17963800  | 2.08523100  |
| H  | -1.85713200 | 1.19909500  | 3.85841900  |
| H  | -2.49566600 | 2.60421100  | 2.99273500  |
| H  | 1.04318100  | 3.60457300  | 4.09576000  |
| H  | -0.65306600 | 4.09792500  | 4.20593000  |
| H  | -0.10621000 | 2.63280200  | 5.03544200  |
| C  | 3.95616900  | -1.27917700 | -1.38295500 |
| C  | 3.38652500  | -1.59596500 | -2.77888300 |
| C  | 5.49775600  | -1.31681200 | -1.38908700 |



|   |             |             |             |
|---|-------------|-------------|-------------|
| H | 3.65485300  | -0.25635100 | -1.13901300 |
| H | 2.29403500  | -1.52845500 | -2.78474400 |
| H | 3.77640700  | -0.88248900 | -3.51466300 |
| H | 3.66842100  | -2.60146100 | -3.11307600 |
| H | 5.91012400  | -1.04540900 | -0.41033000 |
| H | 5.87272800  | -2.31548500 | -1.64258200 |
| H | 5.89389500  | -0.61362100 | -2.13118000 |
| C | 1.44301200  | -2.08170600 | 3.04257300  |
| C | 2.22665400  | -2.38750200 | 4.33457400  |
| C | 0.00902000  | -2.64026300 | 3.11526600  |
| H | 1.35859300  | -0.99433400 | 2.96097300  |
| H | 3.23265500  | -1.95330500 | 4.30509700  |
| H | 1.70375000  | -1.97412900 | 5.20512200  |
| H | 2.33490200  | -3.46700200 | 4.49282100  |
| H | -0.55598500 | -2.38469600 | 2.21279800  |
| H | 0.00502200  | -3.73140800 | 3.22371200  |
| H | -0.51743800 | -2.21939500 | 3.98022700  |

-----

**TS2**

Energy (RB3LYP) = -2404.130431088510 A.U.

Free Energy = -2403.539877770159 A.U.

-----

|    |             |             |             |
|----|-------------|-------------|-------------|
| Pd | 0.12211400  | -0.21156700 | 0.94369900  |
| C  | -4.23171500 | -0.30024000 | 0.15518300  |
| C  | -4.03925700 | 0.87673000  | 0.81697000  |
| C  | -2.71361900 | 0.98585400  | 1.34479400  |
| C  | -1.90045500 | -0.09377000 | 1.06751000  |
| S  | -2.79906800 | -1.29313300 | 0.14294700  |
| H  | -4.80559900 | 1.63389700  | 0.93721900  |
| H  | -2.38618300 | 1.83084400  | 1.93937900  |
| C  | 2.65863200  | 1.47813000  | -2.20150200 |
| C  | 3.03503900  | 0.17811300  | -2.29096400 |
| H  | 2.99195700  | 2.35503700  | -2.73383200 |
| H  | 3.76508400  | -0.31164600 | -2.91592100 |
| N  | 1.67522600  | 1.54027600  | -1.22047400 |
| N  | 2.26828600  | -0.52004100 | -1.36460100 |
| C  | 1.41391500  | 0.30780400  | -0.68558900 |
| C  | 2.37575000  | -1.94671400 | -1.16077800 |
| C  | 3.22230400  | -2.42592100 | -0.14092300 |
| C  | 1.65399400  | -2.80529300 | -2.01504900 |
| C  | 3.32371700  | -3.81414800 | 0.01491100  |
| C  | 1.79762600  | -4.18385000 | -1.81620100 |
| C  | 2.62012700  | -4.68565600 | -0.81118700 |
| H  | 3.96488000  | -4.21598500 | 0.79413100  |
| H  | 1.25546100  | -4.87311000 | -2.45683700 |
| H  | 2.71414000  | -5.75947700 | -0.67275700 |
| C  | 1.02185600  | 2.77115200  | -0.83678900 |
| C  | 1.57726500  | 3.53494100  | 0.20857700  |
| C  | -0.12327200 | 3.17734900  | -1.55104700 |
| C  | 0.94257400  | 4.73999900  | 0.53520900  |
| C  | -0.71288600 | 4.39357800  | -1.18536400 |
| C  | -0.18941700 | 5.16724400  | -0.15292400 |

|    |             |             |             |
|----|-------------|-------------|-------------|
| H  | 1.34303500  | 5.35146700  | 1.33877200  |
| H  | -1.59633800 | 4.73673600  | -1.71540800 |
| H  | -0.66528900 | 6.10669400  | 0.11580500  |
| C  | 4.03313900  | -1.50432900 | 0.76533400  |
| C  | 5.54575300  | -1.67001800 | 0.51553000  |
| C  | 3.68873000  | -1.71435800 | 2.25236400  |
| H  | 3.77437500  | -0.47041700 | 0.51871000  |
| H  | 5.80244500  | -1.47647600 | -0.53236400 |
| H  | 6.11425000  | -0.97042800 | 1.13960000  |
| H  | 5.88332400  | -2.68421000 | 0.75922300  |
| H  | 2.61870800  | -1.56878800 | 2.43596800  |
| H  | 3.95457700  | -2.72277600 | 2.59048900  |
| H  | 4.24290200  | -1.00003100 | 2.87273100  |
| C  | 0.76380700  | -2.28968800 | -3.14235400 |
| C  | -0.66426500 | -2.86058400 | -3.06661400 |
| C  | 1.39965600  | -2.57553800 | -4.51848900 |
| H  | 0.67850700  | -1.20397100 | -3.03814500 |
| H  | -1.13200500 | -2.62954700 | -2.10500200 |
| H  | -1.28452800 | -2.42363100 | -3.85790900 |
| H  | -0.67746900 | -3.94832300 | -3.20198300 |
| H  | 2.39633700  | -2.12715800 | -4.60364100 |
| H  | 1.50484900  | -3.65331200 | -4.69068400 |
| H  | 0.77451200  | -2.16722600 | -5.32127300 |
| C  | 2.83028100  | 3.11054400  | 0.96865000  |
| C  | 2.55446500  | 2.93898500  | 2.47455100  |
| C  | 3.99164500  | 4.09485400  | 0.72388000  |
| H  | 3.14542100  | 2.13474800  | 0.58735300  |
| H  | 1.76093100  | 2.20505200  | 2.64940500  |
| H  | 3.45957500  | 2.59246200  | 2.98772100  |
| H  | 2.25121000  | 3.88401700  | 2.94026100  |
| H  | 4.22006600  | 4.18792500  | -0.34413600 |
| H  | 3.75508900  | 5.09640600  | 1.10176700  |
| H  | 4.89780000  | 3.75099500  | 1.23650100  |
| C  | -0.70634600 | 2.36311200  | -2.70219500 |
| C  | -0.40570800 | 3.03643300  | -4.05721600 |
| C  | -2.21547700 | 2.10918300  | -2.53420000 |
| H  | -0.21798600 | 1.38422700  | -2.70421500 |
| H  | 0.67155200  | 3.16573200  | -4.21433200 |
| H  | -0.79797700 | 2.42945000  | -4.88177400 |
| H  | -0.87195900 | 4.02706100  | -4.11873600 |
| H  | -2.43341400 | 1.63629800  | -1.57243500 |
| H  | -2.79470200 | 3.03811300  | -2.59711500 |
| H  | -2.57369200 | 1.44711100  | -3.33102000 |
| C  | -0.77520400 | -0.79162600 | 2.64747100  |
| C  | -1.02646200 | -2.07686500 | 3.08989700  |
| S  | -0.57458600 | 0.27709800  | 4.03324700  |
| C  | -1.02486300 | -2.20966700 | 4.51092400  |
| H  | -1.23464500 | -2.89827300 | 2.41327000  |
| C  | -0.80187700 | -1.02586800 | 5.16156800  |
| H  | -1.19409000 | -3.15044200 | 5.02532400  |
| H  | -0.74533900 | -0.84653500 | 6.22749000  |
| Br | -5.86542500 | -0.87956400 | -0.72682800 |

-----

**TS3**

Energy (RB3LYP) = -2404.176355799019 A.U.

Free Energy = -2403.585333290901 A.U.

|    |             |             |             |
|----|-------------|-------------|-------------|
| Pd | -0.03683200 | 0.38354900  | -0.53931200 |
| C  | 2.84429800  | 1.07117000  | -1.40097700 |
| C  | 1.61968500  | 1.10516600  | -2.06860700 |
| C  | 0.79218700  | 2.22330100  | -1.70207700 |
| C  | 1.40540300  | 3.00178400  | -0.73715200 |
| S  | 2.99138700  | 2.44306900  | -0.31634100 |
| H  | 1.38323200  | 0.42926500  | -2.88328900 |
| H  | -0.12014400 | 2.51186400  | -2.21050300 |
| Br | 0.72220200  | 4.65279000  | 0.00241500  |
| C  | -2.08611500 | -2.31472800 | 2.09026500  |
| C  | -3.09051400 | -2.04450700 | 1.22237900  |
| H  | -2.04950600 | -2.94855000 | 2.96248800  |
| H  | -4.11072900 | -2.39296900 | 1.18216300  |
| N  | -0.98017700 | -1.58480100 | 1.65981600  |
| N  | -2.57492900 | -1.15584300 | 0.28158900  |
| C  | -1.25644700 | -0.85003400 | 0.53007200  |
| C  | -3.34753300 | -0.62876400 | -0.81554900 |
| C  | -4.08075500 | 0.55887700  | -0.62096100 |
| C  | -3.36345800 | -1.33405400 | -2.03560500 |
| C  | -4.83500800 | 1.04020600  | -1.69838300 |
| C  | -4.13364300 | -0.80780100 | -3.08015700 |
| C  | -4.86200200 | 0.36752200  | -2.91700600 |
| H  | -5.40665400 | 1.95656500  | -1.58043500 |
| H  | -4.16070300 | -1.32569400 | -4.03488800 |
| H  | -5.45322600 | 0.75912000  | -3.74081200 |
| C  | 0.29605000  | -1.62006200 | 2.33019300  |
| C  | 0.54899700  | -0.69143400 | 3.35932100  |
| C  | 1.23258100  | -2.60338700 | 1.95344000  |
| C  | 1.78629700  | -0.76594200 | 4.01114000  |
| C  | 2.45452100  | -2.63179300 | 2.63685800  |
| C  | 2.73146300  | -1.72427800 | 3.65566400  |
| H  | 2.01201700  | -0.06066100 | 4.80615000  |
| H  | 3.19948900  | -3.37394100 | 2.36385900  |
| H  | 3.68601400  | -1.76422900 | 4.17426000  |
| C  | -4.06925000 | 1.32570500  | 0.69748900  |
| C  | -5.48174200 | 1.43477100  | 1.30421000  |
| C  | -3.42115800 | 2.71341700  | 0.53059800  |
| H  | -3.45152500 | 0.76835000  | 1.40727300  |
| H  | -5.93084600 | 0.44615600  | 1.45456800  |
| H  | -5.43968700 | 1.94007500  | 2.27639300  |
| H  | -6.15597700 | 2.01198600  | 0.66054600  |
| H  | -2.39534800 | 2.61662400  | 0.16024400  |
| H  | -3.98480000 | 3.33917800  | -0.17203100 |
| H  | -3.39032400 | 3.23722500  | 1.49368100  |
| C  | -2.57084400 | -2.61924800 | -2.25226300 |
| C  | -1.44412300 | -2.40973400 | -3.28233000 |
| C  | -3.48401800 | -3.79494700 | -2.65006900 |
| H  | -2.09189400 | -2.88478200 | -1.30561700 |

|   |             |             |             |
|---|-------------|-------------|-------------|
| H | -0.76730000 | -1.61571100 | -2.94831000 |
| H | -0.86192300 | -3.33136000 | -3.40394600 |
| H | -1.84465800 | -2.13343900 | -4.26529400 |
| H | -4.26789000 | -3.96363000 | -1.90267600 |
| H | -3.97571700 | -3.61983600 | -3.61419200 |
| H | -2.89764900 | -4.71695700 | -2.74130900 |
| C | -0.45982400 | 0.37594400  | 3.77036900  |
| C | 0.08054300  | 1.79158400  | 3.49192100  |
| C | -0.88681500 | 0.21715300  | 5.24270600  |
| H | -1.35512100 | 0.24936700  | 3.15519100  |
| H | 0.32716100  | 1.90778000  | 2.43164400  |
| H | -0.67244600 | 2.54460100  | 3.75434100  |
| H | 0.98179300  | 2.00167100  | 4.08046400  |
| H | -1.30532400 | -0.77790500 | 5.43360800  |
| H | -0.04189200 | 0.35943000  | 5.92682600  |
| H | -1.64979200 | 0.96150100  | 5.49990600  |
| C | 0.96531300  | -3.60904900 | 0.83821800  |
| C | 1.04336000  | -5.06117700 | 1.34825800  |
| C | 1.91223600  | -3.38106300 | -0.35558800 |
| H | -0.05314500 | -3.44666700 | 0.47396100  |
| H | 0.34701300  | -5.23320300 | 2.17724400  |
| H | 0.79136300  | -5.76073300 | 0.54234900  |
| H | 2.05008200  | -5.31358000 | 1.70154800  |
| H | 1.80256500  | -2.36372900 | -0.74469600 |
| H | 2.96158700  | -3.52614000 | -0.07262400 |
| H | 1.68226900  | -4.08707900 | -1.16318200 |
| C | 3.93301700  | 0.13034500  | -1.54311000 |
| C | 4.97903800  | -0.12553900 | -0.67952000 |
| S | 4.07767500  | -0.87207700 | -2.97915000 |
| C | 5.88192700  | -1.11678300 | -1.15785100 |
| H | 5.07902500  | 0.36537200  | 0.28265600  |
| C | 5.52512400  | -1.61872700 | -2.37971000 |
| H | 6.75587500  | -1.44894800 | -0.60791800 |
| H | 6.01994200  | -2.38202400 | -2.96492000 |

**TS4**

Energy (RB3LYP) = -2404.178530147158 A.U.

Free Energy = -2403.583870033867 A.U.

|    |             |             |             |
|----|-------------|-------------|-------------|
| Pd | 0.02472400  | -0.37524000 | -0.64488100 |
| C  | -3.91166400 | -1.54210700 | -0.20657600 |
| C  | -3.03514300 | -2.45708900 | 0.30004500  |
| C  | -1.81750200 | -2.50256600 | -0.43916000 |
| C  | -1.77222400 | -1.60065300 | -1.50446900 |
| S  | -3.29661800 | -0.69724400 | -1.59720400 |
| H  | -3.24121800 | -3.07168800 | 1.16793500  |
| H  | -1.02157200 | -3.20984500 | -0.23821900 |
| Br | -5.65924100 | -1.10248300 | 0.51220300  |
| C  | 2.10461100  | 2.37889200  | 1.90451900  |
| C  | 2.82206500  | 1.26049600  | 2.16459800  |
| H  | 2.19246900  | 3.38587300  | 2.28133000  |
| H  | 3.66730300  | 1.09042300  | 2.81294200  |

|   |             |             |             |
|---|-------------|-------------|-------------|
| N | 1.12446400  | 2.01848900  | 0.98179100  |
| N | 2.26277500  | 0.24085100  | 1.39656800  |
| C | 1.19831200  | 0.68562900  | 0.64552400  |
| C | 2.76177900  | -1.11109900 | 1.39771700  |
| C | 3.75169600  | -1.46983800 | 0.46097100  |
| C | 2.26838500  | -2.01671300 | 2.35862000  |
| C | 4.23238000  | -2.78473900 | 0.49572000  |
| C | 2.78628400  | -3.31785800 | 2.35089900  |
| C | 3.75500500  | -3.70224400 | 1.42757700  |
| H | 4.99271400  | -3.09230800 | -0.21680600 |
| H | 2.42624600  | -4.03884000 | 3.07960400  |
| H | 4.14228400  | -4.71782400 | 1.43765500  |
| C | 0.15911900  | 2.94966700  | 0.45402600  |
| C | 0.49394600  | 3.69695000  | -0.69333400 |
| C | -1.07102200 | 3.10506800  | 1.12354600  |
| C | -0.45538500 | 4.60644400  | -1.17569400 |
| C | -1.98470700 | 4.02663400  | 0.59696400  |
| C | -1.68468100 | 4.76852100  | -0.54213800 |
| H | -0.22707900 | 5.19633400  | -2.05913100 |
| H | -2.94421800 | 4.16391000  | 1.08753600  |
| H | -2.40855200 | 5.47819800  | -0.93433900 |
| C | 4.31708300  | -0.48331600 | -0.55589100 |
| C | 5.81788400  | -0.22887800 | -0.31090300 |
| C | 4.05678500  | -0.94160200 | -2.00275100 |
| H | 3.79801900  | 0.47030100  | -0.42580000 |
| H | 6.00153400  | 0.13755700  | 0.70575600  |
| H | 6.19758300  | 0.52057800  | -1.01559900 |
| H | 6.40894300  | -1.14237200 | -0.44682100 |
| H | 2.98437200  | -1.05627000 | -2.18794900 |
| H | 4.54775100  | -1.89844900 | -2.21813800 |
| H | 4.45015800  | -0.20041900 | -2.70936700 |
| C | 1.22735500  | -1.62079900 | 3.40138200  |
| C | -0.02609100 | -2.51256200 | 3.33355800  |
| C | 1.83480600  | -1.62213000 | 4.81870900  |
| H | 0.90237600  | -0.59970400 | 3.18333400  |
| H | -0.48251500 | -2.45979100 | 2.34031900  |
| H | -0.76756900 | -2.17761400 | 4.06890400  |
| H | 0.20676100  | -3.56143000 | 3.55283800  |
| H | 2.69852000  | -0.95047400 | 4.88463700  |
| H | 2.17076200  | -2.62469400 | 5.10934200  |
| H | 1.09164200  | -1.29221900 | 5.55443600  |
| C | 1.84120000  | 3.56351500  | -1.39699200 |
| C | 1.68170100  | 3.14053800  | -2.86905100 |
| C | 2.66220300  | 4.86312300  | -1.27671700 |
| H | 2.40603400  | 2.77101800  | -0.89823300 |
| H | 1.15535400  | 2.18365700  | -2.93922100 |
| H | 2.66663700  | 3.02498700  | -3.33771300 |
| H | 1.12462400  | 3.88642600  | -3.44858300 |
| H | 2.81697900  | 5.14323600  | -0.22835700 |
| H | 2.16087100  | 5.70201300  | -1.77399600 |
| H | 3.64662500  | 4.73859000  | -1.74353200 |
| C | -1.42305200 | 2.32722300  | 2.38748000  |
| C | -1.60161200 | 3.27189100  | 3.59280800  |

|   |             |             |             |
|---|-------------|-------------|-------------|
| C | -2.66505900 | 1.44062400  | 2.18328800  |
| H | -0.58777600 | 1.65949000  | 2.61637000  |
| H | -0.70335400 | 3.87606700  | 3.76563200  |
| H | -1.80268900 | 2.69420000  | 4.50286500  |
| H | -2.44202400 | 3.96023200  | 3.44420500  |
| H | -2.50585300 | 0.73228500  | 1.36466800  |
| H | -3.55594200 | 2.03607800  | 1.95145200  |
| H | -2.87666300 | 0.86940100  | 3.09531200  |
| C | -0.75538700 | -1.46713400 | -2.53435600 |
| C | -0.49552700 | -0.36872300 | -3.36038200 |
| S | 0.24095300  | -2.84240500 | -3.03350400 |
| C | 0.49245700  | -0.63533300 | -4.35213800 |
| H | -1.04530700 | 0.56230900  | -3.28807500 |
| C | 0.98208700  | -1.91116700 | -4.29953000 |
| H | 0.82935300  | 0.10292300  | -5.07178400 |
| H | 1.75402700  | -2.35715900 | -4.91238200 |

---

**TS5**

Energy (RB3LYP) = -2404.176915436665 A.U.

Free Energy = -2403.585274079994 A.U.

---

|    |             |             |             |
|----|-------------|-------------|-------------|
| Pd | -0.60657100 | -0.21548900 | -0.96253300 |
| C  | 2.03845300  | 0.05620000  | -2.30773400 |
| C  | 1.07119900  | -0.95367900 | -2.37012500 |
| C  | -0.01125500 | -0.63624400 | -3.25928800 |
| C  | 0.13400700  | 0.60563000  | -3.84725600 |
| S  | 1.60931800  | 1.37742600  | -3.37493200 |
| H  | 1.21856900  | -1.93121200 | -1.92165900 |
| H  | -0.80806300 | -1.32465200 | -3.51574700 |
| C  | -2.75486500 | 1.16204200  | 2.47934000  |
| C  | -3.48405000 | 0.05732900  | 2.19173700  |
| H  | -2.85085900 | 1.89397800  | 3.26603700  |
| H  | -4.34744900 | -0.37235500 | 2.67528100  |
| N  | -1.74888600 | 1.23710000  | 1.51808700  |
| N  | -2.90696700 | -0.51698400 | 1.06114700  |
| C  | -1.81871800 | 0.19958700  | 0.61683400  |
| C  | -3.40890900 | -1.71675400 | 0.43957700  |
| C  | -4.39717500 | -1.60167000 | -0.55861300 |
| C  | -2.91374100 | -2.96404800 | 0.86986300  |
| C  | -4.87961000 | -2.78323100 | -1.13507000 |
| C  | -3.43056900 | -4.11384900 | 0.25968100  |
| C  | -4.40243600 | -4.02802000 | -0.73346000 |
| H  | -5.63830500 | -2.72604400 | -1.91076000 |
| H  | -3.06393700 | -5.08955400 | 0.56626200  |
| H  | -4.78991600 | -4.93306100 | -1.19423400 |
| C  | -0.75810300 | 2.28435000  | 1.49621100  |
| C  | -1.02694200 | 3.45949300  | 0.76646000  |
| C  | 0.42922400  | 2.11023800  | 2.23505300  |
| C  | -0.06196700 | 4.47406000  | 0.78994700  |
| C  | 1.36065000  | 3.15602100  | 2.22335000  |
| C  | 1.12048900  | 4.32716600  | 1.51005700  |
| H  | -0.24014600 | 5.39094500  | 0.23484800  |

|    |             |             |             |
|----|-------------|-------------|-------------|
| H  | 2.28746400  | 3.04868900  | 2.77995700  |
| H  | 1.85610500  | 5.12750400  | 1.51575700  |
| C  | -4.93670600 | -0.25476500 | -1.02937200 |
| C  | -6.45807900 | -0.14201400 | -0.81144000 |
| C  | -4.55881400 | 0.01390900  | -2.49886400 |
| H  | -4.46242700 | 0.52740300  | -0.43003600 |
| H  | -6.72451700 | -0.30062000 | 0.23990600  |
| H  | -6.81157200 | 0.85364000  | -1.10475500 |
| H  | -7.00929800 | -0.87775900 | -1.40882400 |
| H  | -3.47070100 | -0.00389000 | -2.62192500 |
| H  | -4.99658500 | -0.73511200 | -3.16994800 |
| H  | -4.92611900 | 0.99891600  | -2.81227500 |
| C  | -1.84310000 | -3.09555100 | 1.94827200  |
| C  | -0.53485800 | -3.66422400 | 1.36579800  |
| C  | -2.33629400 | -3.93285000 | 3.14425100  |
| H  | -1.61626400 | -2.09355300 | 2.32321300  |
| H  | -0.16507700 | -3.01911900 | 0.56132600  |
| H  | 0.23589600  | -3.72176800 | 2.14398200  |
| H  | -0.67975900 | -4.67365000 | 0.96202000  |
| H  | -3.25024300 | -3.51131600 | 3.57849700  |
| H  | -2.55237000 | -4.96782300 | 2.85417500  |
| H  | -1.57032500 | -3.96281300 | 3.92819300  |
| C  | -2.31009400 | 3.65441700  | -0.03463700 |
| C  | -2.01352000 | 3.81214200  | -1.53820000 |
| C  | -3.13799600 | 4.83877100  | 0.50136200  |
| H  | -2.91812800 | 2.75244800  | 0.07696200  |
| H  | -1.47204900 | 2.93854200  | -1.91562600 |
| H  | -2.94999300 | 3.90919400  | -2.10133300 |
| H  | -1.41002100 | 4.70558700  | -1.73895900 |
| H  | -3.38380500 | 4.70776500  | 1.56155000  |
| H  | -2.59825800 | 5.78777500  | 0.40004700  |
| H  | -4.07785200 | 4.93051100  | -0.05609000 |
| C  | 0.72832600  | 0.83973900  | 3.02429100  |
| C  | 0.89770000  | 1.13191300  | 4.52806700  |
| C  | 1.95536000  | 0.10308500  | 2.45401200  |
| H  | -0.12672300 | 0.16638800  | 2.91701500  |
| H  | 0.01002200  | 1.62288400  | 4.94371900  |
| H  | 1.05986900  | 0.19891400  | 5.08077900  |
| H  | 1.75852500  | 1.78343000  | 4.71931900  |
| H  | 1.79915100  | -0.14714000 | 1.39972800  |
| H  | 2.86407500  | 0.71187300  | 2.52944100  |
| H  | 2.13065100  | -0.82744100 | 3.00758200  |
| C  | 3.29157200  | 0.06868000  | -1.58715000 |
| C  | 4.10141100  | 1.13894900  | -1.26734700 |
| S  | 4.01232500  | -1.43240000 | -1.01063400 |
| C  | 5.28658700  | 0.78198300  | -0.56231400 |
| H  | 3.84110000  | 2.16346500  | -1.51041300 |
| C  | 5.36552400  | -0.56421400 | -0.35029400 |
| H  | 6.03225900  | 1.49072000  | -0.22304300 |
| H  | -0.53296700 | 1.09271500  | -4.54537000 |
| Br | 6.77373600  | -1.50802000 | 0.58823800  |

---

**CP8**

Energy (RB3LYP) = -2020.79638598 A.U.

Free Energy = -2403.593611438597 A.U.

---

|    |             |             |             |
|----|-------------|-------------|-------------|
| Pd | 0.04645800  | -0.53775500 | -0.16134700 |
| C  | 3.48002100  | -1.51038200 | 0.06523000  |
| C  | 3.08956200  | -0.91467600 | -1.09206400 |
| C  | 1.77923100  | -1.32897700 | -1.54041000 |
| C  | 1.16481700  | -2.20140700 | -0.59474600 |
| S  | 2.27400100  | -2.55527100 | 0.76984700  |
| H  | 3.70429200  | -0.21099600 | -1.64223400 |
| Br | 0.00494100  | -3.74642100 | -1.14164000 |
| Br | 5.12693000  | -1.14119700 | 1.02961000  |
| C  | -1.93079500 | 3.19750900  | 0.89995000  |
| C  | -2.89363800 | 2.30748200  | 1.24280600  |
| H  | -1.89814000 | 4.27368800  | 0.96648500  |
| H  | -3.87461800 | 2.44619700  | 1.66956000  |
| N  | -0.86615700 | 2.45624500  | 0.39274400  |
| N  | -2.39213500 | 1.04558300  | 0.93653300  |
| C  | -1.12985800 | 1.11112500  | 0.40506600  |
| C  | -3.12125400 | -0.18017100 | 1.15990700  |
| C  | -3.94325000 | -0.67710800 | 0.12852800  |
| C  | -2.99951800 | -0.82317400 | 2.40841600  |
| C  | -4.64925400 | -1.86040600 | 0.37767300  |
| C  | -3.72923100 | -2.00244500 | 2.60286300  |
| C  | -4.54472800 | -2.51867200 | 1.59975000  |
| H  | -5.28666800 | -2.27291100 | -0.39920600 |
| H  | -3.65361000 | -2.52450900 | 3.55250600  |
| H  | -5.09972500 | -3.43733800 | 1.77064300  |
| C  | 0.35980700  | 3.05341400  | -0.07938400 |
| C  | 0.42648200  | 3.49579100  | -1.41551600 |
| C  | 1.43361200  | 3.19748400  | 0.82124200  |
| C  | 1.62463200  | 4.08051400  | -1.84443300 |
| C  | 2.60961900  | 3.78435800  | 0.33751200  |
| C  | 2.70816500  | 4.21954600  | -0.98120600 |
| H  | 1.70834500  | 4.43145100  | -2.86920100 |
| H  | 3.45873400  | 3.90162600  | 1.00480400  |
| H  | 3.63013100  | 4.67327600  | -1.33561500 |
| C  | -4.08728400 | 0.02023700  | -1.22049400 |
| C  | -5.54062000 | 0.47192800  | -1.46632000 |
| C  | -3.57339900 | -0.86530900 | -2.37210900 |
| H  | -3.46473100 | 0.91947600  | -1.20633800 |
| H  | -5.89721700 | 1.13037800  | -0.66568700 |
| H  | -5.61389000 | 1.01890000  | -2.41380800 |
| H  | -6.22483000 | -0.38281900 | -1.52329100 |
| H  | -2.51881500 | -1.12161600 | -2.23002200 |
| H  | -4.14712700 | -1.79660400 | -2.44978900 |
| H  | -3.67443800 | -0.33268800 | -3.32624600 |
| C  | -2.11750200 | -0.28557200 | 3.53120600  |
| C  | -0.99593500 | -1.27807500 | 3.89330300  |
| C  | -2.95218200 | 0.09074200  | 4.77141800  |
| H  | -1.63352800 | 0.62841300  | 3.17492200  |
| H  | -0.37428200 | -1.50073100 | 3.01972600  |

|   |             |             |             |
|---|-------------|-------------|-------------|
| H | -0.35160100 | -0.85386400 | 4.67277400  |
| H | -1.40074700 | -2.22334500 | 4.27370800  |
| H | -3.72631200 | 0.82677600  | 4.52529100  |
| H | -3.45115600 | -0.78529500 | 5.20211700  |
| H | -2.30845600 | 0.52128300  | 5.54755900  |
| C | -0.74932200 | 3.38319600  | -2.38149700 |
| C | -0.39355500 | 2.55400400  | -3.62962900 |
| C | -1.27986700 | 4.77801100  | -2.77056700 |
| H | -1.55971900 | 2.85594600  | -1.86997100 |
| H | -0.10331700 | 1.53560800  | -3.35352700 |
| H | -1.26224600 | 2.49262000  | -4.29702100 |
| H | 0.42556600  | 3.01068400  | -4.19833800 |
| H | -1.57368400 | 5.35702400  | -1.88728600 |
| H | -0.52259300 | 5.35854200  | -3.31076000 |
| H | -2.15656200 | 4.68513200  | -3.42257200 |
| C | 1.35337700  | 2.75270100  | 2.27808900  |
| C | 1.54217200  | 3.94202700  | 3.24056700  |
| C | 2.35589300  | 1.62329700  | 2.57923900  |
| H | 0.35246500  | 2.34833700  | 2.45404300  |
| H | 0.80767300  | 4.73321800  | 3.05016900  |
| H | 1.42447600  | 3.61177500  | 4.27942600  |
| H | 2.54060500  | 4.38467200  | 3.14528400  |
| H | 2.17545900  | 0.76180100  | 1.92881300  |
| H | 3.39134100  | 1.95139800  | 2.43121100  |
| H | 2.25581800  | 1.29477800  | 3.62087400  |
| C | 1.45984800  | -1.27827500 | -3.01495200 |
| H | 2.11086700  | -0.53113300 | -3.49803500 |
| H | 1.70507000  | -2.26026600 | -3.45821400 |
| O | 0.10027800  | -0.97850400 | -3.27100100 |
| C | -0.25050900 | -1.19832200 | -4.62346300 |
| H | -1.30777600 | -0.94240300 | -4.72224500 |
| H | 0.33747100  | -0.56452200 | -5.30689100 |
| H | -0.10646900 | -2.25140600 | -4.91090800 |

**CP9**

Energy (RB3LYP) = -2020.83174504 A.U.

Free Energy = -2403.593611438597 A.U.

---

|    |             |             |             |
|----|-------------|-------------|-------------|
| Pd | -0.47801100 | -0.16316400 | 0.01023100  |
| C  | -4.96258000 | -0.44702100 | 0.33216400  |
| C  | -4.37939600 | -0.94190700 | 1.46364200  |
| C  | -2.95231200 | -0.86795000 | 1.37242900  |
| C  | -2.47983200 | -0.33192400 | 0.18915700  |
| S  | -3.80546400 | 0.10154300  | -0.84829000 |
| H  | -4.93275900 | -1.33320000 | 2.31050900  |
| Br | -0.73475300 | 1.07895600  | -2.16890100 |
| Br | -6.87750300 | -0.34288300 | -0.00656100 |
| C  | 3.88906100  | -0.09181300 | -0.32689100 |
| C  | 3.66262800  | 1.19764900  | 0.01376800  |
| H  | 4.80016300  | -0.62217200 | -0.55365600 |
| H  | 4.33858500  | 2.02563100  | 0.14907900  |
| N  | 2.64831600  | -0.72377700 | -0.33282100 |

|   |             |             |             |   |             |             |            |
|---|-------------|-------------|-------------|---|-------------|-------------|------------|
| N | 2.28867600  | 1.33367800  | 0.19477100  | H | 3.31620100  | -1.34866600 | 1.88961000 |
| C | 1.64029800  | 0.14551400  | -0.01752700 | H | 5.47265000  | -2.51292600 | 1.38801300 |
| C | 1.69626000  | 2.58430100  | 0.63029000  | H | 5.16356600  | -2.40804600 | 3.13154600 |
| C | 1.64071200  | 3.66663500  | -0.27374200 | H | 4.91315500  | -3.93728900 | 2.27479400 |
| C | 1.27592000  | 2.69846000  | 1.97490600  | H | 1.41557400  | -2.49674900 | 2.95397500 |
| C | 1.12485000  | 4.87878300  | 0.20419600  | H | 2.39302200  | -3.96016400 | 3.19957800 |
| C | 0.76072100  | 3.93208200  | 2.38894200  | H | 2.81906800  | -2.46288400 | 4.03751700 |
| C | 0.68228400  | 5.01223900  | 1.51467900  | C | -1.95299700 | -1.30196400 | 2.40446200 |
| H | 1.06343400  | 5.72888700  | -0.46746400 | H | -1.67225400 | -0.49937000 | 3.09320000 |
| H | 0.42255400  | 4.05328900  | 3.41251900  | H | -2.29036100 | -2.16029400 | 3.00098100 |
| H | 0.27855000  | 5.96075900  | 1.85861300  | O | -0.70655600 | -1.66013600 | 1.73551400 |
| C | 2.51991600  | -2.15333400 | -0.50758700 | C | -0.77816000 | -2.99284700 | 1.18760100 |
| C | 2.12204400  | -2.66621500 | -1.76017900 | H | 0.13083700  | -3.15607300 | 0.61313700 |
| C | 2.86219300  | -2.98330600 | 0.58253300  | H | -0.83092600 | -3.71344400 | 2.01336700 |
| C | 2.03929600  | -4.05961900 | -1.88434400 | H | -1.65537700 | -3.09342600 | 0.54173100 |
| C | 2.76896800  | -4.36868400 | 0.39485800  |   |             |             |            |
| C | 2.35499300  | -4.90297700 | -0.82192300 |   |             |             |            |
| H | 1.73093200  | -4.48972100 | -2.83157300 |   |             |             |            |
| H | 3.02318500  | -5.03522400 | 1.21418600  |   |             |             |            |
| H | 2.28553000  | -5.98046800 | -0.94617200 |   |             |             |            |
| C | 2.14994000  | 3.59065900  | -1.71230300 |   |             |             |            |
| C | 3.53751900  | 4.25692900  | -1.84156300 |   |             |             |            |
| C | 1.17704600  | 4.22708300  | -2.72324100 |   |             |             |            |
| H | 2.24542700  | 2.53502200  | -1.98281000 |   |             |             |            |
| H | 4.28486700  | 3.80536400  | -1.18019200 |   |             |             |            |
| H | 3.90571000  | 4.17167600  | -2.87077800 |   |             |             |            |
| H | 3.48145000  | 5.32349500  | -1.59281700 |   |             |             |            |
| H | 0.17231500  | 3.81203800  | -2.61745400 |   |             |             |            |
| H | 1.12326400  | 5.31628700  | -2.60882300 |   |             |             |            |
| H | 1.52441400  | 4.02539200  | -3.74315100 |   |             |             |            |
| C | 1.44025600  | 1.56544200  | 2.98704300  |   |             |             |            |
| C | 0.32342200  | 1.52514000  | 4.04461300  |   |             |             |            |
| C | 2.82146600  | 1.65126400  | 3.67225200  |   |             |             |            |
| H | 1.39510700  | 0.61572400  | 2.44684600  |   |             |             |            |
| H | -0.66815300 | 1.55929200  | 3.58072700  |   |             |             |            |
| H | 0.40049600  | 0.60091800  | 4.62874700  |   |             |             |            |
| H | 0.39228200  | 2.35902800  | 4.75280900  |   |             |             |            |
| H | 3.63829600  | 1.60349200  | 2.94399100  |   |             |             |            |
| H | 2.92180700  | 2.59168900  | 4.22751000  |   |             |             |            |
| H | 2.95167500  | 0.82445000  | 4.38128500  |   |             |             |            |
| C | 1.86194900  | -1.76758200 | -2.96527100 |   |             |             |            |
| C | 0.66086500  | -2.21966500 | -3.81286400 |   |             |             |            |
| C | 3.13556400  | -1.66488600 | -3.83225600 |   |             |             |            |
| H | 1.62333000  | -0.76568100 | -2.60105500 |   |             |             |            |
| H | -0.24206300 | -2.31636300 | -3.20249600 |   |             |             |            |
| H | 0.45647000  | -1.46945100 | -4.58340600 |   |             |             |            |
| H | 0.84499600  | -3.17390600 | -4.32147800 |   |             |             |            |
| H | 3.98521700  | -1.27499600 | -3.25971100 |   |             |             |            |
| H | 3.42265100  | -2.64547400 | -4.23164300 |   |             |             |            |
| H | 2.96299600  | -0.99133000 | -4.67959300 |   |             |             |            |
| C | 3.34534400  | -2.44086900 | 1.92759700  |   |             |             |            |
| C | 4.80895000  | -2.84915100 | 2.19271500  |   |             |             |            |
| C | 2.43457000  | -2.86963700 | 3.09442200  |   |             |             |            |
